# Supplementary material for: Evaluating the genome and resistome of extensively drug-resistant Klebsiella pneumoniae using native DNA and RNA Nanopore sequencing
Source: PubMed Central journal article supplement (PMC6998412; doi:10.1093/gigascience/giaa002), 2020-02-04
Supplement: giaa002_giga-d-19-00200_revision_1.pdf [file giaa002_giga-d-19-00200_revision_1.pdf]

## Evaluating the Genome and Resistome of Extensively Drug-Resistant *Klebsiella pneumoniae* using Native DNA and RNA Nanopore Sequencing

--Manuscript Draft--

|                                                      |                                                                                                                                                                                                                                                                                                                                                                                                                                                                                                                                                                                                                                                                                                                                                                                                                                                                                                                                                                                                                                                                                                                                                                                                                                                                                                                                                                                                                                                                                                                                                                                                                                                                                                                                                                                                                                                                                                                                                                                                                                                                                                           |                 |
|------------------------------------------------------|-----------------------------------------------------------------------------------------------------------------------------------------------------------------------------------------------------------------------------------------------------------------------------------------------------------------------------------------------------------------------------------------------------------------------------------------------------------------------------------------------------------------------------------------------------------------------------------------------------------------------------------------------------------------------------------------------------------------------------------------------------------------------------------------------------------------------------------------------------------------------------------------------------------------------------------------------------------------------------------------------------------------------------------------------------------------------------------------------------------------------------------------------------------------------------------------------------------------------------------------------------------------------------------------------------------------------------------------------------------------------------------------------------------------------------------------------------------------------------------------------------------------------------------------------------------------------------------------------------------------------------------------------------------------------------------------------------------------------------------------------------------------------------------------------------------------------------------------------------------------------------------------------------------------------------------------------------------------------------------------------------------------------------------------------------------------------------------------------------------|-----------------|
| <b>Manuscript Number:</b>                            | GIGA-D-19-00200R1                                                                                                                                                                                                                                                                                                                                                                                                                                                                                                                                                                                                                                                                                                                                                                                                                                                                                                                                                                                                                                                                                                                                                                                                                                                                                                                                                                                                                                                                                                                                                                                                                                                                                                                                                                                                                                                                                                                                                                                                                                                                                         |                 |
| <b>Full Title:</b>                                   | Evaluating the Genome and Resistome of Extensively Drug-Resistant <i>Klebsiella pneumoniae</i> using Native DNA and RNA Nanopore Sequencing                                                                                                                                                                                                                                                                                                                                                                                                                                                                                                                                                                                                                                                                                                                                                                                                                                                                                                                                                                                                                                                                                                                                                                                                                                                                                                                                                                                                                                                                                                                                                                                                                                                                                                                                                                                                                                                                                                                                                               |                 |
| <b>Article Type:</b>                                 | Research                                                                                                                                                                                                                                                                                                                                                                                                                                                                                                                                                                                                                                                                                                                                                                                                                                                                                                                                                                                                                                                                                                                                                                                                                                                                                                                                                                                                                                                                                                                                                                                                                                                                                                                                                                                                                                                                                                                                                                                                                                                                                                  |                 |
| <b>Funding Information:</b>                          | Institute for Molecular Bioscience Centre for Superbug Solutions (610246)                                                                                                                                                                                                                                                                                                                                                                                                                                                                                                                                                                                                                                                                                                                                                                                                                                                                                                                                                                                                                                                                                                                                                                                                                                                                                                                                                                                                                                                                                                                                                                                                                                                                                                                                                                                                                                                                                                                                                                                                                                 | Dr Lachlan Coin |
| <b>Abstract:</b>                                     | <p><b>Background:</b> <i>Klebsiella pneumoniae</i> frequently harbours multidrug resistance and current diagnostics struggle to rapidly identify appropriate antibiotics to treat these bacterial infections. The MinION device can sequence native DNA and RNA in real-time, providing an opportunity to compare the utility of DNA and RNA for prediction of antibiotic susceptibility. However, the effectiveness of bacterial direct RNA sequencing and base-calling has not previously been investigated. This study interrogated the genome and transcriptome of four extensively drug-resistant (XDR) <i>K. pneumoniae</i> clinical isolates, however, further antimicrobial susceptibility testing identified three isolates as pandrug-resistant (PDR).</p> <p><b>Results:</b> The majority of acquired resistance (<math>\geq 75\%</math>) resided on plasmids including several megaplasmids (<math>\geq 100</math> kbp). DNA sequencing detected most resistance genes (<math>\geq 70\%</math>) within 2 hours of sequencing. Neural-network based base-calling of direct RNA achieved up to 86% identity rate, although <math>\leq 23\%</math> of reads could be aligned. Direct RNA sequencing (with approximately 6 times slower pore translocation) was able to identify (within 10 hours) <math>\geq 35\%</math> of resistance genes, including those associated with resistance to aminoglycosides, <math>\beta</math>-lactams, trimethoprim and sulphamide and also quinolones, rifampicin, fosfomicin and phenicol in some isolates. Polymyxin-resistant isolates showed a heightened transcription of <i>phoPQ</i> (<math>\geq 2</math>-fold) and the <i>pmrHFIJKLM</i> operon (<math>\geq 8</math>-fold). Expression levels estimated from direct RNA sequencing displayed strong correlation (Pearson: 0.86) compared to qRT-PCR across eleven resistance genes.</p> <p><b>Conclusion:</b> Overall, MinION sequencing rapidly detected the XDR/ PDR <i>K. pneumoniae</i> resistome and direct RNA sequencing provided accurate estimation of expression levels of these genes.</p> |                 |
| <b>Corresponding Author:</b>                         | Lachlan Coin<br><br>AUSTRALIA                                                                                                                                                                                                                                                                                                                                                                                                                                                                                                                                                                                                                                                                                                                                                                                                                                                                                                                                                                                                                                                                                                                                                                                                                                                                                                                                                                                                                                                                                                                                                                                                                                                                                                                                                                                                                                                                                                                                                                                                                                                                             |                 |
| <b>Corresponding Author Secondary Information:</b>   |                                                                                                                                                                                                                                                                                                                                                                                                                                                                                                                                                                                                                                                                                                                                                                                                                                                                                                                                                                                                                                                                                                                                                                                                                                                                                                                                                                                                                                                                                                                                                                                                                                                                                                                                                                                                                                                                                                                                                                                                                                                                                                           |                 |
| <b>Corresponding Author's Institution:</b>           |                                                                                                                                                                                                                                                                                                                                                                                                                                                                                                                                                                                                                                                                                                                                                                                                                                                                                                                                                                                                                                                                                                                                                                                                                                                                                                                                                                                                                                                                                                                                                                                                                                                                                                                                                                                                                                                                                                                                                                                                                                                                                                           |                 |
| <b>Corresponding Author's Secondary Institution:</b> |                                                                                                                                                                                                                                                                                                                                                                                                                                                                                                                                                                                                                                                                                                                                                                                                                                                                                                                                                                                                                                                                                                                                                                                                                                                                                                                                                                                                                                                                                                                                                                                                                                                                                                                                                                                                                                                                                                                                                                                                                                                                                                           |                 |
| <b>First Author:</b>                                 | Miranda E. Pitt                                                                                                                                                                                                                                                                                                                                                                                                                                                                                                                                                                                                                                                                                                                                                                                                                                                                                                                                                                                                                                                                                                                                                                                                                                                                                                                                                                                                                                                                                                                                                                                                                                                                                                                                                                                                                                                                                                                                                                                                                                                                                           |                 |
| <b>First Author Secondary Information:</b>           |                                                                                                                                                                                                                                                                                                                                                                                                                                                                                                                                                                                                                                                                                                                                                                                                                                                                                                                                                                                                                                                                                                                                                                                                                                                                                                                                                                                                                                                                                                                                                                                                                                                                                                                                                                                                                                                                                                                                                                                                                                                                                                           |                 |
| <b>Order of Authors:</b>                             | Miranda E. Pitt<br>Son H. Nguyen<br>Tânia P.S. Duarte<br>Haotian Teng<br>Mark A.T. Blaskovich<br>Matthew A. Cooper<br>Lachlan Coin                                                                                                                                                                                                                                                                                                                                                                                                                                                                                                                                                                                                                                                                                                                                                                                                                                                                                                                                                                                                                                                                                                                                                                                                                                                                                                                                                                                                                                                                                                                                                                                                                                                                                                                                                                                                                                                                                                                                                                        |                 |

|                                                |                                                                                                                                                                                                                                                                                                                                                                                                                                                                                                                                                                                                                                                                                                                                                                                                                                                                                                                                                                                                                                                                                                                                                                                                                                                                                                                                                                                                                                                                                                                                                                                                                                                                                                                                                                                                                                                                                                                                                                                                                                                                                                                                                                                                                                                                                                                                                                                                                                                                                                                                                                                                                                                                                                                                                                                                                                                                                                                                                                                                                                                                                                                                                                                                                                                                                                                                                                                                                                                                                                                                                                                                                                                                                                                                                                                                                                                                                                                                                                                                                                                                                                                                                                                                                                                                                                                                                                                                                                                                       |
|------------------------------------------------|-----------------------------------------------------------------------------------------------------------------------------------------------------------------------------------------------------------------------------------------------------------------------------------------------------------------------------------------------------------------------------------------------------------------------------------------------------------------------------------------------------------------------------------------------------------------------------------------------------------------------------------------------------------------------------------------------------------------------------------------------------------------------------------------------------------------------------------------------------------------------------------------------------------------------------------------------------------------------------------------------------------------------------------------------------------------------------------------------------------------------------------------------------------------------------------------------------------------------------------------------------------------------------------------------------------------------------------------------------------------------------------------------------------------------------------------------------------------------------------------------------------------------------------------------------------------------------------------------------------------------------------------------------------------------------------------------------------------------------------------------------------------------------------------------------------------------------------------------------------------------------------------------------------------------------------------------------------------------------------------------------------------------------------------------------------------------------------------------------------------------------------------------------------------------------------------------------------------------------------------------------------------------------------------------------------------------------------------------------------------------------------------------------------------------------------------------------------------------------------------------------------------------------------------------------------------------------------------------------------------------------------------------------------------------------------------------------------------------------------------------------------------------------------------------------------------------------------------------------------------------------------------------------------------------------------------------------------------------------------------------------------------------------------------------------------------------------------------------------------------------------------------------------------------------------------------------------------------------------------------------------------------------------------------------------------------------------------------------------------------------------------------------------------------------------------------------------------------------------------------------------------------------------------------------------------------------------------------------------------------------------------------------------------------------------------------------------------------------------------------------------------------------------------------------------------------------------------------------------------------------------------------------------------------------------------------------------------------------------------------------------------------------------------------------------------------------------------------------------------------------------------------------------------------------------------------------------------------------------------------------------------------------------------------------------------------------------------------------------------------------------------------------------------------------------------------------------------------------|
| <b>Order of Authors Secondary Information:</b> |                                                                                                                                                                                                                                                                                                                                                                                                                                                                                                                                                                                                                                                                                                                                                                                                                                                                                                                                                                                                                                                                                                                                                                                                                                                                                                                                                                                                                                                                                                                                                                                                                                                                                                                                                                                                                                                                                                                                                                                                                                                                                                                                                                                                                                                                                                                                                                                                                                                                                                                                                                                                                                                                                                                                                                                                                                                                                                                                                                                                                                                                                                                                                                                                                                                                                                                                                                                                                                                                                                                                                                                                                                                                                                                                                                                                                                                                                                                                                                                                                                                                                                                                                                                                                                                                                                                                                                                                                                                                       |
| <b>Response to Reviewers:</b>                  | <p>“Evaluating the Genome and Resistome of Extensively Drug-Resistant <i>Klebsiella pneumoniae</i> using Native DNA and RNA Nanopore Sequencing”<br/>GIGA-D-19-00200<br/>Response to Reviewers</p> <p>Dear Dr. Scott Edmunds,</p> <p>We thank the reviewers for the opportunity to revise this manuscript (GIGA-D-19-00200). Their comments have helped us significantly strengthen the work. We have now provided additional information including rationale for using direct RNA sequencing and particular analysis methodologies. Figures have also been modified to aid with the interpretation of data. To highlight the adjustments completed, we have also uploaded a mark-up version of the manuscript. Please find below a point-by-point response to the reviewers’ comments.</p> <p>Reviewer reports:</p> <p>Reviewer #1:<br/>In the manuscript "Evaluating the Genome and Resistome of Extensively Drug-Resistant <i>Klebsiella pneumoniae</i> using Native DNA and RNA Nanopore Sequencing" by Pitt et al., the authors describe datasets generated from multiple sequencing modalities of antibiotic-resistant clinical isolates, and discuss the potential of this technology for rapid detection of AMR. Although these methods and sequencing characterization and analysis are of importance to the field, there are several issues which remain to be addressed.</p> <p>Specific points:<br/>It would be useful to better establish the rationale for why direct detection of RNA transcripts matters, and what additional information direct RNA sequencing gets you that rapid cDNA conversion and sequencing can't. Perhaps the largest issue is - "Why rRNA-seq?" There doesn't seem to be an obvious benefit, given the poor time to detection compared to just DNA sequencing. Expression levels are useful, but could be determined from Illumina sequencing. Without splicing there are no isoforms to contend with, and the error rate adds difficulty in interpretation and determination of primary protein sequence. Additionally, most clinical bacterial characterization work doesn't use RNA-seq, and addressing the problems clearly (i.e. rRNA depletion, RNA instability) should be done at the outset.</p> <p>Response: We have now provided additional information to highlight the benefits of using direct RNA sequencing in the introduction and discussion. The time to detect antibiotic resistance using direct RNA sequencing was slower compared to DNA, however, this is only the first generation of the technology. The latest kit, SQK-RNA002, has shown advancements in data generation which unfortunately was not available during the time of this study. “Our findings show that the slower time-to-detection of resistance genes in direct RNA sequencing was due to both the level of expression as well as the slower translocation speed, and hence using cDNA would only partially overcome this limitation.” (Discussion: Line 396, also refer to Supplementary Figure S4). “Furthermore, library preparation time is halved for direct RNA sequencing due to the absence of cDNA synthesis” (Introduction: Line 57). Indeed, expression levels can be determined via Illumina sequencing, however, in the context of a diagnostic tool, Illumina platforms require the completion of the sequencing run (~48 hours) to output data and analysis to be performed. Nanopore technologies can output data as soon as it is generated to enable real-time analysis. Although bacteria lack splicing, long read sequencing has the potential to detect operon sites where several transcripts are co-expressed (refer to Line 59 and 417). Due to difficulties extracting RNA from these strains and downstream processing for sequencing, these transcripts were short and not enough data was generated to confidently detect operon sites (Supplementary Figure S3). Furthermore, native RNA sequencing has the potential to detect RNA modifications associated with antibiotic resistance which are removed when converted to cDNA and is unique to this technology (Introduction: Line 55). Although RNA is unstable and requires several additional processing steps compared to DNA, advancements on this part could be made in the future and hence, the potential for this to be used to detect antibiotic resistance was explored. We have now made note of the limitations associated with</p> |

RNA sequencing in the clinic (Discussion: Line 368). Additionally, RNA has the potential to determine the functionality of a resistance genes as the presence of these genes does not necessarily mean they confer resistance (Discussion: Line 369).

Under the "DNA extractions and HMW DNA isolation methods section", this section should be rewritten for clarity - it was confusing to determine which isolations worked and which didn't, and why. It's still important to include details of why protocol modifications were made, but if these could be incorporated into methods better that would aid in understanding.

Response: This section has now been rewritten ("High molecular weight DNA isolation", page 4). Several modifications were implemented primarily due to difficulties lysing these highly antibiotic-resistant *K. pneumoniae* strains potentially due to a thickened capsule wall. This resulted in capsule contamination (carbohydrate) as determined via Nanodrop (Line 96). This was very cumbersome for isolate 2\_GR\_12 which was noted to have an increased carbohydrate contamination potentially due to the capsule and required a further purification step (Line 97).

Under "real-time resistome detection emulation" as well as "assembly of genomes" sections, it would be helpful to include a rationale on why certain software tools were chosen over others, given you tried many options. For example, why was BWA-MEM chosen over minimap2?

Response: In light of the vast amount of software tools available, we selected the four most commonly used tools for bacterial assembly. These incorporated both hybrid assemblers (Unicycler, npScarf) and the remaining two using only Nanopore reads (Canu, Minimap2/ Miniiasm/ Racon). We trialed analysis using minimap2 initially, however, a lower alignment rate was observed potentially due to the majority of reads being less than 1000 bp (Supplementary Figure S3). This has now been mentioned in the supplementary section: Supplementary Table S6 and noted in the main text (Line 148) which also notes adjusted parameters used for BWA-MEM when using ONT reads.

How were you able to distinguish multiple copies of resistance genes from duplicated misassemblies?

Response: Both the fragment distribution (Supplementary Figure S1) and the read-length distribution (Supplementary Figure S3 A-D) indicate substantial number of reads of length greater than 10kb. The vast majority of bacterial repeats are shorter than 10kb, meaning that we are able to correctly place these repeats in the assembly. Furthermore, these long reads were able to span the duplicated resistance gene regions and correctly assemble these plasmids.

Would it actually be faster to detect with cDNA sequencing, given faster motor protein translocation rate and likely higher copy number of transcripts of interest? It would be useful to include thoughts on this in the discussion.

Response: While the sequencing speed of cDNA is currently faster than direct RNA (450 bases/second vs 70 bases per second) the library preparation for direct RNA is much quicker (105 minutes vs 270 minutes). Moreover, it is anticipated that future direct RNA sequencing kits will run at the same translocation speed as cDNA. We considered the translocation speed impeding on the detection method, hence, why we included an analysis total yield required to detect resistance genes as well as time to call the resistance genes (Line 266, Supplementary Figure S4). We have now added an additional sentence in the discussion: "Our findings show that the slower time-to-detection of resistance genes in direct RNA sequencing was due to both the level of expression as well as the slower translocation speed, and hence using cDNA would only partially overcome this limitation." (Line 396).

You say "Nanopore DNA sequencing currently has an accuracy ranging from 80 to 90%, which limits its ability to detect genomic variations", but there are post-processing tools available to increase accuracy and ability to detect SNVs - this should be included in the discussion.

Response: Agreed, there are tools to improve the accuracy which we have now made note of in the discussion: "However, software tools such as Nanopolish (<https://github.com/jts/nanopolish>) and Tombo (<https://github.com/nanoporetech/tombo>) (similarly used to re-train Chiron v0.5 for direct RNA sequencing data) have the potential to correct these reads and would be helpful to integrate to increase the

accuracy of detecting resistance genes.” (Line 359).

Further the detection of SNV mutations and indels is critical with respect to the detection of chromosomal mutations in these samples. Additional consideration of methylation signatures is crucial, as they can cause systematic error (PMID: 30373801) if not corrected.

Response: We have now noted the influence of DNA modifications on the accuracy of Nanopore sequencing and included this publication. “We utilised native DNA sequencing in this study which retains epigenetic modifications such methylation which can hinder the accuracy of reads and subsequent calling of antibiotic resistance [58].” (Line 362).

“All isolates exhibited low levels of expression for fosfomycin, macrolide and tetracycline resistance, despite exhibiting phenotypic resistance to fosfomycin and tetracycline”, but are high levels of expression essential for phenotypic resistance? Are these low levels surprising? It would be helpful to link to papers discussing this.

Response: Additional information has now been included to identify why low expression of particular genes was observed. Limited literature is available on these specific genes in *K. pneumoniae* with transcriptional and antimicrobial susceptibility testing. We have included the following sentence regarding fosfomycin resistance facilitated via the *fosA* gene: “Notably, Klontz et al identified that chromosomally integrated *FosA*, similarly observed in our study, from *K. pneumoniae* harboured a higher catalytic efficiency. A higher catalytic efficiency may reason why our strains only require a low abundance of expression and still retain fosfomycin resistance” (Line 382). Low levels of expression for tetracycline are not surprising as this resistance is well characterized and found to be inducible (antibiotic exposure is required for expression of genes). This has been reworded: “Genes *tet(A)* and *tet(G)* encode efflux pumps which, in the absence of tetracycline, are lowly expressed and the lack of antibiotic supplementation in this study confirms this observation [61]. Detecting inducible resistance (antibiotic exposure required for gene expression) such as tetracycline resistance highlights one of the advantages of investigating the transcriptome.” (Line 384)

Figure 5 - instead of switching back and forth between panels A and B, a scatterplot comparing the two directly like Fig 3 would be more useful.

Response: This figure has now been amended with the data on a single graph.

Why do you think only 23% RNA reads aligned? Did you try to identify the unaligned reads (like sort out contamination, noise)? It would be beneficial to include at least a blast/centrifuge style analysis trying to determine the source of the unaligned reads. Additionally, a k-mer analysis of the unaligned reads could help determine their origin.

Response: We identified that various failed reads were <10 bp (Supplementary Figure S3) which were filtered before alignment with BWA-MEM (k -11, seed length of 11 bp). Preliminary BLASTn analysis of unmapped reads identified a bacterial origin. The primary issue with the direct RNA sequencing data is the base-calling. When adapting Chiron v0.5 for this data, squiggle plots (raw nanopore data) identified insufficient trimming of the artificial poly(A). Furthermore, RNA modifications in bacteria remain largely unknown and this has the potential to interfere with the raw nanopore current change and subsequent base-calling. This has now been included in the discussion: “Limitations were observed when base-calling bacterial direct RNA sequencing and may be attributed to trimming the long artificial poly(A) tail and interference of RNA modifications.” (Line 391).

How much of the poor alignment is due to the method of preparation (i.e. polyA tailing, etc.)? Did the authors perform optimization of the extraction and library prep for bacterial RNA? What about using an alternative tail and RNA adaptor?

Response: We trialed phenol/ chloroform RNA extractions however, this process was lengthy and resulted in a low yield of RNA and increased impurities. The PureLink RNA Mini Kit protocol is relatively quick (<30 mins/ sample). We attempted an on-column DNase treatment during this protocol but the best DNA depletion was observed using TURBO DNase which doesn't work on column (requires 37°C incubation). Our optimized RNA extraction resulted in Bioanalyzer RNA integrity scores of ≥8.5 which has now been included in Line 116 (RIN scale 0-10, 10 is no degradation using 16S and 23S pecks as reference). We considered altering the library preparation including

using an adapter similar to Smith et al (reference 26) which recognizes the Shine-Dalgarno sequence, however, there are deviations in this sequence and multi antisense adapters would be required so all transcripts are sequenced. Hence, the poly(A) tailing kit was more feasible as it will tag all 3'transcripts which allows for only the native RNA strand to be sequenced. Unfortunately, we were unaware of the efficiency of the polymerase until post sequencing analysis was performed (Supplementary Figure S6), hence, a shorter incubation can be implemented for future studies.

Viral direct RNA seq has been done (PMID: 30765700 and 30258076 for example) - it would be good to cite these or related papers.

Response: The updated publication of PMID: 30765700 rather than the preprint has been included in the references and PMID: 30258076 was originally incorporated in the introduction as reference 24 (refer to Line 54 for references referring to viral direct RNA sequencing). To our knowledge, all the publications on direct RNA sequencing are in the references.

Some minor points:

"This research also established a methodology and analysis for bacterial direct RNA sequencing." is repeated in the conclusions.

Response: This duplicated sentence has now been removed from the conclusions section.

Figure 2 colorblocking is a little confusing - could be more straightforward to break up the figure into separate panels per strain contig, for example with a ggplot facet\_grid.

Response: Figure 2 has now been modified so genes belonging to particular contigs are easier to identify. This included adjusting the transparency of the colorblocking and splitting the x-axis similar to the ggplot facet\_grid format.

Reviewer #2:

This manuscript presents a rapid resistance-gene discovery experiment, using genome sequencing and assembly to identify potentially-active genes, combined with differential expression to determine drug-free resistome activity. This manuscript is differentiated from most other direct-RNA and cDNA nanopore research, in that it is the \*expression\* rather than the \*structure\* of the genes is evaluated here. Bearing in mind that I cannot comment much on the biology side of things, I consider this manuscript to be a reasonable presentation of the experimental work that has been described, and recommend that it be accepted pending minor changes to figures, and clarification of multi-mapping results. I would like to thank the authors for making their Nanopore sequence data public prior to review submission; it demonstrates a good open research ethic.

My specific comments regarding the manuscript follow:

\*\* Text \*\*

L133: This references a fairly old version of Canu (i.e. v1.5), which seems a bit strange given that Guppy v3.0.3 is also mentioned (L260). I note that Canu v1.8 was released before Guppy v3.0.3, and would be interested to know why this version of Canu was chosen.

Response: Genome assemblies were conducted initially in this study and the transcriptomics at a later date. As we were able to complete the assemblies adequately using the hybrid assembler Unicycler and utilize Illumina reads to correct ONT sequencing errors, we did not run analysis on the most recent version of Canu. Furthermore, Guppy was integrated later as we had multiple issues with the base-calling of direct RNA sequencing and we hoped this update in the software would ameliorate this problem.

L144: I don't have an encyclopaedic knowledge of bwa-mem command-line options. It would be helpful to explain what the options mean. I'm particularly interested in why the default options were not appropriate, and what (if any) compensations were made for multi-mapped reads.

Response: This section has now been updated: "Similar parameters to the BWA-MEM ont2d function were used but seed length was reduced (-k 14) to compensate for shorter reads: -k 11 [minimum seed length, bp] -W20 [bandwidth] -r10 [gap extension penalty] -A1 [match score] -B1 [mismatch penalty] -O1 [Gap open penalty] -E1 [Gap

extension penalty] -L0 [Clipping penalty]). Multi-mapping reads were removed via SAMtools (secondary alignment: flagged as 256)...” (Line 149).

L144: Why was minimap2 not used here? It was written by the same author as bwa-mem, but is specifically written to incorporate corrections to improve mapping for noisy Nanopore Direct RNA-seq [e.g. see <https://github.com/lh3/minimap2#getting-started>]

Response: Preliminary analysis using minimap2 showed fewer reads aligning to the reference (now noted in the legend of Supplementary Table S6). It has been noted by Li H (doi: 10.1093/bioinformatics/bty191) that BWA-MEM is more suited to short read data and has a slightly improved accuracy compared to minimap2. We’ve further noted the bias towards BWA-MEM in Line 148: “BWA-MEM was selected due to shorter transcripts being produced by bacteria (Supplementary Figure S3) and the lack of introns and alternative splicing.”

L145: I notice from L198 that there are gene copies in the data, with potentially high identity. Is there a particular reason why reads were mapped to the genome, rather than to transcriptome that merges essentially-identical genes?

Response: As described in the “Real-time resistome detection emulation” section (line 127), the resistance gene detection was carried out by mapping to a database of resistance genes which was clustered based on 90% identity threshold. However, in the section “RNA alignment and expression profiling” (Line 146) we mapped reads to the genome. In this case, if a read mapped to multiple locations equally well, then BWA-MEM randomly allocates to one position (primary alignment). Several instances of multiple copy numbers of resistance genes (Line 215) occurred which will influence the quantification of expression when aligned to the genome. Interestingly, there were some slight deviations in the expression of perfectly duplicated genes with unique flanking regions (refer to strA and sul1 in Figure 2A, contig 2 and 4) which may indicate that these genes are controlled by an operon (co-transcribed genes). This is an advantage of aligning to the genome. We also took this into consideration when graphing Figure 3 and combined all reads mapping to duplicated genes, such as strA, before normalizing to a housekeeping gene (rpsL).

L153: Why was a more well-known differential expression package not used here (e.g. DESeq2 or EdgeR) for evaluating differential expression? Is there an advantage of VGAM for plasmid or small genome differential expression?

Response: The beta-binomial distribution (implemented in VGAM) was used as a statistic to identify genes with significantly fewer or greater reads mapping in one sample versus another. It was chosen because it represents the uncertainty in the proportion estimated from count data. However, we agree that EdgeR and DESeq2 are also able to adequately estimate this uncertainty and hence we have redone the analysis using EdgeR (Supplementary Figure S7, Methods: “Whole transcriptome gene expression and estimation of expression confidence intervals”, Line 157). The list of differentially expressed genes is very similar to that identified using VGAM (at least 90% identical).

L198 (see also L145): How identical were these genes? Would this identity affect genome mapping? In situations with multiple copies of near-identical genes, do you have any evidence to suggest that only one copy was active?

Response: These genes are 100% similar and will impact mapping to the genome. Unless expressed by an operon and the full-length sequences are retrieved, only then could this distinguish which genes are active. This issue will still arise if transcripts are mapped to the transcriptome. The only definitive way to determine this would be to perform knock-down studies of these regions and subsequently evaluate expression.

L218: What was the MAPQ probability for these genes? If the MAPQ probability is less than 3, it means that a gene could be equally-well placed at least two different sites ( $-\log_{10}(0.5) * 10 \approx 3$ ), which is expected given the gene duplication in your assemblies. I don't think this would indicate that the mapping is bad, as such, although there may be other reasons for a poor mapping.

Response: Agreed, the MAPQ score was commonly  $\leq 10$  for these duplicated reads. We have made a note of low mapping quality due to multiple copies of genes: “Low mapping quality could be attributed to assignment of reads to multiple copies of genes in the genome. Furthermore, the ONT error rates could lead to misassignment of reads to genes.” (Line 275).

L228 (see also L198): more information about the similarity between the "correct" and "incorrect" gene would be useful; I notice that L335 mentions an identity for some genes of "greater than or equal to 80%". Do you have other evidence that systematic sequencing error would lead to reads being assigned to the incorrect gene?

Response: Various resistance genes harbor  $\geq 80\%$  similarity when taking into consideration genes deposited on the ResFinder database. In several instances, this is only 1 nucleotide and if sequencing errors arise, have the potential for misidentification. We can determine this accumulation of sequencing errors via observing the real-time emulation for DNA sequencing in Supplementary S5. After 5 hours (300 minutes), we could witness multiple genes being detected that were not identified in the final assembly and the Illumina only SPAdes assembly.

L245 (see also L218): Were there multiple *fosA* transcripts in the genome? I can't see from Table 1 any indication of this, but maybe it's not clear enough for me. If not, can you suggest other reasons for the low MAPQ score? It seems like a lot of results are being thrown away because the MAPQ is low.

Response: Only one copy of *fosA* is encoded on the chromosome for all isolates (Line 194). All genes with multiple copies have been noted in Line 215. The mapping quality is most likely due to the low expression of this gene and difficulties with base-calling (issues removing the long artificial poly(A) tail and interference of RNA modifications (Line 393). Once base-calling tools have been optimized for bacterial direct RNA sequencing, MAPQ scores will be a better quality.

L336 (see also L228 and L198): Would 80% identity lead to a misclassification by BWA-MEM?

Response: Yes, as some genes are very similar (potentially only one nucleotide difference), this has the potential to result in misclassification of resistance genes in the real-time emulation. Especially when we identified a 10% error rate in our ONT DNA sequencing (Line 356) and  $\leq 23\%$  for direct RNA sequencing (Line 394).

L341: I get a bit frustrated by people discussing accuracy from previous (typically quite old) nanopore papers as if it were a fixed thing, especially in a study that has produced a lot of other nanopore data. Nanopore technology changes quickly, and basecalling accuracy has made substantial improvements in particular over the last year. I'm not convinced a paper published in January 2018 would give a good estimate for accuracy called with guppy 3.0.3 (or 3.1.5, which is the latest that I'm aware of at the time of this review). Feel free to cite it, but I'd like to know [in the same breath] what the direct RNA accuracy was in \*your\* reads. L260-264 briefly discuss using different base-callers; how does that accuracy change depending on the base-caller?

Response: We have now included information regarding accuracy between base-callers: "Albacore 2.2.7 had the highest average accuracy across isolates (84.87%) closely followed by Guppy 3.0.3 (84.62%) and then Chiron v0.5 (78.19%) (Supplementary Table S6)." Line 279. The abstract also notes that we could identify accuracy up to 86% for direct RNA sequencing (Line 20).

**\*\* Figures \*\***

Figure 1:

- Would work better as a side-by-side bar plot. The split graph makes it look like one side is negative, and the other side is positive.
- Order by colour / class rather than abundance, with brackets indicating classifications.

Response: We initially considered side-by-side bar plots however, this would result in approximately 40 bars on the y-axis which is difficult to follow. We have now split the x-axis to better delineate between DNA and RNA data. Furthermore, an overlay of this data based on yield rather than time has been included in the supplementary results (Figure S4). The main text is written in the context of time to detect a particular gene conferring resistance to an antibiotic class, hence, why we ordered this as time of detection rather than grouping the antibiotic classes.

Figure 2:

- This figure is unclear to me. If this figure is relative expression (e.g. the statistic used for the correlation plot in Figure 3), then the presented data should be relative proportions, probably in log space (e.g.  $\log_2(\text{gene}/\text{rpsL})$ ).

- Why was rpsL chosen for normalisation?

Response: Unfortunately, the wrong figure legend was included for Figure 2 and has been amended. This data is counts per million (cpm) mapped reads rather than normalized to rpsL. We didn't adjust to relative proportions for this figure (or Figure 4, which is also in cpm) as the main text mentions cpm values. However, for comparisons of direct RNA to qRT-PCR (e.g. Figure 3 and Figure 5) we did normalize relative to housekeeping gene rpsL. This housekeeping gene has been used previously in literature (reference 46). We also have data for another housekeeping gene, rpoB, which generated similar results.

Figure 3:

- Were there any sample replicates? Are you able to estimate error in any measurements?

- The colour is confusing for this graph. You could try gene name for colour, and different plot symbols for different samples.

Response: All qRT-PCR measurements were done in triplicates (Line 170). There are no sample replicates for direct RNA sequence data. This is because the primary aim of the paper is to evaluate time-to-detection of antibiotic resistance genes across multiple samples (emulating a clinical setting in which a single replicate would be sequenced for each sample, particularly in the context of not having access to direct RNA multiplexing and so running a single sample in a single flow cell). However, we can estimate variation in the proportion of reads mapping to each gene (and hence the counts-per-million) by assuming the observed read counts are generated from a binomial distribution, so we can estimate a 90% CI in the expression levels using the conjugate beta prior. We show these estimates in Supplementary Figure S7.

Regarding the colours, there are 4 samples and eleven genes, so we didn't think colouring by gene would work (too many genes). We selected to colour by sample, and indicate the gene names on the plot. We have followed the suggestion of using different symbols per isolate.

Figure 4:

- What do the bottom panels describe (e.g. gene expression level scatter plots comparing each sample with each other sample)? This is not stated in the figure legend.

Response: Yes, the bottom panels include the expression levels between differing isolates in a scatter plot. This has now been added to the legend.

Figure 5:

- I recommend changing this to a side-by-side bar plot, as the text indicates that the comparison of A vs B is important.

Response: This figure has now been amended with the data on a single graph.

Reviewer #3:

The manuscript by Pitt et al interrogated the genome and transcriptome of PDR and XDR *K. pneumoniae* isolates using the Oxford Nanopore MinION device. This is the very first study which adopted nanopore approaches in direct bacterial mRNA sequencing. The authors established a methodology for adding poly(A) tail onto mRNA transcripts which will benefit future bacterial sequencing and diagnosis related studies. However, authors failed to explain clearly the advantage of using Nanopore for RNA sequencing to Illumina platform. In another word, why we need to develop RNA sequencing using Nanopore since it is not an efficient way to do it and very complicated. In addition, the manuscript indeed showed that the coverage of RNA seq is very low and the correlation is not good. In my view, if there is no specific need to do RNA seq using Nanopore platform, there is no need to develop it since the Illumina platform is very good already in this application.

Response: Please refer to our first response to Reviewer #1.

In addition, I also have the following major comments:

1. Line 169, section "Antibiotic resistance and the location of acquired resistance in the genome" The authors reported the AMR genes and their location in this section. Since this is a technical manuscript, can the authors provide some sequencing information? The volume of data generated with time, coverage of each sequenced sample, the



accuracy of the sequence, and the comparison of different assembly methods could be briefly discussed.

Response: We've now included additional information regarding the DNA sequencing: "MinION DNA sequencing for all isolates was run for  $\geq 20$  hours which generated 1.19 GB (215X) for 1\_GR\_13, 0.39 GB (67X) for 2\_GR\_12, 0.56 GB (101X) for 16\_GR\_13 and 0.64 GB (115X) for 20\_GR\_12 (Supplementary Table S2). Across the differing assembly tools, the chromosome sequence commonly circularised as a 5.0-5.4 Mb contig including plasmids ranging between 13-193 kb with the exception of 2\_GR\_12. Aligning ONT reads to the final assembly revealed that this DNA sequencing had a 90% accuracy rate across isolates." (Line 184) A comparison of several assembly methods is given in Supplementary Table 2, but we don't discuss this in much detail in the paper as it is not the focus of this work.

2. Line 256, only a low proportion of these RNA sequencing reads passed base-calling. Is it also related to the sample preparation apart from the inaccuracy of the base-calling software?

Response: Indeed, RNA sample preparation could influence the subsequent quality of the data and we attempted several protocol optimizations. We trialed phenol/ chloroform RNA extractions however, this process was lengthy and resulted in a low yield of RNA and increased impurities. The PureLink RNA Mini Kit protocol is relatively quick (<30 mins/ sample). We attempted an on-column DNase treatment during this protocol but the best DNA depletion was observed using TURBO DNase which doesn't work on column (requires 37°C incubation). Our optimized RNA extraction resulted in Bioanalyzer RNA integrity scores of  $\geq 8.5$  which has now been included in Line 116 (RIN scale 0-10, 10 is no degradation using 16S and 23S pecks as reference). Unfortunately, we were unaware of the efficiency of the polymerase until post sequencing analysis was performed (Supplementary Figure S6), hence, a shorter incubation can be implemented for future studies. However, the majority of inaccuracy appears to be due to the base-calling software unable to accurately trim the long artificial poly(A) tail and potential interference to the raw read signal via RNA modifications (Line 391).

3. Would the authors compare the genome and transcriptome a little bit to link these data?

Response: We have drawn various comparisons between the genome and transcriptome to link the sequencing data. In particular, tables and figures comparing both RNA and DNA include Figure 1, Table S5, Figure S3 and Figure S4 with corresponding sections in the main text. Additional information in the discussion has been provided to highlight the pros and cons regarding interpreting antibiotic resistance using either DNA or RNA. "We further investigated the transcriptome of these isolates to potentially elucidate the correlation between genotype and the subsequent resistant phenotype. Detection of antibiotic resistance via sequencing commonly uses DNA due to the instability of RNA and the lengthy sample processing such as rRNA depletion [12-15, 58]. However, RNA provides additional information regarding the functionality of genes such as identifying conditions in which a resistance gene is present but not active which gives rise to a false positive via DNA alone. Conversely, if expression is only induced in the presence of an antibiotic, the absence of RNA transcripts results in a false negative." (Line 367). "Furthermore, the time required to detect resistance may be hindered by the slower translocation speed associated with direct RNA sequencing (70 bases/ second) compared to DNA sequencing (450 bases/ second) [57]. Although cDNA would overcome this limitation, our findings show that detection was primarily due to level of expression when evaluating data yield rather than time." (Line 394).

4. Line 381, "a number of resistance genes were identified that were not present in the final assembly. The authors were expected to discuss why this happens and how to deal with these false positive data.

Response: The discussion on this topic has now been extended: "Furthermore, a small number of resistance genes were identified that were not present in the final assembly, however these all had MAPQ values less than 10 and less than 30 mapped reads. Some of these may be due to low-level kit contamination, while some of the false positives have sequence similarity to true positives and may be due to inaccuracies in base-calling." (Line 363).

**Additional Information:**

| Question                                                                                                                                                                                                                                                                                                                                                                                                                                                                                                                            | Response   |
|-------------------------------------------------------------------------------------------------------------------------------------------------------------------------------------------------------------------------------------------------------------------------------------------------------------------------------------------------------------------------------------------------------------------------------------------------------------------------------------------------------------------------------------|------------|
| <p>Are you submitting this manuscript to a special series or article collection?</p>                                                                                                                                                                                                                                                                                                                                                                                                                                                | <p>No</p>  |
| <p><b>Experimental design and statistics</b></p> <p>Full details of the experimental design and statistical methods used should be given in the Methods section, as detailed in our <a href="#">Minimum Standards Reporting Checklist</a>. Information essential to interpreting the data presented should be made available in the figure legends.</p> <p>Have you included all the information requested in your manuscript?</p>                                                                                                  | <p>Yes</p> |
| <p><b>Resources</b></p> <p>A description of all resources used, including antibodies, cell lines, animals and software tools, with enough information to allow them to be uniquely identified, should be included in the Methods section. Authors are strongly encouraged to cite <a href="#">Research Resource Identifiers</a> (RRIDs) for antibodies, model organisms and tools, where possible.</p> <p>Have you included the information requested as detailed in our <a href="#">Minimum Standards Reporting Checklist</a>?</p> | <p>Yes</p> |
| <p><b>Availability of data and materials</b></p> <p>All datasets and code on which the conclusions of the paper rely must be either included in your submission or deposited in <a href="#">publicly available repositories</a> (where available and ethically appropriate), referencing such data using a unique identifier in the references and in the “Availability of Data and Materials” section of your manuscript.</p>                                                                                                      | <p>Yes</p> |

Have you have met the above requirement as detailed in our [Minimum Standards Reporting Checklist?](#)

[Click here to view linked References](#)

# 1 **Evaluating the Genome and Resistome of Extensively Drug-Resistant *Klebsiella pneumoniae*** 2 **using Native DNA and RNA Nanopore Sequencing**

3

4 Miranda E. Pitt<sup>1</sup>, Son H. Nguyen<sup>1</sup>, Tânia P.S. Duarte<sup>1</sup>, Haotian Teng<sup>1</sup>, Mark A.T. Blaskovich<sup>1</sup>, Matthew A. Cooper<sup>1</sup>,  
5 Lachlan J.M. Coin<sup>1</sup>

6 <sup>1</sup> Institute for Molecular Bioscience, The University of Queensland, Brisbane, Queensland, 4072, Australia

7 Corresponding authors: Miranda Pitt (miranda.pitt@imb.uq.edu.au, ORCID: 0000-0002-8255-4036) and Lachlan  
8 Coin (l.coin@imb.uq.edu.au, ORCID: 0000-0002-4300-455X)

9

## 10 **Abstract**

11 **Background:** *Klebsiella pneumoniae* frequently harbours multidrug resistance and current diagnostics struggle to  
12 rapidly identify appropriate antibiotics to treat these bacterial infections. The MinION device can sequence native  
13 DNA and RNA in real-time, providing an opportunity to compare the utility of DNA and RNA for prediction of  
14 antibiotic susceptibility. However, the effectiveness of bacterial direct RNA sequencing and base-calling has not  
15 previously been investigated. This study interrogated the genome and transcriptome of four extensively drug-resistant  
16 (XDR) *K. pneumoniae* clinical isolates, however, further antimicrobial susceptibility testing identified three isolates  
17 as pandrug-resistant (PDR).

18 **Results:** The majority of acquired resistance ( $\geq 75\%$ ) resided on plasmids including several megaplasmids ( $\geq 100$  kbp).  
19 DNA sequencing detected most resistance genes ( $\geq 70\%$ ) within 2 hours of sequencing. Neural-network based base-  
20 calling of direct RNA achieved up to 86% identity rate, although  $\leq 23\%$  of reads could be aligned. Direct RNA  
21 sequencing (with approximately 6 times slower pore translocation) was able to identify (within 10 hours)  $\geq 35\%$  of  
22 resistance genes, including those associated with resistance to aminoglycosides,  $\beta$ -lactams, trimethoprim and  
23 sulphonamide and also quinolones, rifampicin, fosfomycin and phenicol in some isolates. Polymyxin-resistant isolates  
24 showed a heightened transcription of *phoPQ* ( $\geq 2$ -fold) and the *pmrHFIJKLM* operon ( $\geq 8$ -fold). Expression levels  
25 estimated from direct RNA sequencing displayed strong correlation (Pearson: 0.86) compared to qRT-PCR across  
26 eleven resistance genes.

27 **Conclusion:** Overall, MinION sequencing rapidly detected the XDR/ PDR *K. pneumoniae* resistome and direct RNA  
28 sequencing provided accurate estimation of expression levels of these genes.

## 29 **Introduction**

30 *Klebsiella pneumoniae* is one of the leading causes of nosocomial infections, with reports of mortality rates as high  
31 as 50% [1-5]. This opportunistic pathogen commonly exhibits multidrug resistance which severely limits treatment  
32 options [6]. A high abundance of resistance is frequently encoded on plasmids, accounting for the rapid global  
33 dissemination of resistance [1,6]. Common therapeutic options for multidrug-resistant infections include  
34 carbapenems, fosfomycin, tigecycline and polymyxins [7]. However, resistance is also rapidly developing against  
35 these antibiotics resulting in the emergence of extensively drug-resistant (XDR) and subsequent pandrug-resistant  
36 (PDR) strains [6-9].

37 One of the major contributors to the advent of antibiotic resistance is the inability for current detection methodologies  
38 to readily and accurately assess bacterial infections in particular, the resistance profile [10]. Rapid sequencing has  
39 been proposed as a way to determine antibiotic resistance, including approaches which utilise high accuracy short  
40 reads, as well as those which exploit real-time single-molecule sequencing such as Oxford Nanopore Technologies  
41 (ONT). The ONT MinION platform is a portable single-molecule sequencer which can sequence long fragments of  
42 DNA and stream the sequence data for further data processing in real-time, detecting the presence of bacterial species  
43 and acquired resistance genes [11-15]. Moreover, the long reads coupled with the ability to multiplex samples has  
44 immensely aided with the assembly of bacterial genomes [16-18]. This capability allows for the rapid determination  
45 of whether resistance is residing on the chromosome or plasmid/s. Of particular interest are high levels of resistance  
46 encoded on plasmids, as these genes can rapidly be transferred throughout the bacterial population via horizontal gene  
47 transfer. However, a limitation of DNA sequencing is accurately identifying whether the presence of an acquired  
48 resistance gene or mutation is facilitating resistance.

49 ONT has recently released a direct RNA sequencing capability, which sequences native transcripts. Other sequencing  
50 technologies rely on fragmentation, cDNA conversion and PCR steps that create experimental bias and hinder the  
51 accuracy of determining gene expression [19, 20]. The ability for MinION sequencing to read long fragments enables  
52 full length transcripts to be investigated. To date, only a few direct RNA sequencing publications exist which include  
53 eukaryote transcriptomes, primarily yeast (*Saccharomyces cerevisiae* [19, 21]) and recently, *Homo sapiens* [22]. This  
54 sequencing has additionally been implemented in viral transcriptomics [23-25]. Only one prior study by Smith AM *et*  
55 *al.* has applied this sequencing to bacterial 16S ribosomal RNA (rRNA) to detect RNA modifications [26]. Notably,  
56 resistance to certain antibiotics, such as aminoglycosides, can arise via RNA modifications which are unable to be

57 detected once RNA is converted to cDNA [26]. Furthermore, library preparation time is halved for direct RNA  
58 sequencing due to the absence of cDNA synthesis. Bacterial transcription differs significantly from eukaryotes in that  
59 transcription and translation occur simultaneously. As a result, bacterial mRNA transcripts lack poly(A) tails and  
60 alternative splicing, however, genes can be co-transcribed if regulated via an operon [27]. The poly(A) tail is critical  
61 for the library preparation for ONT sequencing thus, we have established a methodology for adding this component  
62 onto transcripts.

63 In this study, we applied MinION sequencing to interrogate both the genome and the transcriptome (via direct RNA  
64 sequencing) for XDR *K. pneumoniae* clinical isolates. Of interest was to compare the potential for RNA sequencing  
65 to provide a better correlation to the resistance phenotype than DNA sequencing. These isolates have previously  
66 undergone ‘traditional’ whole genome sequencing (Illumina) and antimicrobial susceptibility testing [28]. An  
67 extended panel of antibiotics was tested in this study to identify PDR isolates. Three strains were selected from this  
68 cohort which exhibited resistance to all 24 antibiotics or antibiotic combinations tested, a high abundance of antibiotic  
69 resistance genes ( $\geq 26$ ) and differing lineages (ST11 (16\_GR\_13), ST147 (1\_GR\_13) and ST258 (2\_GR\_12)).  
70 Additionally, these isolates harbour polymyxin resistance which is facilitated by a disruption in or upstream of *mgrB*.  
71 Variations in the *mgrB* gene result in increased expression of the *pmrCAB* and *pmrHFIJKLM* operon, enables the  
72 addition of phosphoethanolamine and/ or 4-amino-4-deoxy-L-arabinose (Ara4N) to lipid A and subsequently  
73 facilitates polymyxin resistance [29]. These pathways associated with polymyxin resistance were further explored  
74 using direct RNA sequencing and compared against a polymyxin-susceptible XDR isolate (ST258; 20\_GR\_12). This  
75 research aimed to assemble these genomes, discern expression of resistance genes and ascertain the time required for  
76 detection. Furthermore, we sought to compare DNA and RNA sequencing as modalities for the rapid identification of  
77 acquired antibiotic resistance.

78

## 79 **Methods**

### 80 ***Bacterial strains and growth conditions***

81 XDR *K. pneumoniae* clinical strains were sourced through the Hygeia General Hospital, Athens, Greece [28].  
82 Antimicrobial susceptibility assays (Supplementary Table S1), sequence typing and detection of acquired resistance  
83 genes have previously been determined [28]. Strains were stored at -80°C in 20% (v/v) glycerol, the identical stock  
84 was used as per the prior study and the extended panel of antimicrobial susceptibility testing conducted similarly [28].

85 When required for extractions, glycerol stocks were grown on lysogeny broth (LB) agar and 6 morphologically similar  
86 colonies were selected for inoculation. The inoculum was grown in LB overnight at 37°C shaking at 220 rpm. This  
87 overnight inoculum was used for both DNA and RNA extractions.

#### 88 ***High molecular weight DNA isolation***

89 DNA was extracted from 10 ml of overnight culture using the DNeasy Blood and Tissue Kit (Qiagen) according to  
90 manufacturer's guidelines, with the addition of an enzymatic lysis buffer pre-treatment (60 mg/ml lysozyme).  
91 Following the DNeasy extraction, high molecular weight (HMW) DNA was isolated using the MagAttract HMW  
92 DNA Kit (Qiagen) as per manufacturer's instructions. An additional proteinase K treatment at 56°C for 10 min  
93 followed by supplementation of RNase A (1 mg) for 15 min at room temperature was included to increase DNA purity.  
94 Several direct extractions from bacterial overnight cultures using the HMW kit were performed, however, low DNA  
95 yield was observed and the initial DNeasy extraction was essential. An additional purification step following the  
96 HMW DNA extraction was critical for 2\_GR\_12 as carbohydrate contamination (260/230 ratio:  $\leq 0.3$ ) was identified  
97 potentially due to a thickened capsule. This purification included the Monarch<sup>®</sup> PCR & DNA Cleanup Kit (New  
98 England BioLabs) using the protocol to isolate fragments >2000 bp.

#### 99 ***RNA extraction, mRNA enrichment and poly(A) addition***

100 The overnight inoculum was sub-cultured in 10 ml of cation-adjusted Muller Hinton Broth (caMHB) to reflect the  
101 media used for minimum inhibitory concentration (MIC) assays. Cultures were grown to mid-log phase ( $OD_{600} = 0.5-$   
102  $0.6$ ). RNA was extracted via the PureLink<sup>™</sup> RNA Mini Kit (Thermo Fisher Scientific) as per manufacturer's protocols  
103 which included using Homogenizer columns (Thermo Fisher Scientific). To remove DNA contamination, the TURBO  
104 DNA-free<sup>™</sup> kit was implemented. A minor adjustment was an increased concentration of TURBO DNase (4 U)  
105 incubated at 37°C for 30 min. The RNeasy Mini Kit (Qiagen) clean up protocol was used to purify and concentrate  
106 RNA samples. Ribosomal RNA was depleted via the MICROBExpress<sup>™</sup> Bacterial mRNA Enrichment Kit (Thermo  
107 Fisher Scientific). Minor protocol changes included adding  $\geq 2$   $\mu\text{g}$  of DNA depleted RNA and the enriched mRNA  
108 was precipitated for 3 h at -20°C. Poly(A) addition was performed using the Poly(A) Polymerase Tailing Kit (Astral  
109 Scientific) as per the manufacturer's alternative protocol (4 U input of Poly(A) Polymerase). The input RNA  
110 concentration was  $\geq 800$  ng and RNA samples were incubated at 37°C for 1 h. Poly(A) ligated RNA was purified using  
111 Agencourt AmpureXP (Beckman Coulter Australia) beads (1:1 ratio).

#### 112 ***Extraction quality control***

113 DNA and RNA were quantitated using Qubit®2.0 (Thermo Fisher Scientific) and purity determined with a NanoDrop  
114 1000 Spectrophotometer (Thermo Fisher Scientific). DNA fragment sizes were measured using the Genomic DNA  
115 ScreenTape & Reagents (Agilent) and sizes from 200 to >60000 bp were analyzed on a 4200 TapeStation System  
116 (Agilent) (Supplementary Figure S1). RNA fragment size was checked using an Agilent RNA 6000 Pico kit and run  
117 on a 2100 Bioanalyzer (Agilent Technologies) for the initial RNA extract (RIN:  $\geq 8.5$ ), post ribosomal RNA depletion  
118 and after poly(A) tailing (Supplementary Figure S2).

### 119 ***ONT library preparation and sequencing***

120 RNA libraries ( $\geq 600$  ng poly(A)<sup>+</sup> RNA) were prepared using the Direct RNA Sequencing kit (SQK-RNA001). The  
121 Rapid Barcoding Sequencing kit (SQK-RBK001) was used for HMW DNA samples (1\_GR\_13, 16\_GR\_13,  
122 20\_GR\_12; 300 ng input each). Isolate 2\_GR\_12 (300 ng input) was prepared separately using the Rapid Sequencing  
123 Kit (SQK-RAD003). Libraries were sequenced with MinION R9.4 flowcells and the raw data (fast5 files) were base-  
124 called using Albacore 2.1.1 for DNA sequencing (Supplementary Figure S3). For benchmarking purposes, RNA reads  
125 were additionally base-called with Albacore 2.2.7, Guppy 3.0.3 and the Chiron v0.5 [30] RNA base-caller which was  
126 trained in-house (<https://github.com/haotianteng/Chiron/releases/tag/v0.5>).

### 127 ***Real-time resistome detection emulation***

128 The real-time emulation was performed post sequencing and the time required to detect antibiotic resistance was  
129 determined as previously described [14]. Briefly, this pipeline aligns Albacore base-called reads via BWA-MEM [31]  
130 to an antibiotic resistance gene database. Antibiotic resistance genes were obtained from the ResFinder 3.0 database  
131 [32]. This dataset comprises of 2131 genes which were clustered based on 90% identity to form 611 groups or gene  
132 families. The detection of false positives is reduced using the multiple sequence alignment software kalign2 [33], a  
133 probabilistic Finite State Machine [34] and once the alignment score reached a threshold, the resistance gene was  
134 reported.

### 135 ***Assembly of genomes***

136 To assemble genomes with both Illumina and ONT reads, SPAdes v3.10.1 [35] was utilised. Hybrid assemblers  
137 included npScarf [36] and Unicycler v0.3.1 [37]. Assemblers using only ONT reads included Canu v1.5 (excluding  
138 reads <500bp) [38] and the combination of Minimap2 v2.1-r311 and Miniasm v0.2-r168-dirty; Racon (git commit  
139 834442) were used in both cases to polish the assemblies [39, 40]. Consensus sequences were determined using Mauve  
140 (snapshot\_2015-02-13) to construct the final assembly [41]. The output from each assembly software is reported in



141 Supplementary Table S2. Genomes were annotated using the Rapid Annotation using Subsystem Technology (RAST)  
142 which also provided a list of virulence genes [42]. The location of acquired antibiotic resistance genes were determined  
143 using ResFinder 3.0 [32] and plasmids were identified via PlasmidFinder 1.3 [43]. To discern if plasmid sequences  
144 have previously been reported, contigs underwent a BLASTn analysis against the National Center for Biotechnology  
145 Information (NCBI) database (<https://blast.ncbi.nlm.nih.gov/Blast.cgi>).

#### 146 ***RNA alignment and expression profiling***

147 Base-called RNA reads were converted to DNA (uracil bases changed to thymine) and aligned using BWA-MEM  
148 [31] to the updated genome assemblies. BWA-MEM was selected due to shorter transcripts being produced by bacteria  
149 (Supplementary Figure S3) and the lack of introns and alternative splicing. Similar parameters to the BWA-MEM  
150 ont2d function were used but seed length was reduced (-k 14) to compensate for shorter reads: -k 11 [minimum seed  
151 length, bp] -W20 [bandwidth] -r10 [gap extension penalty] -A1 [match score] -B1 [mismatch penalty] -O1 [Gap open  
152 penalty] -E1 [Gap extension penalty] -L0 [Clipping penalty]). Multi-mapping reads were removed via SAMtools  
153 (secondary alignment: flagged as 256) [44] and BEDTools coverage [45] was used to ascertain the expression of  
154 resistance genes in counts per million (cpm) mapped reads (post removing reads mapping to rRNA). To compare  
155 against qRT-PCR results, read counts were normalised the housekeeping gene, *rpsL* [46]. Read alignments were  
156 further visualised using Integrative genomics viewer 2.3.59 [47].

#### 157 ***Whole transcriptome gene expression and estimation of expression confidence intervals***

158 We identified genes which were differentially expressed in one sample (versus all remaining samples) using a quasi-  
159 likelihood F-test in EdgeR [48] with a FDR threshold of 0.01. Expression levels (in cpm) were extracted for every  
160 significant gene in any one of these one versus remaining differential expression analyses in order to generate an  
161 expression heatmap. The expression heatmap is based on the  $\log_{10}(\text{cpm})$  for each of these genes.

162 In order to estimate the 90% confidence intervals in cpm estimates from direct RNA sequence data, we assumed that  
163 the observed counts were generated from a binomial distribution with unobserved probability of success ( $p$ ). We  
164 estimate the 5% and 95% percentiles from a beta-distribution with shape parameters equal to the number of reads  
165 mapped to a given gene ( $\alpha$ ) and the number of reads mapped elsewhere ( $\beta$ ) plus a pseudo-count of 0.1. The  
166 90% confidence interval (CI) is calculated as the difference between the expression levels at the 5% and 95%  
167 percentile.

#### 168 ***Quantitative real-time reverse transcriptase PCR (qRT-PCR)***

169 First strand cDNA synthesis was performed on 1 µg of total DNA-depleted RNA using SuperScript III (Thermo Fisher  
170 Scientific). Primers used are displayed in Supplementary Table S3. Samples were prepared in triplicate via the SYBR  
171 Select Master Mix (Thermo Fisher Scientific) and expression detected using a ViiA 7 Real-time PCR system (Thermo  
172 Fisher Scientific). Cycling conditions include: Hold 50°C (2 min), 95°C (2 min) followed by 50 cycles of: 95°C (15  
173 sec), 55°C (1 min). A melt curve was included to determine the specificity of the amplification and a no template  
174 control to detect contamination or primer dimers. Results were analysed with QuantStudio™ Real-Time PCR  
175 Software, triplicates were averaged, normalised to the housekeeping gene *rpsL* [46] and relative expression determined  
176 via the  $2^{-\Delta\Delta CT}$  method [49].

177

## 178 **Results**

### 179 ***Antibiotic resistance and the location of acquired resistance in the genome***

180 This study assayed nine additional antibiotics or antibiotic combinations to further characterise the phenotypic  
181 resistance of these isolates (Supplementary Table S1). Strains 1\_GR\_13, 2\_GR\_12 and 16\_GR\_13 were non-  
182 susceptible to all antibiotics including the 24 antibiotics tested previously [28]. 20\_GR\_12 was only susceptible to  
183 gentamicin and polymyxins.

184 MinION DNA sequencing for all isolates was run for  $\geq 20$  hours which generated 1.19 GB (215X) for 1\_GR\_13, 0.39  
185 GB (67X) for 2\_GR\_12, 0.56 GB (101X) for 16\_GR\_13 and 0.64 GB (115X) for 20\_GR\_12 (Supplementary Table  
186 S2). Across the differing assembly tools, the chromosome sequence commonly circularised as a 5.0-5.4 Mb contig  
187 including plasmids ranging between 13-193 kb with the exception of 2\_GR\_12. Aligning ONT reads to the final  
188 assembly revealed that DNA sequencing had 90% accuracy across isolates.

189 Utilising the capacity for MinION sequencing to read long fragments of DNA, the location of antibiotic resistance  
190 genes were clearly resolved (Table 1). All genomes were circular with the exception of 2\_GR\_12 where 3 plasmids  
191 remained linear. This was partly due to difficulties extracting DNA, not retaining long fragments and subsequently,  
192 lower coverage of the genome (Supplementary Figure S1, Table S2). Amongst the four isolates, the chromosome size  
193 ranged between 5.1-5.5 Mb which encoded resistance genes *blaSHV-11*, *fosA* and *oqxAB*. The majority of resistance  
194 ( $\geq 75\%$ ) mapped to plasmids.

195 At least one megaplasmid, defined as a plasmid larger than 100 kbp, was detected in all isolates (Table 1). These  
196 commonly harboured the replicon IncA/C2 or InFIB and IncFIIK. The IncA/C2 plasmid was present in all samples

197 except 20\_GR\_12. This plasmid contained up to 16 resistance genes which conferred resistance towards  
198 aminoglycosides,  $\beta$ -lactams, phenicols, rifampicin, sulphonamides, tetracyclines and trimethoprim, with the exception  
199 of 16\_GR\_13. Isolate 16\_GR\_13 lacked trimethoprim resistance on its IncA/C2 plasmid. The plasmids containing  
200 both replicons IncFIB and IncFIIK differed vastly between all four replicates. All contained IncFIB<sub>pKpn3</sub> and IncFIIK,  
201 however, 1\_GR\_13 differed with IncFII<sub>pKP91</sub>. Additionally, a differing IncFIB replicon was detected on a separate  
202 contig in 1\_GR\_13 (pKPHS1) and 2\_GR\_12 (pQil). The only instance where another dual replicon was identified was  
203 in 1\_GR\_13 which harboured both IncR and IncN. This plasmid contained aminoglycoside,  $\beta$ -lactam, trimethoprim,  
204 macrolide and sulphonamide resistance. 1\_GR\_13 also contained a 5.5 kb circular contig which was annotated as a  
205 phage genome. Various regions of these megaplasmids were unique to these isolates compared to prior sequences  
206 deposited on NCBI (Supplementary Table S5).

207 The ColRNAI plasmid was present in all except 1\_GR\_13 which encoded aminoglycoside and quinolone resistance  
208 (*aac(6')-Ib*, *aac(6')-Ib-cr*) (Table 1). The ColRNAI plasmid in 2\_GR\_12 and 20\_GR\_12 was 13841 bp in size and  
209 shared 75% similarity between the two isolates. This plasmid differed in 16\_GR\_13 which contained no resistance  
210 genes and 35% the size. The same IncX3 plasmid (43380 bp) was apparent in isolates 2\_GR\_12 and 20\_GR\_12.  
211 Unique to 16\_GR\_13 was the IncL/ M<sub>pOXA-48</sub> plasmid containing *blaOXA-48* and the 50979 bp IncN plasmid in  
212 20\_GR\_12 with resistance against 5 classes (aminoglycoside (*aph(3'')-Ib*, *aph(6)-Id*),  $\beta$ -lactam (*blaTEM-1A*),  
213 sulphonamide (*sul2*), tetracycline (*tet(A)*), trimethoprim (*dfrA14*)) of antibiotics.

214 Multiple copies of acquired resistance genes were apparent across plasmids in several isolates. For 1\_GR\_13, up to  
215 three copies were present of genes *aadA24*, *aph(3')-Ia*, *aph(6)-Id*, *dfrA1*, *dfrA14*, *strA* and *sul1* (Table 1). In 2\_GR\_12,  
216 *sul1* and *blaTEM-1A* were duplicated and for 16\_GR\_13, only *sul1* was represented twice.

### 217 ***Real-time detection emulation of resistance genes via DNA sequencing***

218 The vast majority ( $\geq 70\%$ ) of resistance genes were detected via DNA sequencing within the first 2 hours (Figure 1,  
219 Supplementary Table S5). These genes confer resistance towards aminoglycosides,  $\beta$ -lactams, fosfomycin,  
220 macrolides, phenicols, quinolones, rifampicin, sulphonamides, tetracyclines and trimethoprim. 20\_GR\_12 lacked  
221 acquired resistance genes for macrolides, phenicols and rifampicin, however, all other classes were detected within 2  
222 hours. All isolates, except 2\_GR\_12, were sequenced for 21 hours which was sufficient to obtain the complete genome  
223 assembly. Only a few additional genes were detected after the first 10 hours across isolates (Supplementary Table S5).  
224 For 2\_GR\_12, an extended run of 41 hours detected no further genes after 20 hours. Overall, the presence of these

225 resistance genes corresponded to a resistant phenotype towards aminoglycosides,  $\beta$ -lactams, fosfomycin, phenicols,  
226 quinolones, sulphonamides (sulfamethoxazole), tetracyclines and trimethoprim (Supplementary Table S1). As  
227 macrolides and rifampicin are not routinely used to treat *K. pneumoniae* infections, no breakpoints exist according to  
228 CLSI and EUCAST guidelines, however, all isolates exhibit an MIC  $\geq 128$   $\mu\text{g/ml}$  towards erythromycin (macrolide)  
229 and  $\geq 64$   $\mu\text{g/ml}$  for rifampicin (Supplementary Table S1).

230 Post 2 hours of sequencing, several genes not observed in the final assembly via ResFinder 3.0 were detected  
231 (Supplementary Table S5). These were predominantly genes attributed to aminoglycoside,  $\beta$ -lactam, rifampicin and  
232 phenicol resistance. Furthermore, resistance genes to additional classes were detected including fusidic acid and  
233 vancomycin. This was evident in 2\_GR\_12 (*fusB*) and 16\_GR\_13 (*fusB*, *vanR*). However, these genes had less than  
234 30 reads and their phred-scale mapping quality (MAPQ) scores were less than 10 (misplaced probability greater than  
235 0.1). Furthermore, the majority of genes not observed in the final assembly nor observed in Illumina data exhibited a  
236 MAPQ score of  $\leq 10$  which may indicate that a more stringent threshold is required to negate false positives. However,  
237 if this threshold increases, true positives would not be detected including *aadA1*, *aadA2* and *ARR-2* in 2\_GR\_12 and  
238 *blaOXA-48*, *blaCTX-M-15* and *ARR-2* in 16\_GR\_13.

239 Several genes found in the final assembly were not detected in the real-time emulation analysis (Supplementary Table  
240 S5). This was mainly observed for aminoglycoside resistance encoding genes. For 1\_GR\_13, this included *aadA1*,  
241 *ant(2'')-Ia*, *aph(6)-Id* and *aadA24*. Similarly, 2\_GR\_12 and 20\_GR\_12 lacked *aph(3'')-Ib* and *aph(6)-Id*. 2\_GR\_12  
242 additionally had the absence of *ant(2'')-Ia*. Detection of *ant(2'')-Ia*, *aph(3'')-Ib*, *aph(6)-Id* was not present in  
243 16\_GR\_13. 16\_GR\_13 further lacked *catB4* (phenicol) and *tet(A)* (tetracycline). Various phenicol resistance genes  
244 were reported in the real-time emulation however, the incorrect gene was identified which may represent sequencing  
245 errors accumulated over time and high similarity to other phenicol resistance genes. The tetracycline resistance gene,  
246 *tet(A)*, was interestingly not reported in this emulation with 190 reads and the majority of reads exhibiting a high  
247 mapping confidence (MAPQ = 60, equivalent to an error probability of  $1 \times 10^{-6}$ ). This gene was only detected after 10  
248 hours for 1\_GR\_13 and 2\_GR\_12 and this result may be influenced by the presence of only 1 copy of *tet(A)* encoded  
249 on a low copy number megaplasmid (between 1 to 1.5, see Table 1).

#### 250 ***Direct RNA sequencing resistance detection***

251 The time required to detect resistance was further interrogated using RNA sequencing. Rapid detection was possible  
252 for several resistance genes via direct RNA sequencing (Figure 1). This was evident for genes conferring resistance

253 to aminoglycosides,  $\beta$ -lactams, sulphonamides and trimethoprim for all four isolates. Resistance towards these  
254 antibiotics was commonly detected within 6 hours. In some instances, quinolone, rifampicin, fosfomycin and phenicol  
255 resistance was detected. A similar result was obtained whether all reads or passed reads alone were analysed. The  
256 most significant difference when analysing all reads was the detection of *fosA* in 1\_GR\_13 and *ARR-2* and *fosA* in  
257 2\_GR\_12. Consistently absent from this analysis were genes attributed to macrolide (*mph(A)*) and tetracycline (*tet(A)*,  
258 *tet(G)*) resistance, however, isolates exhibited high levels of resistance to tetracycline (>64  $\mu$ g/ml) (Supplementary  
259 Table S1). Commonly no new genes were detected after 12 hours of sequencing with the exception of *fosA* in  
260 2\_GR\_12. Although *fosA* was detected when including the failed reads, a low MAPQ score ( $\leq 10$ ) was apparent.  
261 Similar to the DNA real-time detection, several genes not found in the final assembly were identified (Supplementary  
262 Table S5). With the exception of 20\_GR\_12, this included *aadB* and *strB* for all isolates. Additional genes detected  
263 included *ARR-7* in 1\_GR\_13, *strA* in 2\_GR\_12 and for 16\_GR\_13, *blaCTX-M-64*, *blaOXA-436* and *strA*. Similar  
264 genes or gene families were identified when comparing DNA and direct RNA sequencing. Overall, genes were  
265 detected more readily via DNA sequencing however, there were a few instances where RNA sequencing detected  
266 resistance quicker: *aac(3')-IIa* in 16\_GR\_13 and *sul2* and *catA1* in 2\_GR\_12. Similar results were observed when  
267 investigating data yield rather than time which compensates for the slower translocation speed associated with direct  
268 RNA sequencing (Supplementary Figure S4).

### 269 ***Levels of expression of resistance genes***

270 RNA sequencing accumulated over approximately 40 hours yielded between 0.9 and 1.7 million reads for these  
271 isolates (Supplementary Figure S3). However, only a low proportion ( $\leq 14.64\%$ ) of these reads passed base-calling  
272 using Albacore 2.2.7 (Supplementary Table S6). Aligning passed reads alone to the final assembly,  $\geq 98\%$  of reads  
273 were mappable, however,  $\leq 40\%$  of these had a MAPQ score  $\geq 10$ . When all reads (pass and fail) were aligned, the  
274 majority were not mappable to the reference genome ( $\geq 76.69\%$ ) and commonly exhibited a low MAPQ score ( $\leq 10$ ).  
275 Low mapping quality could be attributed to assignment of reads to multiple copies of genes in the genome.  
276 Furthermore, the ONT error rates could lead to misassignment of reads to genes. In light of this, we decided to  
277 benchmark a number of different base-callers, including Albacore 2.2.7, Guppy 3.03 as well as Chiron v0.5 which  
278 was trained in-house (Supplementary Table S6, Figure S5). Chiron base-called more reads compared to Albacore 2.2.7  
279 and Guppy 3.0.3, however, fewer reads aligned to the reference genome and had a slightly lower identity rate. Albacore  
280 2.2.7 had the highest average accuracy across isolates (84.87%) closely followed by Guppy 3.0.3 (84.62%) and then

281 Chiron v0.5 (78.19%) (Supplementary Table S6). These results reflect the fact that base-calling algorithms have not  
282 yet been optimised for direct RNA sequencing, and even less so for bacterial RNA sequencing. The poly(A) length  
283 was commonly found to be approximately 400 to 700 bp across isolates (Supplementary Figure S6). Taking into  
284 consideration the Albacore 2.2.7 base-called reads, a proportion of these reads were found to map to rRNA including  
285 1\_GR\_13 (18%), 2\_GR\_12 (37%), 16\_GR\_13 (24%) and 20\_GR\_12 (23%). Overall, at least 58% of genes (with at  
286 least 1 read mapping to the gene) were identified to be expressed across isolates (1\_GR\_13 (68%), 2\_GR\_12 (58%),  
287 16\_GR\_13 (75%) and 20\_GR\_12 (69%).

288 Amongst the four isolates, levels of expression for resistance genes on the chromosome (*blaSHV-11*, *fosA* and *oqxAB*)  
289 were low ( $\leq 122$  counts per million mapped reads) (Figure 2). The remaining resistance genes were located on  
290 plasmids. Resistance genes exhibiting high levels of expression (300 cpm) were apparent in 1\_GR\_13 (*blaTEM-1B*,  
291 *blaVIM-27*, *sul1*, *aph(3')-Ia*), 2\_GR\_12 (*aac(6')-Ib*, *catA1*, *blaKPC-2*), 16\_GR\_13 (*aac(6')Ib-cr*, *aac(3)-IIa*, *blaCTX-*  
292 *M-15*, *blaTEM-1B*, *blaOXA-48*) and 20\_GR\_12 (*blaKPC-2*, *aac(6')Ib*). Counts for *aac(6')-Ib* and *aac(6')-Ib-cr* in  
293 2\_GR\_12 and 20\_GR\_12 were grouped. The gene *aac(6')-Ib-cr* is a shortened version of *aac(6')-Ib* and both were  
294 identified in the same genome position, hence, only *aac(6')-Ib* is displayed in Figure 2. Expression estimates did not  
295 differ significantly when analysing passed reads alone or all reads. We estimated the 90% confidence interval in cpm  
296 estimates using a beta-distribution (Supplementary Figure S7). All highly expressed genes were detected within 6  
297 hours as per the real-time detection emulation. As anticipated, low levels of expression were observed for fosfomycin  
298 (*fosA*), tetracycline (*tet(A)*, *tet(B)*) and macrolide (*mph(A)*) resistance.

299 A subset of 11 resistance genes which represent resistance across various classes of antibiotics were investigated to  
300 validate gene expression in these RNA extractions via qRT-PCR (Figure 3). These included resistance towards  
301 aminoglycosides (*aac(6')Ib*, *strA*),  $\beta$ -lactams (*blaKPC-2*, *blaOXA-10*, *blaTEM-1*), phenicols (*cmlA1*), trimethoprim  
302 (*dfpA14*), fosfomycin (*fosA*), quinolone (*oqxA*), sulphonamides (*sul2*) and tetracyclines (*tet(A)*). A similar trend was  
303 observed between direct RNA sequencing and qRT-PCR results (Spearman's rank correlation coefficient: 0.83;  
304 Pearson correlation: 0.86) (Figure 3). The highest expression of a resistance gene was observed for *blaKPC-2* although  
305 only one copy was present in a lower copy number plasmid in 2\_GR\_12 and 20\_GR\_12 (Figure 2, Figure 3 and Table  
306 1). Additionally, low levels of expression for *fosA* and *tet(A)* were apparent despite exhibiting resistance towards  
307 fosfomycin and tetracycline (Figure 3, Supplementary Table S1). Direct RNA sequencing was unable to detect low  
308 levels of expression whilst qRT-PCR could detect these genes (Figure 3).

309 Across the transcriptome, antibiotic resistance genes were identified to harbour high expression between isolates  
310 (Figure 4). Virulence genes were comparable across these strains similar to all remaining or background genes. The  
311 top differentially expressed genes were determined (Supplementary Figure S8) and several were associated with  
312 polymyxin resistance pathways. Heightened expression was seen in polymyxin-resistant isolates 1\_GR\_13, 2\_GR\_12,  
313 16\_GR\_13 in comparison to the single susceptible isolate (20\_GR\_12) in particular, genes associated with Ara4N  
314 synthesis. These genes include 4-deoxy-4-formamido-L-arabinose-phosphoundecaprenol deformylase (*arnD*), UDP-  
315 4-amino-4-deoxy-L-arabinose formyltransferase and UDP-4-amino-4-deoxy-L-arabinose-oxoglutarate  
316 aminotransferase.

### 317 *Transcriptional biomarkers for polymyxin resistance*

318 Three of the isolates harboured resistance towards polymyxins via disruptions in *mgrB* which included 1\_GR\_13,  
319 2\_GR\_12 and 16\_GR\_13. 1\_GR\_13. Isolate 1\_GR\_13 has an insertion sequence (IS) element, IS*Kpn26*-like, at  
320 nucleotide position 75 in the same orientation as *mgrB* whilst 2\_GR\_12 has this IS element in the opposite orientation  
321 plus additional mutations in *phoP* (A95S) and *phoQ* (N253T). 16\_GR\_13 harbours an IS element, IS*IR*-like, 19 bp  
322 upstream of *mgrB*. Direct RNA sequencing revealed only low-level expression of *mgrB* (1\_GR\_13 (78.4 cpm),  
323 2\_GR\_12 (16.3 cpm), 16\_GR\_13 (0 cpm), 20\_GR\_12 (2.3 cpm)). The expression levels of various genes associated  
324 with this pathway were verified via qRT-PCR (Figure 5). Direct RNA sequencing revealed a slight increase in  
325 transcription of *phoPQ* ( $\geq 2$ -fold) relative to 20\_GR\_12. A  $\geq 13$ -fold increase in expression was observed for *pmrH*  
326 and  $\geq 8$ -fold elevation for *pmrK*. Similar trends for expression were also reported using qRT-PCR (Figure 5).

327

### 328 **Discussion**

329 XDR *K. pneumoniae* infections pose as a major threat to modern medicine. A rapid diagnostic would help to guide  
330 appropriate treatment options [1, 6]. The MinION sequencing technology employed in this study has potential to detect  
331 antibiotic resistance in a timely manner. Three of the four *K. pneumoniae* isolates examined in this study harboured  
332 non-susceptibility to all antibiotics or antibiotic combinations assayed, and hence would be classified as PDR  
333 according to published guidelines [50]. ONT sequencing was able to resolve both the assembly of plasmids harbouring  
334 high levels of resistance (through DNA sequencing) and the expression from the resistome in the absence of antibiotic  
335 treatment (via RNA sequencing).

336 The ability for ONT to sequence long fragments of DNA has significantly aided the assembly of bacterial genomes  
337 and plasmids [16-18]. In this study, multiple megaplasmids ( $\geq 100$  kbp) were identified which were previously  
338 unresolved via Illumina sequencing [28]. These harboured replicons IncA/C2 or a dual replicon, IncFIIK and IncFIB.  
339 The IncA/C, IncF and IncN plasmids have been commonly associated with multidrug resistance [51]. Although several  
340 plasmids in this study revealed similarity to previously reported isolates via NCBI, various sequences deviated. In  
341 particular, the IncA/C2 plasmid exhibited multiple regions unique to these isolates. Several IncA/C2 megaplasmids  
342 have been previously described which harbour various resistance genes. However, the extent of resistance observed  
343 in our study is extreme when compared to prior reports [52, 53]. Prior studies have shown the IncFIIK and IncFIB  
344 replicons to localise on the same plasmid and also megaplasmids with multidrug resistance [6]. The IncFIB<sub>pQil</sub> plasmid  
345 in this study contained various  $\beta$ -lactam resistance genes (*blaKPC-2*, *blaOXA-9*, *blaTEM-1A*) which has been  
346 identified previously [54]. Similarly, *blaOXA-48* segregated with the IncL/M replicon [55,56], however, deviations in  
347 this plasmid were identified.

348 The real-time analysis capability entailed in MinION sequencing has the potential to rapidly determine antibiotic  
349 resistance profiles of pathogenic bacteria. Previously this device has been utilised to assemble bacterial genomes,  
350 discern species and detect antibiotic resistance [12-15]. This study investigated the potential time required to discern  
351 resistance via a real-time emulation as previously described [14]. The majority ( $\geq 70\%$ ) of resistance genes were  
352 detected via DNA sequencing within 2 hours. Several genes not identified in the final assembly were detected after 2  
353 hours of sequencing. This may be attributed to the high similarity ( $\geq 80\%$ ) amongst various genes, in particular, those  
354 associated with aminoglycoside,  $\beta$ -lactam, rifampicin and phenicol resistance. Furthermore, the error rate associated  
355 with ONT sequencing, and the accumulation of these errors over time, may result in the false annotation of these  
356 genes. Nanopore DNA sequencing currently has an accuracy ranging from 85 to 95% (90% in our study), which limits  
357 its ability to detect genomic variations [17, 57]. Several resistance genes only differ by a few nucleotides which  
358 significantly impacts the resistance phenotype and the antibiotics which can be utilised to treat these infections.  
359 However, software tools such as Nanopolish (<https://github.com/jts/nanopolish>) and Tombo  
360 (<https://github.com/nanoporetech/tombo>) (similarly used to re-train Chiron v0.5 for direct RNA sequencing data) have  
361 the potential to correct these reads and would be helpful to integrate to increase the accuracy of detecting resistance  
362 genes. We utilised native DNA sequencing in this study which retains epigenetic modifications such as methylation  
363 which can hinder the accuracy of reads and subsequent calling of antibiotic resistance [58]. Furthermore, a small



364 number of resistance genes were identified that were not present in the final assembly, however these all had MAPQ  
365 values less than 10 and less than 30 mapped reads. Some of these may be due to low-level kit contamination, while  
366 some of the false positives have sequence similarity to true positives and may be due to inaccuracies in base-calling.  
367 We further investigated the transcriptome of these isolates to potentially elucidate the correlation between genotype  
368 and the subsequent resistant phenotype. Detection of antibiotic resistance via sequencing commonly uses DNA due to  
369 the instability of RNA and the lengthy sample processing such as rRNA depletion [12-15, 58]. However, RNA  
370 provides additional information regarding the functionality of genes such as identifying conditions in which a  
371 resistance gene is present but not active which gives rise to a false positive via DNA alone. Conversely, if expression  
372 is only induced in the presence of an antibiotic, the absence of RNA transcripts results in a false negative. This study  
373 grew *K. pneumoniae* strains in the absence of antibiotic and direct RNA sequencing revealed high levels of  
374 transcription from genes associated with aminoglycoside,  $\beta$ -lactam, sulphonamide and trimethoprim resistance within  
375 6 hours of our study. In particular, the highest levels of expression were observed for the  $\beta$ -lactamase gene *blaKPC-2*  
376 in 2\_GR\_12 and 20\_GR\_12. Alterations in the promoter region have previously been reported to influence high levels  
377 of expression [59]. Notably, the promoter or operon (co-transcribed genes) can largely influence expression of genes.  
378 The detection of quinolone, rifampicin, and phenicol resistance correlated to the levels of transcription within samples.  
379 All isolates exhibited low levels of expression for fosfomycin, macrolide and tetracycline resistance, despite exhibiting  
380 phenotypic resistance to fosfomycin and tetracycline [28]. FosA, an enzyme involved in fosfomycin degradation, is  
381 commonly encoded chromosomally in *K. pneumoniae* and a combination of expression and enzymatic activity  
382 contributes to resistance [60]. Notably, Klontz *et al* identified that chromosomally integrated FosA, similarly  
383 observed in our study, from *K. pneumoniae* harboured a higher catalytic efficiency. A higher catalytic efficiency may  
384 reason why our strains only require a low abundance of expression and still retain fosfomycin resistance. Genes *tet(A)*  
385 and *tet(G)* encode efflux pumps which, in the absence of tetracycline, are lowly expressed and the lack of antibiotic  
386 supplementation in this study confirms this observation [61]. Detecting inducible resistance (antibiotic exposure  
387 required for gene expression) such as tetracycline resistance highlights one of the advantages of investigating the  
388 transcriptome.

389 There are several other variables to consider when interpreting expression levels in bacterial RNA sequencing data.  
390 These include the extent prior exposure to antibiotics in the clinic alters transcription and the copy number of resistance  
391 genes and the plasmids these are encoded on. Limitations were observed when base-calling bacterial direct RNA

392 sequencing and may be attributed to trimming the long artificial poly(A) tail and interference of RNA modifications.  
393 This entailed an increased error rate of  $\leq 23\%$  across base-callers (12% identified in a prior study [21]) and a poor  
394 alignment rate  $\leq 23\%$ . Furthermore, the time required to detect resistance may be hindered by the slower translocation  
395 speed associated with direct RNA sequencing (70 bases/ second) compared to DNA sequencing (450 bases/ second)  
396 [57]. Our findings show that the slower time-to-detection of resistance genes in direct RNA sequencing was due to  
397 both the level of expression as well as the slower translocation speed, and hence using cDNA would only partially  
398 overcome this limitation

399 We also investigated pathways attributed to polymyxin resistance. Three of these strains exhibited an IS element  
400 upstream of within *mgrB*, the negative regulator of PhoPQ [29]. Elevated expression was apparent for *phoPQ* and also  
401 the *pmrHFIJKLM* operon in our polymyxin-resistant isolates harbouring a disruption in *mgrB*. This has previously  
402 been witnessed for other *K. pneumoniae* isolates harbouring *mgrB* disruptions and is a potential transcriptional marker  
403 for polymyxin resistance [29, 46, 62, 63]. However, this study is limited to four isolates and one mechanism associated  
404 with polymyxin resistance. Other pathways have previously been identified including the role of other two component  
405 regulatory systems such as CrrAB [64]. The ability to use relative expression of key genes to detect polymyxin  
406 resistance requires further validation, including an increased sample size of resistant and non-resistant isolates.  
407 Furthermore, additional functional experiments such as complementation assays would be required in order to validate  
408 the contribution of a certain mutation to the transcriptome and subsequent resistance.

409

## 410 **Conclusions**

411 This study has utilised MinION sequencing to assemble four XDR *K. pneumoniae* genomes and has revealed several  
412 unique plasmids harbouring multidrug resistance. The vast majority of this resistance was detectable within 2 hours  
413 of sequencing. Exploiting this analysis in real-time would allow for a rapid diagnostic, however, the presence of a  
414 resistance gene does not necessarily indicate resistance is conferred and requires additional phenotypic  
415 characterisation. This research also established a methodology and analysis for bacterial direct RNA sequencing. The  
416 expression of resistance genes were successfully detected via this technology and can be exploited for bacterial  
417 transcriptomics. Once base-calling algorithms have been optimised, this could allow for a whole transcriptome  
418 interrogation of full-length transcripts regulated by operons, where more than one gene is co-expressed in a transcript,  
419 and the evaluation of the poorly characterised RNA modifications. Overall, this study has begun to unravel the

420 association between genotype, transcription and subsequent resistant phenotype in these XDR/ PDR *K. pneumoniae*  
421 clinical isolates, establishing the groundwork for developing a diagnostic that can rapidly determine bacterial  
422 resistance profiles.

423

#### 424 **Availability of supporting data**

425 The datasets supporting the results presented here are available in the National Center for Biotechnology Information  
426 repository BioProject PRJNA307517 ([www.ncbi.nlm.nih.gov/bioproject/PRJNA307517](http://www.ncbi.nlm.nih.gov/bioproject/PRJNA307517)). ONT DNA sequencing  
427 data has been deposited on the Sequence Read Archive ([www.ncbi.nlm.nih.gov/sra/](http://www.ncbi.nlm.nih.gov/sra/)) under study SRP133040.  
428 Accession numbers are as follows: 1\_GR\_13 (SRR6747887), 2\_GR\_12 (SRR6747886), 16\_GR\_13 (SRR6747885)  
429 and 20\_GR\_12 (SRR6747884). ONT direct RNA sequencing data (pass and fail reads) have been deposited on the  
430 Sequence Read Archive ([www.ncbi.nlm.nih.gov/sra/](http://www.ncbi.nlm.nih.gov/sra/)) under study SRP133040. Accession numbers are as follows:  
431 1\_GR\_13 (SRR7719054), 2\_GR\_12 (SRR7719055), 16\_GR\_13 (SRR7719052) and 20\_GR\_12 (SRR7719053).

#### 432 **Abbreviations**

433 Ara4N: 4-amino-4-deoxy-L-arabinose; caMHB: cation-adjusted Muller Hinton Broth; CLSI: Clinical & Laboratory  
434 Standards Institute; CI: Confidence interval; cpm: counts per million; EUCAST: The European Committee on  
435 Antimicrobial Susceptibility Testing; FDR: False discovery rate; HMW: High molecular weight; IS: Insertion  
436 sequence; LB: Lysogeny broth; MAPQ: Mapping quality; MIC: Minimum inhibitory concentration; NCBI: National  
437 Center for Biotechnology Information; ONT: Oxford Nanopore Technologies; PDR: Pandrug-resistant; RAST: Rapid  
438 Annotation using Subsystem Technology; rRNA: Ribosomal RNA; XDR: Extensively drug-resistant.

#### 439 **Competing Interests**

440 The authors declare that there are no competing interests.

#### 441 **Funding**

442 LJMC is an NHMRC career development Fellow APP1103384. MAC is an NHMRC Principal Research Fellow  
443 (APP1059354) and currently holds a fractional Professorial Research Fellow appointment at the University of  
444 Queensland with his remaining time as CEO of Inflazome Ltd. a company headquartered in Dublin, Ireland that is  
445 developing drugs to address clinical unmet needs in inflammatory disease by targeting the inflammasome. MEP is an  
446 Australian Postgraduate Award scholar. MATB is supported in part by a Wellcome Trust Strategic Award

447 104797/Z/14/Z. This work was supported by the Institute for Molecular Bioscience Centre for Superbug Solutions  
448 (610246).

#### 449 **Author Contributions**

450 MEP, LJMC, MATB and MAC conceived this study. MEP, SHN and HT performed the sequencing analysis.  
451 Laboratory work was carried out by MEP and TPSD. MEP wrote the paper with input from all authors.

452

#### 453 **Acknowledgements**

454 We would like to acknowledge Dr Ilias Karaiskos and Dr Helen Giamarellou for providing the bacterial strains in this  
455 study. We also acknowledge Dr Evangelos Bellos for his guidance on the RNA sequencing analysis and Dr Devika  
456 Ganesamoorthy for the initial advice on the direct RNA sequencing library preparation. We would like to acknowledge  
457 Dr Intawat Nookaew for providing yeast direct RNA sequence data.

458

#### 459 **References**

- 460 1. Martin RM, Bachman MA. Colonization, Infection, and the Accessory Genome of *Klebsiella pneumoniae*.  
461 *Front Cell Infect Microbiol*. 2018;8:4.
- 462 2. Magill SS, Edwards JR, Bamberg W, et al. Multistate point-prevalence survey of health care-associated  
463 infections *N Engl J Med*. 2014;370:1198-208.
- 464 3. Kalanuria AA, Ziai W, Mirski, M. Ventilator-associated pneumonia in the ICU. *Crit Care*. 2014;18:208.
- 465 4. Talha KA, Hasan Z, Selina F, et al. Organisms associated with ventilator associated pneumonia in intensive  
466 care unit. *Mymensingh Med J*. 2009;18:S93-7.
- 467 5. Podschun R, Ullmann U. *Klebsiella spp* as nosocomial pathogens: epidemiology, taxonomy, typing methods,  
468 and pathogenicity factors. *Clin Microbiol Rev*. 1998;11:589-603.
- 469 6. Navon-Venezia S, Kondratyeva K, Carattoli A. *Klebsiella pneumoniae*: a major worldwide source and shuttle  
470 for antibiotic resistance. *FEMS Microbiol Rev*. 2017;41:252-75.
- 471 7. Karaiskos I, Giamarellou H. Multidrug-resistant and extensively drug-resistant Gram-negative pathogens:  
472 current and emerging therapeutic approaches. *Expert Opin Pharmacother*. 2014;15:1351-70.

473 8 Chen L, Todd R, Kiehlbauch J, et al. Notes from the Field: Pan-Resistant New Delhi Metallo-Beta-  
474 Lactamase-Producing *Klebsiella pneumoniae* - Washoe County, Nevada, 2016 *MMWR Morb Mortal Wkly*  
475 *Rep.* 2017;66:33.

476 9 Zowawi HM, Forde BM, Alfaresi M, et al. Stepwise evolution of pandrug-resistance in *Klebsiella*  
477 *pneumoniae*. *Sci Rep.* 2015;5:15082.

478 10 Sommer MOA, Munck C, Toft-Kehler RV, et al. Prediction of antibiotic resistance: time for a new preclinical  
479 paradigm? *Nat Rev Microbiol.* 2017;15:689-96.

480 11 Gardy JL, Loman NJ. Towards a genomics-informed, real-time, global pathogen surveillance system. *Nat*  
481 *Rev Genet.* 2018;19:9-20.

482 12 Lemon JK, Khil PP, Frank KM, et al. Rapid Nanopore Sequencing of Plasmids and Resistance Gene  
483 Detection in Clinical Isolates. *J Clin Microbiol.* 2017;55:3530-43.

484 13 Votintseva AA, Bradley P, Pankhurst L, et al. Same-Day Diagnostic and Surveillance Data for Tuberculosis  
485 via Whole-Genome Sequencing of Direct Respiratory Samples. *J Clin Microbiol.* 2017;55:1285-98.

486 14 Cao MD, Ganesamoorthy D, Elliott AG, et al. Streaming algorithms for identification of pathogens and  
487 antibiotic resistance potential from real-time MinION™ sequencing. *Gigascience.* 2016;5:32.

488 15 Quick J, Ashton P, Calus S, et al. Rapid draft sequencing and real-time nanopore sequencing in a hospital  
489 outbreak of *Salmonella*. *Genome Biol.* 2015;16:114.

490 16 Wick RR, Judd LM, Gorrie CL, et al. Completing bacterial genome assemblies with multiplex MinION  
491 sequencing. *Microb Genom.* 2017;3:e000132.

492 17 Li R, Xie M, Dong N, et al. Efficient generation of complete sequences of MDR-encoding plasmids by rapid  
493 assembly of MinION barcoding sequencing data. *Gigascience.* 2018;7:1-9.

494 18 George S, Pankhurst L, Hubbard A, et al. Resolving plasmid structures in Enterobacteriaceae using the  
495 MinION nanopore sequencer: assessment of MinION and MinION/Illumina hybrid data assembly  
496 approaches. *Microb Genom.* 2017;3:e000118.

497 19 Garalde, DR, Snell, EA, Jachimowicz, D, et al. Highly parallel direct RNA sequencing on an array of  
498 nanopores. *Nat Methods.* 2018;15:201-6.

499 20 Ozsolak F, Milos PM. RNA sequencing: advances, challenges and opportunities. *Nat Rev Genet.* 2011;12:  
500 87-98.

501 21 Jenjaroenpun P, Wongsurawat T, Pereira R, et al. Complete genomic and transcriptional landscape analysis  
502 using third-generation sequencing: a case study of *Saccharomyces cerevisiae* CENPK113-7D. *Nucleic Acids*  
503 *Res.* 2018;46:e38.

504 22 Workman RE, Tang A, Tang PS, et al. Nanopore native RNA sequencing of a human poly(A) transcriptome.  
505 *bioRxiv.* 2018;459529.

506 23 Moldovan N, Tombacz D, Szucs A, et al. Third-generation Sequencing Reveals Extensive Polycistronism  
507 and Transcriptional Overlapping in a *Baculovirus*. *Sci Rep.* 2018;8:8604.

508 24 Keller MW, Rambo-Martin BL, Wilson MM, et al. Direct RNA Sequencing of the Coding Complete  
509 Influenza A Virus Genome. *Sci Rep.* 2018;8:14408.

510 25 Depledge DP, Srinivas KP, Sadaoka T, et al. Direct RNA sequencing on nanopore arrays redefines the  
511 transcriptional complexity of a viral pathogen. *Nat Commun.* 2019;10:754.

512 26 Smith AM, Jain M, Mulrone L, et al. Reading canonical and modified nucleotides in 16S ribosomal RNA  
513 using nanopore direct RNA sequencing. *Plos One.* 2019;14:e0216709.

514 27 Sorek R, Cossart P. Prokaryotic transcriptomics: a new view on regulation, physiology and pathogenicity.  
515 *Nat Rev Genet.* 2010;11:9-16.

516 28 Pitt ME, Elliott AG, Cao, MD, et al. Multifactorial chromosomal variants regulate polymyxin resistance in  
517 extensively drug-resistant *Klebsiella pneumoniae*. *Microb Genom.* 2018;4:mgen1090000158.

518 29 Olaitan AO, Morand S, Rolain JM. Mechanisms of polymyxin resistance: acquired and intrinsic resistance  
519 in bacteria. *Front Microbiol.* 2014;5:643.

520 30 Teng H, Cao MD, Hall MB, et al. Chiron: translating nanopore raw signal directly into nucleotide sequence  
521 using deep learning. *GigaScience.* 2018;7:10.1093/gigascience/giy037.

522 31 Li H. Aligning sequence reads, clone sequences and assembly contigs with BWA-MEM. *arXiv.*  
523 2013;13033997.

524 32 Zankari E, Hasman H, Cosentino S, et al. Identification of acquired antimicrobial resistance genes. *J*  
525 *Antimicrob Chemother.* 2012;67:2640-4.

526 33 Lassmann T, Frings O, Sonnhammer EL. Kalign2: high-performance multiple alignment of protein and  
527 nucleotide sequences allowing external features. *Nucleic Acids Res.* 2009;37:858-65.

528 34 Allison L, Wallace CS, Yee CN. When is a string like a string? In: Artificial Intelligence and Mathematics.  
529 *Ft Lauderdale FL*. 1990.

530 35 Bankevich A, Nurk S, Antipov D, et al. SPAdes: a new genome assembly algorithm and its applications to  
531 single-cell sequencing. *J Comput Biol*. 2012;19:455-77.

532 36 Cao MD, Nguyen SH, Ganesamoorthy D, et al. Scaffolding and completing genome assemblies in real-time  
533 with nanopore sequencing. *Nat Commun*. 2017;8:14515.

534 37 Wick RR, Judd LM, Gorrie CL, et al. Unicycler: Resolving bacterial genome assemblies from short and long  
535 sequencing reads. *PLoS Comput Biol*. 2017;13:e1005595.

536 38 Koren S, Walenz BP, Berlin K, et al. Canu: scalable and accurate long-read assembly via adaptive k-mer  
537 weighting and repeat separation. *Genome Res*. 2017;27:722-36.

538 39 Li H. Minimap and minimap: fast mapping and *de novo* assembly for noisy long sequences. *Bioinformatics*.  
539 2016;32:2103-10.

540 40 Vaser R, Sovic I, Nagarajan N, et al. Fast and accurate *de novo* genome assembly from long uncorrected  
541 reads. *Genome Res*. 2017;27:737-46.

542 41 Darling AE, Tritt A, Eisen JA, et al. Mauve assembly metrics. *Bioinformatics*. 2011;27:2756-7.

543 42 Aziz RK, Bartels D, Best AA, et al. The RAST Server: rapid annotations using subsystems technology. *BMC*  
544 *Genomics*. 2008;9:75.

545 43 Carattoli A, Zankari E, Garcia-Fernandez A, et al. *In silico* detection and typing of plasmids using  
546 PlasmidFinder and plasmid multilocus sequence typing. *Antimicrob Agents Chemother*. 2014;58:3895-903.

547 44. Li H, Handsaker B, Wysoker A, et al. The sequence alignment/map format and SAMtools. *Bioinformatics*.  
548 2009;25:2078-9.

549 45 Quinlan AR. BEDTools: The Swiss-Army Tool for Genome Feature Analysis. *Curr Protoc Bioinformatics*.  
550 2014;47:11.12.1-34.

551 46 Cannatelli A, D'Andrea MM, Giani T, et al. *In vivo* emergence of colistin resistance in *Klebsiella pneumoniae*  
552 producing KPC-type carbapenemases mediated by insertional inactivation of the PhoQ/PhoP *mgrB* regulator.  
553 *Antimicrob Agents Chemother*. 2013;57:5521-6.

554 47 Robinson JT, Thorvaldsdottir H, Winckler W, et al. Integrative genomics viewer. *Nat Biotechnol*. 2011;29;  
555 24-6.

- 556 48. Robinson MD, McCarthy DJ, Smyth GK. edgeR: a Bioconductor package for differential expression analysis  
557 of digital gene expression data. *Bioinformatics*. 2010;26:139-40.
- 558 49 Livak KJ, Schmittgen TD. Analysis of relative gene expression data using real-time quantitative PCR and  
559 the 2<sup>-</sup>(-Delta Delta C(T)) Method. *Methods*. 2001;25:402-8.
- 560 50 Magiorakos AP, Srinivasan A, Carey RB, et al. Multidrug-resistant, extensively drug-resistant and pandrug-  
561 resistant bacteria: an international expert proposal for interim standard definitions for acquired resistance.  
562 *Clin Microbiol Infect*. 2012;18,268–81.
- 563 51 Carattoli A. Resistance plasmid families in Enterobacteriaceae. *Antimicrob Agents Chemother*. 2009;53:  
564 2227-38.
- 565 52 Desmet S, Nepal S, van Dijl JM, et al. Antibiotic Resistance Plasmids Cointegrated into a Megaplasmid  
566 Harboring the *bla*OXA-427 Carbapenemase Gene. *Antimicrob Agents Chemother*. 2018;62:e01448-17.
- 567 53 Papagiannitsis CC, Dolejska M, Izdebski R, et al. Characterisation of IncA/C2 plasmids carrying an In416-  
568 like integron with the *bla*VIM-19 gene from *Klebsiella pneumoniae* ST383 of Greek origin. *Int J Antimicrob*  
569 *Agents*. 2016;47:158-62.
- 570 54 Chen L, Chavda KD, Melano RG, et al. Comparative genomic analysis of KPC-encoding pKpQIL-like  
571 plasmids and their distribution in New Jersey and New York Hospitals. *Antimicrob Agents Chemother*.  
572 2014;58:2871-7.
- 573 55 Poirel L, Bonnin RA, Nordmann P. Genetic features of the widespread plasmid coding for the carbapenemase  
574 OXA-48. *Antimicrob Agents Chemother*. 2012;56:559-62.
- 575 56 Potron A, Poirel L, Nordmann P. Derepressed transfer properties leading to the efficient spread of the plasmid  
576 encoding carbapenemase OXA-48. *Antimicrob Agents Chemother*. 2014;58:467-71.
- 577 57 Rang FJ, Kloosterman WP, de Ridder J. From squiggle to basepair: computational approaches for improving  
578 nanopore sequencing read accuracy. *Genome Biol*. 2018;19:90.
- 579 58 Tamma PD, Fan Y, Bergman Y, et al. Applying rapid whole-genome sequencing to predict phenotypic  
580 antimicrobial susceptibility testing results among carbapenem-resistant *Klebsiella pneumoniae* clinical  
581 isolates. *Antimicrob Agents Chemother*. 2018;63: pii: e01923-18.
- 582 59 Cheruvanky A, Stoesser N, Sheppard AE, et al. Enhanced *Klebsiella pneumoniae* Carbapenemase Expression  
583 from a Novel Tn4401 Deletion. *Antimicrob Agents Chemother*. 2017;61:e00025-17.



584 60 Klontz EH, Tomich AD, Gunther S, et al. Structure and Dynamics of FosA-Mediated Fosfomycin Resistance  
585 in *Klebsiella pneumoniae* and *Escherichia coli*. *Antimicrob Agents Chemother.* 2017;61:e01572-17.

586 61 Saenger W, Orth P, Kisker C, et al. The Tetracycline Repressor-A Paradigm for a Biological Switch. *Angew  
587 Chem Int Ed Engl.* 2000;39;2042-52.

588 62 Cheng YH, Lin TL, Pan YJ, et al. Colistin resistance mechanisms in *Klebsiella pneumoniae* strains from  
589 Taiwan. *Antimicrob Agents Chemother.* 2015;59:2909-13.

590 63 Haeili M, Javani A, Moradi J, et al. MgrB Alterations Mediate Colistin Resistance in *Klebsiella pneumoniae*  
591 Isolates from Iran. *Front Microbiol.* 2017;8:2470.

592 64 Baron S, Hadjadj L, Rolain JM, et al. Molecular mechanisms of polymyxin resistance: knowns and  
593 unknowns. *Int J Antimicrob Agents.* 2017;48:583-91.

594  
595  
596  
597  
598  
599  
600  
601  
602  
603  
604  
605  
606  
607  
608  
609  
610  
611

612 **Table and Figure Legends**

613

614

615 **Table 1:** Final assembly of XDR *K pneumoniae* isolates and location of antibiotic resistance genes

| Isolate  | ST  | Contig | Length (bp)    | Coverage | Contig ID*                                           | Resistance Genes**                                                                                                                                |
|----------|-----|--------|----------------|----------|------------------------------------------------------|---------------------------------------------------------------------------------------------------------------------------------------------------|
| 1_GR_13  | 147 | 1      | <b>5181675</b> | 1        | C                                                    | <i>blaSHV-11, fosA, oqxA, oqxB</i>                                                                                                                |
|          |     | 2      | <b>192771</b>  | 1.95     | P: IncA/C2                                           | <i>aadA1, ant(2'')-Ia, aph(6)-Id, ARR-2, blaOXA-10, blaTEM-1B, blaVEB-1, cmlA1, dfrA14, dfrA23, rmtB, strA, sul1, sul2, tet(A), tet(G)</i>        |
|          |     | 3      | <b>168873</b>  | 2        | P: IncFIB <sub>pKpn3</sub> , IncFII <sub>pKP91</sub> | <i>aadA24, aph(3')-Ia, aph(6)-Id, dfrA1, dfrA14, strA</i>                                                                                         |
|          |     | 4      | <b>108879</b>  | 1.53     | P: IncFIB <sub>pKPHS1</sub>                          | -                                                                                                                                                 |
|          |     | 5      | <b>55018</b>   | 14.10    | -                                                    | -                                                                                                                                                 |
|          |     | 6      | <b>53495</b>   | 2.36     | P: IncR, IncN                                        | <i>aadA24, aph(3')-Ia, aph(6)-Id, blaVIM-27, dfrA1, mph(A), strA, sul1</i>                                                                        |
| 2_GR_12  | 258 | 1      | <b>5466424</b> | 1        | C                                                    | <i>blaSHV-11, fosA, oqxA, oqxB</i>                                                                                                                |
|          |     | 2      | 197872         | 1.3      | P: IncFIB <sub>pKpn3</sub> , IncFIIK                 | <i>aadA2, aph(3')-Ia, catA1, dfrA12, mph(A), sul1</i>                                                                                             |
|          |     | 3      | 175636         | 1.49     | P: IncA/C2                                           | <i>aadA1, ant(2'')-Ia, aph(3'')-Ib, aph(6)-Id, ARR-2, blaOXA-10, blaTEM-1A, blaVEB-1, cmlA1, dfrA14, dfrA23, rmtB, sul1, sul2, tet(A), tet(G)</i> |
|          |     | 4      | 95481          | 1.61     | P: IncFIB <sub>pQil</sub>                            | <i>blaKPC-2, blaOXA-9, blaTEM-1A</i>                                                                                                              |
|          |     | 5      | <b>43380</b>   | 1.91     | P: IncX3                                             | <i>blaSHV-12</i>                                                                                                                                  |
|          |     | 6      | <b>13841</b>   | 4        | P: ColRNAI                                           | <i>aac(6')-Ib, aac(6')Ib-cr</i>                                                                                                                   |
| 16_GR_13 | 11  | 1      | <b>5426917</b> | 1        | C                                                    | <i>blaSHV-11, fosA, oqxA, oqxB</i>                                                                                                                |
|          |     | 2      | <b>187670</b>  | 0.88     | P: IncFIB <sub>pKpn3</sub> ; IncFIIK                 | <i>aac(3)-IIa, aac(6')Ib-cr, aadA2, aph(3')-Ia, blaCTX-M-15, blaOXA-1, catB4, dfrA12, mph(A), sul1</i>                                            |
|          |     | 3      | <b>155161</b>  | 0.99     | P: IncA/ C2                                          | <i>aadA1, ant(2'')-Ia, aph(3'')-Ib, aph(6)-Id, ARR-2, blaOXA-10, blaTEM-1B, blaVEB-1, cmlA1, rmtB, sul1, sul2, tet(A), tet(G)</i>                 |
|          |     | 4      | <b>63589</b>   | 1.49     | P: IncL/ M <sub>pOXA-48</sub>                        | <i>blaOXA-48</i>                                                                                                                                  |
|          |     | 5      | <b>5234</b>    | 188.49   | -                                                    | -                                                                                                                                                 |
|          |     | 6      | <b>4940</b>    | 97.77    | P: ColRNAI                                           | -                                                                                                                                                 |
| 20_GR_12 | 258 | 1      | <b>5395894</b> | 1        | C                                                    | <i>blaSHV-11, fosA, oqxA, oqxB</i>                                                                                                                |
|          |     | 2      | <b>170467</b>  | 1.77     | P: IncFIB <sub>pKpn3</sub> ; IncFIIK                 | <i>aph(3')-Ia, blaKPC-2, blaOXA-9, blaTEM-1A</i>                                                                                                  |
|          |     | 3      | <b>50979</b>   | 1.42     | P: IncN                                              | <i>aph(3'')-Ib, aph(6)-Id, blaTEM-1A, dfrA14, sul2, tet(A)</i>                                                                                    |
|          |     | 4      | <b>43380</b>   | 1.78     | P: IncX3                                             | <i>blaSHV-12</i>                                                                                                                                  |
|          |     | 5      | <b>13841</b>   | 10.82    | P: ColRNAI                                           | <i>aac(6')-Ib, aac(6')Ib-cr</i>                                                                                                                   |

616 \*Contig ID represents chromosome (C) or plasmid (P): replicon determined via PlasmidFinder 1.3.

617 \*\*Resistance genes identified using ResFinder 3.0 ( $\geq 90\%$  sequence similarity,  $\geq 60\%$  minimum length) and displayed618 in alphabetical order. **Bold** indicates a circular contig.

619

620 **Figure 1:** Time required to detect antibiotic resistance genes via the real-time emulation analysis using MinION DNA  
621 and direct RNA sequencing. (A) 1\_GR\_13, (B) 2\_GR\_12, (C) 16\_GR\_13 and (D) 20\_GR\_12. Legend colours identify  
622 the class of antibiotic to which the gene confers resistance, / on y-axis indicates reads detected more than one resistance  
623 gene and # is a family of genes detected (>3). An asterisk (\*) indicates the inability for direct RNA sequencing to  
624 detect this gene. Albacore 2.2.7. base-called sequences were used and all reads (pass and fail) were included in this  
625 analysis.

626 **Figure 2:** Direct RNA sequencing expression of resistance genes aligned to completed genomes expressed as counts  
627 per million mapped reads (post removal of reads mapping to rRNA). (A) 1\_GR\_13, (B) 2\_GR\_12, (C) 16\_GR\_13  
628 and (D) 20\_GR\_12. X-axis depicts the resistance genes and are grouped based on the location in the genome where P  
629 indicates a plasmid followed by replicon identity. Albacore 2.2.7 base-called pass and fail reads were used for analysis.  
630 Dotted line is set to 300 cpm.

631 **Figure 3:** Correlation between resistance genes detected via direct RNA sequencing and validated using qRT-PCR.  
632 Relative expression was calculated via normalizing to the housekeeping gene, *rpsL* for both direct RNA sequencing  
633 ( $\log_2(\text{gene}/rpsL)$ ) and qRT-PCT ( $2^{-\Delta\Delta CT}$ ). Due to high similarity between certain genes, several primers recognise more  
634 than one gene. These include *aac(6')Ib*: *aac(6')Ib-cr*, *aadA24*; *strA*: *aph(3'')-Ib* and *blaTEM-1*: *blaTEM-1A*, *blaTEM-*  
635 *1B*.

636 **Figure 4:** Correlation between the four XDR *K pneumoniae* isolates for gene expression via direct RNA sequencing.  
637 Top panels display spearman correlation coefficients. The diagonal panel shows the density of gene expression levels  
638 in counts per million mapped reads for each sample (post removal of rRNA mapped reads). Bottom panels depict the  
639 correlation of gene expression between isolates as a scatter plot. Colours indicate categorization of gene: antimicrobial  
640 resistance genes (AMR) as per ResFinder 3.0, virulence genes (VIR) determined via RAST and all other genes or  
641 background genes (BG) are displayed. Cpm was capped at 2000.

642 **Figure 5:** Expression of genes associated with the polymyxin resistance pathway. Comparison between direct RNA  
643 sequencing (solid shapes without asterisk) and qRT-PCR (solid shapes with asterisk). Direct RNA sequencing data is  
644 calculated as  $\log_2(\text{gene}/rpsL)$  and qRT-PCR as  $\text{gene}/rpsL$ . All isolates except 20\_GR\_12 harboured resistance to  
645 polymyxin (MIC: >2  $\mu\text{g}/\text{mL}$ ). The bars indicate the average of qRT-PCR and direct RNA sequencing.

[Click here to view linked References](#)

1 **Evaluating the Genome and Resistome of Extensively Drug-Resistant *Klebsiella pneumoniae***  
2 **using Native DNA and RNA Nanopore Sequencing**

3  
4 Miranda E. Pitt<sup>1</sup>, Son H. Nguyen<sup>1</sup>, Tânia P.S. Duarte<sup>1</sup>, Haotian Teng<sup>1</sup>, Mark A.T. Blaskovich<sup>1</sup>, Matthew A. Cooper<sup>1</sup>,  
5 Lachlan J.M. Coin<sup>1</sup>

6 <sup>1</sup> Institute for Molecular Bioscience, The University of Queensland, Brisbane, Queensland, 4072, Australia

7 Corresponding authors: Miranda Pitt (miranda.pitt@imb.uq.edu.au, ORCID: 0000-0002-8255-4036) and Lachlan

8 Coin (l.coin@imb.uq.edu.au, ORCID: 0000-0002-4300-455X)

9

10 **Abstract**

11 **Background:** *Klebsiella pneumoniae* frequently harbours multidrug resistance and current diagnostics struggle to  
12 rapidly identify appropriate antibiotics to treat these bacterial infections. The MinION device can sequence native  
13 DNA and RNA in real-time, providing an opportunity to compare the utility of DNA and RNA for prediction of  
14 antibiotic susceptibility. However, the effectiveness of bacterial direct RNA sequencing and base-calling has not  
15 previously been investigated. This study interrogated the genome and transcriptome of four extensively drug-resistant  
16 (XDR) *K. pneumoniae* clinical isolates, however, further antimicrobial susceptibility testing identified three isolates  
17 as pandrug-resistant (PDR).

18 **Results:** The majority of acquired resistance ( $\geq 75\%$ ) resided on plasmids including several megaplasmids ( $\geq 100$  kbp).  
19 DNA sequencing detected most resistance genes ( $\geq 70\%$ ) within 2 hours of sequencing. Neural-network based base-  
20 calling of direct RNA achieved up to 86% identity rate, although ~~only~~  $\leq 23\%$  of reads could be aligned. Direct RNA  
21 sequencing (with approximately 6 times slower pore translocation) was able to identify (within 10 hours)  $\geq 35\%$  of  
22 resistance genes, including those associated with resistance to aminoglycosides,  $\beta$ -lactams, trimethoprim and  
23 sulphonamide and also quinolones, rifampicin, fosfomycin and phenicol in some isolates. Polymyxin-resistant isolates  
24 showed a heightened transcription of *phoPQ* ( $\geq 2$ -fold) and the *pmrHFIIKLM* operon ( $\geq 8$ -fold). Expression levels  
25 estimated from direct RNA sequencing displayed strong correlation (Pearson: 0.86) compared to qRT-PCR across  
26 eleven resistance genes.

27 **Conclusion:** Overall, MinION sequencing rapidly detected the XDR/ PDR *K. pneumoniae* resistome and direct RNA  
28 sequencing ~~provided/revealed differential~~ accurate estimation of expression levels of these genes.

29 **Introduction**

30 *Klebsiella pneumoniae* is one of the leading causes of nosocomial infections, with reports of mortality rates as high  
31 as 50% [1-5]. This opportunistic pathogen commonly exhibits multidrug resistance which severely limits treatment  
32 options [6]. A high abundance of resistance is ~~frequently~~ commonly encoded on plasmids, accounting for the rapid  
33 global dissemination of resistance [1,6]. Common therapeutic options for multidrug-resistant infections include  
34 carbapenems, fosfomycin, tigecycline and polymyxins [7]. However, resistance is also rapidly developing against  
35 these antibiotics resulting in the emergence of extensively drug-resistant (XDR) and subsequent pandrug-resistant  
36 (PDR) strains [6-9].

37 One of the major contributors to the advent of antibiotic resistance is the inability for current detection methodologies  
38 to readily and accurately assess bacterial infections in particular, the resistance profile [10]. Rapid sequencing has  
39 been proposed as a way to determine antibiotic resistance, including approaches which utilise high accuracy short  
40 reads, as well as those which exploit real-time single-molecule sequencing such as Oxford Nanopore Technologies  
41 (ONT). The ONT MinION platform is a portable single-molecule sequencer which can sequence long fragments of  
42 DNA and stream the sequence data for further data processing in real-time, detecting the presence of bacterial species  
43 and acquired resistance genes [11-15]. Moreover, the long reads coupled with the ability to multiplex samples has  
44 immensely aided with the assembly of bacterial genomes [16-18]. This capability allows for the rapid determination  
45 of whether resistance is residing on the chromosome or plasmid/s. Of particular interest are high levels of resistance  
46 encoded on plasmids, as these genes can rapidly be transferred throughout the bacterial population via horizontal gene  
47 transfer. However, a limitation of DNA sequencing is accurately identifying whether the presence of an acquired  
48 resistance gene or mutation is facilitating resistance.

49 ONT has recently released a direct RNA sequencing capability, which sequences native transcripts. Other sequencing  
50 technologies rely on fragmentation, cDNA conversion and PCR steps that create experimental bias and hinder the  
51 accuracy of determining gene expression [19, 20]. The ability for MinION sequencing to read long fragments enables  
52 full length transcripts to be investigated. To date, only a few direct RNA sequencing publications exist which include  
53 eukaryote transcriptomes, primarily yeast (*Saccharomyces cerevisiae* [19, 21]) and recently, *Homo sapiens* [22]. This  
54 sequencing has additionally been implemented in viral transcriptomics [23-25]. Only one prior study by Smith AM *et*

55 *al.* has applied this sequencing to bacterial 16S ribosomal RNA (rRNA) to detect ~~RNA~~epigenetic modifications [26].  
56 Notably, resistance to certain antibiotics, such as aminoglycosides, can arise via RNA modifications which are unable

57 to be detected once RNA is converted to cDNA [26]. Furthermore, library preparation time is halved for direct RNA  
58 sequencing due to the absence of cDNA synthesis. Bacterial transcription differs significantly from eukaryotes in that  
59 transcription and translation occur simultaneously. As a result, bacterial mRNA transcripts lack poly(A) tails and  
60 alternative splicing, however, genes can be co-transcribed if regulated via an operon [27]. The poly(A) tail is critical  
61 for the library preparation for ONT sequencing thus, we have established a methodology for adding this component  
62 onto transcripts.

63 In this study, we applied MinION sequencing to interrogate both the genome and the transcriptome (via direct RNA  
64 sequencing) for XDR *K. pneumoniae* clinical isolates. Of interest was to compare the potential for RNA sequencing  
65 to provide a better correlation to the resistance phenotype than DNA sequencing. These isolates have previously  
66 undergone 'traditional' whole genome sequencing (Illumina) and antimicrobial susceptibility testing [28]. An  
67 extended panel of antibiotics was tested in this study to identify PDR isolates. Three strains were selected from this  
68 cohort which exhibited resistance to all 24 antibiotics or antibiotic combinations tested, a high abundance of antibiotic  
69 resistance genes ( $\geq 26$ ) and differing lineages (ST11 (16\_GR\_13), ST147 (1\_GR\_13) and ST258 (2\_GR\_12)).  
70 Additionally, these isolates harbour polymyxin resistance which is facilitated by a disruption in or upstream of *mgrB*.  
71 Variations in the *mgrB* gene result in increased expression of the *pmrCAB* and *pmrHFJKLM* operon, enables the  
72 addition of phosphoethanolamine and/ or 4-amino-4-deoxy-L-arabinose (Ara4N) to lipid A and subsequently  
73 facilitates polymyxin resistance [29]. These pathways associated with polymyxin resistance were further explored  
74 using direct RNA sequencing and compared against a polymyxin-susceptible XDR isolate (ST258; 20\_GR\_12). This  
75 research aimed to assemble these genomes, discern ~~the differential~~ expression of resistance genes and ascertain the  
76 time required for detection. Furthermore, we sought to compare DNA and RNA sequencing as modalities for the rapid  
77 identification of acquired antibiotic resistance.

78

## 79 **Methods**

### 80 ***Bacterial strains and growth conditions***

81 XDR *K. pneumoniae* clinical strains were sourced through the Hygeia General Hospital, Athens, Greece [28].  
82 Antimicrobial susceptibility assays (Supplementary Table S1), sequence typing and detection of acquired resistance  
83 genes have previously been determined [28]. Strains were stored at -80°C in 20% (v/v) glycerol, the identical stock  
84 was used as per the prior study and the extended panel of antimicrobial susceptibility testing conducted similarly [28].

Formatted: Not Highlight

85 When required for extractions, glycerol stocks were grown on lysogeny broth (LB) agar-plates and 6 morphologically  
86 similar colonies were selected for inoculation. The inoculum was grown in LB overnight at 37°C shaking at 220 rpm.  
87 This overnight inoculum was used for both DNA and RNA extractions.

#### 88 ***HDNA extraction and high molecular weight DNA isolation***

89 DNA was extracted from 10 ml of overnight culture using the DNeasy Blood and Tissue Kit (Qiagen) according to  
90 manufacturer's guidelines, with the addition of an enzymatic lysis buffer pre-treatment (60 mg/ml lysozyme).

91 ~~Following the DNeasy extraction, high molecular weight (HMW) DNA was isolated from the prior extraction was~~  
92 ~~selected~~ using the MagAttract HMW DNA Kit (Qiagen) as per manufacturer's instructions. ~~Subtle changes~~  
93 ~~included an additional a further~~ proteinase K treatment ~~on the DNA extracts~~ at 56°C for 10 min followed by  
94 supplementation of RNase A (1 mg) for 15 min at room temperature was included to increase DNA purity. Several  
95 direct extractions from bacterial overnight cultures using the HMW kit were performed, however, low DNA yield was  
96 observed and the initial DNeasy extraction was essential. An additional purification step following the HMW DNA  
97 extraction was critical for 2 GR\_12 as several attempts at direct DNA extraction from bacterial cells were undertaken  
98 using the MagAttract HMW DNA kit, however, were unsuccessful with these isolates. Due to several issues with  
99 potential carbohydrate contamination (260/230 ratio:  $\leq 0.3$ ) was identified potentially due to a thickened capsule. This  
100 purification included, 2 GR\_12 was also purified with the Monarch<sup>®</sup> PCR & DNA Cleanup Kit (New England  
101 BioLabs) using the protocol to isolate fragments >2000 bp.

102 ~~DNA and RNA contamination was quantitated using Qubit@2.0 (Thermo Fisher Scientific) and purity determined~~  
103 ~~with a NanoDrop 1000 Spectrophotometer (Thermo Fisher Scientific). DNA fragment sizes were determined using~~  
104 ~~the Genomic DNA ScreenTape & Reagents (Agilent) and sizes from 200 to >60000 bp were analyzed on a 4200~~  
105 ~~TapeStation System (Agilent) (Supplementary Figure S1).~~

#### 106 ***RNA extraction, mRNA enrichment and poly(A) addition***

107 The overnight ~~inoculum culture~~ was sub-cultured in 10 ml of cation-adjusted Muller Hinton Broth (caMHB) to reflect  
108 ~~the mediae conditions~~ used for minimum inhibitory concentration (MIC) assays. Cultures were grown to mid-log phase  
109 ( $OD_{600} = 0.5-0.6$ ). RNA was extracted via the PureLink<sup>™</sup> RNA Mini Kit (Thermo Fisher Scientific) as per  
110 manufacturer's protocols which included using Homogenizer columns (Thermo Fisher Scientific). To remove DNA  
111 contamination, the TURBO DNA-free<sup>™</sup> kit was implemented. A minor adjustment was an increased concentration  
112 of TURBO DNase (4 U) incubated at 37°C for 30 min. The RNeasy Mini Kit (Qiagen) clean up protocol was

113 ~~additionally~~ used to purify and concentrate RNA samples. Ribosomal RNA was depleted via the MICROBExpress™  
114 Bacterial mRNA Enrichment Kit (Thermo Fisher Scientific). Minor protocol changes included adding  $\geq 2$   $\mu\text{g}$  of DNA  
115 depleted RNA and the enriched mRNA was precipitated for 3 h at  $-20^\circ\text{C}$ . Poly(A) addition was performed using the  
116 Poly(A) Polymerase Tailing Kit (Astral Scientific) as per the manufacturer's alternative protocol (4 U input of Poly(A)  
117 Polymerase). The input RNA concentration was  $\geq 800$  ng and RNA samples were incubated at  $37^\circ\text{C}$  for 1 h. Poly(A)  
118 ligated RNA was purified using Agencourt AmpureXP (Beckman Coulter Australia) beads (1:1 ratio). ~~RNA and DNA~~  
119 ~~contamination was quantitated using the Qubit@2.0 (Thermo Fisher Scientific) and purity determined with a NanoDrop~~  
120 ~~1000 Spectrophotometer (Thermo Fisher Scientific). RNA fragment size was checked using an Agilent RNA 6000~~  
121 ~~Pico kit and run on a 2100 Bioanalyzer (Agilent Technologies) for the initial RNA extract, post ribosomal RNA~~  
122 ~~depletion and after poly(A) ligation (Supplementary Figure S2).~~

### 123 *Extraction quality control*

124 ~~DNA and RNA contamination~~ ~~were~~ quantitated using Qubit@2.0 (Thermo Fisher Scientific) and purity determined  
125 ~~with a NanoDrop 1000 Spectrophotometer (Thermo Fisher Scientific). DNA fragment sizes were~~ ~~measured~~ ~~determined~~  
126 ~~using the Genomic DNA ScreenTape & Reagents (Agilent) and sizes from 200 to  $>60000$  bp were analyzed on a 4200~~  
127 ~~TapeStation System (Agilent) (Supplementary Figure S1).~~  
128 ~~RNA and DNA contamination was quantitated using the Qubit@2.0 (Thermo Fisher Scientific) and purity determined~~  
129 ~~with a NanoDrop 1000 Spectrophotometer (Thermo Fisher Scientific). RNA fragment size was checked using an~~  
130 ~~Agilent RNA 6000 Pico kit and run on a 2100 Bioanalyzer (Agilent Technologies) for the initial RNA extract (RIN:~~  
131  ~~$\geq 8.5$ ), post ribosomal RNA depletion and after poly(A) ~~tailing~~ ligation (Supplementary Figure S2).~~

### 133 *ONT library preparation and sequencing*

134 RNA libraries ( $\geq 600$  ng poly(A)<sup>-</sup> ~~ligated~~ RNA) were prepared using the Direct RNA Sequencing kit (SQK-RNA001).  
135 The Rapid Barcoding Sequencing kit (SQK-RBK001) was used for HMW DNA samples (1\_GR\_13, 16\_GR\_13,  
136 20\_GR\_12; 300 ng input each). Isolate 2\_GR\_12 (300 ng input) was prepared separately using the Rapid Sequencing  
137 Kit (SQK-RAD003). Libraries were sequenced with MinION R9.4 flowcells and the raw data (fast5 files) were base-  
138 called using Albacore 2.1.1 for DNA sequencing (Supplementary Figure S3). For benchmarking purposes, RNA reads  
139 were additionally base-called with Albacore 2.2.7, Guppy 3.0.3 and the Chiron v0.5 [30] RNA base-caller which was  
140 trained in-house (<https://github.com/haotianteng/Chiron/releases/tag/v0.5>).

Formatted: Font: Not Bold, Not Italic  
Formatted: Justified



141 ***Real-time resistome detection emulation***

142 The real-time emulation was performed post sequencing and the time required to detect antibiotic resistance was  
143 determined as previously described [14]. Briefly, this pipeline aligns Albacore base-called reads via BWA-MEM [31]  
144 to an antibiotic resistance gene database. Antibiotic resistance genes were obtained from the ResFinder 3.0 database  
145 [32]. This dataset comprises of 2131 genes which were clustered based on 90% identity to form 611 groups or gene  
146 families. The detection of false positives is reduced using the multiple sequence alignment software kalign2 [33], a  
147 probabilistic Finite State Machine [34] and once the alignment score reached a threshold, the resistance gene was  
148 reported.

149 ***Assembly of genomes***

150 To assemble genomes with both Illumina and ONT reads, SPAdes v3.10.1 [35] was ~~utilised~~implemented. Hybrid  
151 assemblers included npScarf [36] and Unicycler v0.3.1 [37]. Assemblers using only ONT reads included Canu v1.5  
152 (excluding reads <500bp) [38] and the combination of Minimap2 v2.1-r311 and Miniasm v0.2-r168-dirty; Racon (git  
153 commit 834442) were used in both cases to polish the assemblies [39, 40]. Consensus sequences were determined  
154 using Mauve (snapshot\_2015-02-13) to construct the final assembly [41]. The output from each assembly software is  
155 reported in Supplementary Table S2. Genomes were annotated using the Rapid Annotation using Subsystem  
156 Technology (RAST) which also provided a list of virulence genes [42]. The location of acquired antibiotic resistance  
157 genes were determined using ResFinder 3.0 [32] and plasmids were identified via PlasmidFinder 1.3 [43]. To discern  
158 if plasmid sequences have previously been reported, contigs underwent a BLASTn analysis against the National  
159 Center for Biotechnology Information (NCBI) database (<https://blast.ncbi.nlm.nih.gov/Blast.cgi>).

160 ***RNA alignment and expression profiling***

161 Base-called RNA reads were converted to DNA (uracil bases changed to thymine) and aligned using BWA-MEM  
162 [31] to the updated genome assemblies. BWA-MEM was selected due to shorter transcripts being produced by bacteria  
163 (Supplementary Figure S3) and the lack of introns and alternative splicing. Similar parameters to the BWA-MEM  
164 ont2d function were used, but seed length was reduced (-k 14) to compensate for shorter reads: parameters: -k 11  
165 [minimum seed length, bp] -W20 [bandwidth] -r10 [gap extension penalty] -A1 [match score] -B1 [mismatch penalty]  
166 -O1 [Gap open penalty] -E1 [Gap extension penalty] -L0 [Clipping penalty] -Y). ~~to the updated genome~~  
167 ~~assemblies. Multi-mapping reads were removed via SAMtools (secondary alignment: flagged as 256) [44], and to the~~  
168 ~~updated genome assemblies. Due to the lack of introns and full length transcripts being obtained, BEDTools coverage~~

Formatted: Not Highlight

169 [454] was used to ascertain the relative expression of resistance genes in counts per million (cpm) mapped reads (post  
170 removing reads mapping to rRNA). To compare against qRT-PCR results, read counts were normalised. This was  
171 normalized to the number of counts obtained for the housekeeping gene, *rpsL* [465], to compare against qRT-PCR  
172 results or counts per million mapped reads (post removing reads mapping to rRNA). Read alignments were further  
173 visualised using Integrative genomics viewer 2.3.59 [467].

#### 174 **Whole transcriptome differential gene expression and estimation of expression confidence intervals:**

175 We identified genes which were differentially expressed in one sample (versus all remaining samples) using a quasi-  
176 likelihood F-test in EdgeR [48] with a FDR threshold of 0.01. Expression levels (in cpmounts per million) were  
177 extracted for every significant gene in any one of these one versus remaining differential expression analyses in order  
178 to generate an expression heatmap. The expression heatmap is based on the  $\log_{10}(\text{cpm})$  for each of these genes.  
179 In order to estimate the 90% confidence intervals in cpmounts per million estimates from direct RNA sequence data,  
180 we assumed that the observed counts were generated from a binomial distribution with unobserved probability of  
181 success ( $p$ ). We estimate the 5% and 95% percentiles from a beta-distribution with shape parameters equal to the  
182 number of reads mapped to a given gene ( $\alpha$ ) and the number of reads mapped elsewhere ( $\beta$ ) plus a pseudo-  
183 count of 0.1. The 90% confidence interval (CI) is calculated as the difference between the expression levels at the  
184 5% and 95% percentile. To identify genes which were differentially expressed between a pair of samples ( $x$  and  $y$ ),  
185 we used a beta-binomial distribution to calculate the probability of observing less than or equal to  $x_g$  reads mapping  
186 to gene  $g$  in sample  $x$ , conditional on the total number of reads mapping to all genes ( $\text{sum}_g(x_g)$ ), the number of  
187 reads in sample  $y$  mapping to gene  $g$  ( $y_g$ ) as well as the total number of reads mapping to all genes in sample  $y$   
188 ( $\text{sum}_g(y_g)$ ). This was calculated in R using the `pbetabinom.ab` function in the VGAM package, with  $q = x_g / \text{size}$   
189  $= \text{sum}_g(x_g)$ ,  $\alpha = y_g + 1$ ;  $\beta = \text{sum}_g(y_g) - y_g + 1$ . Genes for which this probability was less than a  
190 predefined threshold were deemed to be significantly under expressed in sample  $x$  given sample  $y$ . A similar statistic  
191 was used to check for over expression.

#### 192 **Quantitative real-time reverse transcriptase PCR (qRT-PCR)**

193 First strand cDNA synthesis to generate cDNA was performed on (1  $\mu\text{g}$  of total DNase-depleted RNA) was  
194 performed using SuperScript III (Thermo Fisher Scientific), which was also used for MinION direct RNA sequencing  
195 library preparations. Primers used are displayed in Supplementary Table S3. Samples were prepared in triplicate via  
196 the SYBR Select Master Mix (Thermo Fisher Scientific) and expression detected using a ViiA 7 Real-time PCR

Formatted: Not Highlight

197 system (Thermo Fisher Scientific). Cycling conditions include: Hold 50°C (2 min), 95°C (2 min) followed by 50  
198 cycles of: 95°C (15 sec), 55°C (1 min). A melt curve was included to determine the specificity of the amplification  
199 and a no template control to detect contamination or primer dimers. Results were analysed with QuantStudio™ Real-  
200 Time PCR Software, triplicates were averaged, normalised to the housekeeping gene *rpsL* [46] and relative expression  
201 determined via the  $2^{-\Delta\Delta CT}$  method [497].  
202

## 203 Results

### 204 *Antibiotic resistance and the location of acquired resistance in the genome*

205 This study assayed nine additional antibiotics or antibiotic combinations to further characterise the phenotypic  
206 resistance of these isolates (Supplementary Table S1). Strains 1\_GR\_13, 2\_GR\_12 and 16\_GR\_13 were non-  
207 susceptible to all antibiotics including the 24 antibiotics tested previously [28]. 20\_GR\_12 was only susceptible to  
208 gentamicin and polymyxins.

209 MinION DNA sequencing for all isolates was run for  $\geq 20$  hours which generated 1.19 GB (215X) for 1\_GR\_13, 0.39  
210 GB (67X) for 2\_GR\_12, 0.56 GB (101X) for 16\_GR\_13 and 0.64 GB (115X) for 20\_GR\_12 (Supplementary Table  
211 S2). Across the differing assembly tools, the chromosome sequence commonly circularised as a 5.0-5.4 Mb contig  
212 including plasmids ranging between 13-193 kb with the exception of 2\_GR\_12. Utilising the capacity for MinION  
213 sequencing to read long fragments of DNA, the location of antibiotic resistance genes were clearly resolved (Table  
214 4). Aligning ONT reads to the final assembly revealed that DNA sequencing had 90% accuracy across isolates.

215 Utilising the capacity for MinION sequencing to read long fragments of DNA, the location of antibiotic resistance  
216 genes were clearly resolved (Table 1). All genomes were circular with the exception of 2\_GR\_12 where 3 plasmids  
217 remained linear. This was partly due to difficulties extracting DNA, and not retaining long fragments and  
218 subsequently, lower coverage of the genome (Supplementary Figure S1, Table S2). Amongst the four isolates, the  
219 chromosome size ranged between 5.1-5.5 Mb which encoded resistance genes *blaSHV-11*, *fosA* and *oqxAB*. The  
220 majority of resistance ( $\geq 75\%$ ) mapped to plasmids.

221 At least one megaplasmid, defined as a plasmid larger than 100 kbp, was detected in all isolates (Table 1). These  
222 commonly harboured the replicon IncA/C2 or InFIB and IncFIIK. The IncA/C2 plasmid was present in all samples  
223 except 20\_GR\_12. This plasmid contained up to 16 resistance genes which conferred resistance towards  
224 aminoglycosides,  $\beta$ -lactams, phenicols, rifampicin, sulphonamides, tetracyclines and trimethoprim, with the exception

225 of 16\_GR\_13. Isolate 16\_GR\_13 lacked trimethoprim resistance on its IncA/C2 plasmid. The plasmids containing  
226 both replicons IncFIB and IncFIIK differed vastly between all four replicates. All contained IncFIB<sub>pKpn3</sub> and IncFIIK,  
227 however, 1\_GR\_13 differed with IncFII<sub>pKP91</sub>. Additionally, a differing IncFIB replicon was detected on a separate  
228 contig in 1\_GR\_13 (pKPHS1) and 2\_GR\_12 (pQil). The only instance where another dual replicon was identified was  
229 in 1\_GR\_13 which harboured both IncR and IncN. This plasmid contained aminoglycoside,  $\beta$ -lactam, trimethoprim,  
230 macrolide and sulphonamide resistance. 1\_GR\_13 also contained a 5.5 kb circular contig which was annotated as a  
231 phage genome. Various regions of these megaplasmids were unique to these isolates compared to prior sequences  
232 deposited on NCBI (Supplementary Table S5).

233 The ColRNAI plasmid was present in all except 1\_GR\_13 which encoded aminoglycoside and quinolone resistance  
234 (*aac(6')-Ib*, *aac(6')-Ib-cr*) (Table 1). The ColRNAI plasmid in 2\_GR\_12 and 20\_GR\_12 was 13841 bp in size and  
235 shared 75% similarity between the two isolates. This plasmid differed in 16\_GR\_13 which contained no resistance  
236 genes and 35% the size. The same IncX3 plasmid (43380 bp) was apparent in isolates 2\_GR\_12 and 20\_GR\_12.  
237 Unique to 16\_GR\_13 was the IncL/ M<sub>pOXA-48</sub> plasmid containing *blaOXA-48* and the 50979 bp IncN plasmid in  
238 20\_GR\_12 with resistance against 5 classes (aminoglycoside (*aph(3'')-Ib*, *aph(6)-Id*),  $\beta$ -lactam (*blaTEM-1A*),  
239 sulphonamide (*sul2*), tetracycline (*tet(A)*), trimethoprim (*dfrA14*)) of antibiotics.

240 Multiple copies of acquired resistance genes were apparent across plasmids in several isolates. For 1\_GR\_13, up to  
241 three copies were present of genes *aadA24*, *aph(3')-Ia*, *aph(6)-Id*, *dfrA1*, *dfrA14*, *strA* and *sul1* (Table 1). In 2\_GR\_12,  
242 *sul1* and *blaTEM-1A* were duplicated and for 16\_GR\_13, only *sul1* was represented twice.

#### 243 **Real-time detection emulation of resistance genes via DNA sequencing**

244 The vast majority ( $\geq 70\%$ ) of resistance genes were detected via DNA sequencing within the first 2 hours (Figure 1,  
245 Supplementary Table S5). These genes confer resistance towards aminoglycosides,  $\beta$ -lactams, fosfomycin,  
246 macrolides, phenicols, quinolones, rifampicin, sulphonamides, tetracyclines and trimethoprim. 20\_GR\_12 lacked  
247 acquired resistance genes for macrolides, phenicols and rifampicin, however, all other classes were detected within 2  
248 hours. All isolates, except 2\_GR\_12, were sequenced for 21 hours which was sufficient to obtain the complete genome  
249 assembly. Only a few additional genes were detected after the first 10 hours across isolates (Supplementary Table S5).  
250 For 2\_GR\_12, an extended run of 41 hours detected no further genes after 20 hours. Overall, the presence of these  
251 resistance genes corresponded to a resistant phenotype towards aminoglycosides,  $\beta$ -lactams, fosfomycin, phenicols,  
252 quinolones, sulphonamides (sulfamethoxazole), tetracyclines and trimethoprim (Supplementary Table S1). As

253 macrolides and rifampicin are not routinely used to treat *K. pneumoniae* infections, no breakpoints exist according to  
254 CLSI and EUCAST guidelines, however, all isolates exhibit an MIC  $\geq 128$   $\mu\text{g/ml}$  towards erythromycin (macrolide)  
255 and  $\geq 64$   $\mu\text{g/ml}$  for rifampicin (Supplementary Table S1).

256 Post 2 hours of sequencing, several genes not observed in the final assembly via ResFinder 3.0 were detected  
257 (Supplementary Table S5). These were predominantly genes attributed to aminoglycoside,  $\beta$ -lactam, rifampicin and  
258 phenicol resistance. Furthermore, resistance genes to additional differing classes were detected including fusidic acid  
259 and vancomycin. This was evident in 2\_GR\_12 (*fusB*) and 16\_GR\_13 (*fusB*, *vanR*). However, these genes had less  
260 than 30 reads and their phred-scale mapping quality (MAPQ) scores were less than 10 (misplaced probability greater  
261 than 0.1). Furthermore, the majority of genes not observed in the final assembly nor observed in Illumina data  
262 exhibited a MAPQ score of  $\leq 10$  which may indicate that a more stringent threshold is required to negate false positives.

263 However, if this threshold increases, true positives would not be detected including *aadA1*, *aadA2* and *ARR-2* in  
264 2\_GR\_12 and *blaOXA-48*, *blaCTX-M-15* and *ARR-2* in 16\_GR\_13.

265 Several genes found in the final assembly were not detected in the real-time emulation analysis (Supplementary Table  
266 S5). This was mainly observed for aminoglycoside resistance encoding genes. For 1\_GR\_13, this included *aadA1*,  
267 *ant(2'')-Ia*, *aph(6)-Id* and *aadA24*. Similarly, 2\_GR\_12 and 20\_GR\_12 lacked *aph(3'')-Ib* and *aph(6)-Id*. 2\_GR\_12  
268 additionally had the absence of *ant(2'')-Ia*. Detection of *ant(2'')-Ia*, *aph(3'')-Ib*, *aph(6)-Id* was not present in  
269 16\_GR\_13. 16\_GR\_13 further lacked *catB4* (phenicol) and *tet(A)* (tetracycline). Various phenicol resistance genes  
270 were reported in the real-time emulation however, the incorrect gene was identified which may represent sequencing  
271 errors accumulated over time and high similarity to other phenicol resistance genes. The tetracycline resistance gene,  
272 *tet(A)*, was interestingly not reported in this emulation with 190 reads and the majority of reads exhibiting a high  
273 mapping confidence (MAPQ = 60, equivalent to an error probability of  $1 \times 10^{-6}$ ). This gene was only detected after 10  
274 hours for 1\_GR\_13 and 2\_GR\_12 and this result may be influenced by the presence of only 1 copy of *tet(A)* encoded  
275 on a low copy number megaplasmid (between 1 to 1.5, see Table 1).

#### 276 **Direct RNA sequencing resistance detection**

277 The time required to detect resistance was further interrogated using RNA sequencing. Rapid detection was possible  
278 for several resistance genes via direct RNA sequencing (Figure 1). This was evident for genes conferring resistance  
279 to aminoglycosides,  $\beta$ -lactams, sulphonamides and trimethoprim for all four isolates. Resistance towards these  
280 antibiotics was commonly detected within 6 hours. In some instances, quinolone, rifampicin, fosfomycin and phenicol

281 resistance was detected. A similar result was obtained whether all reads or passed reads alone were analysed. The  
282 most significant difference when analysing all reads was the detection of *fosA* in 1\_GR\_13 and *ARR-2* and *fosA* in  
283 2\_GR\_12. Consistently absent from this analysis were genes attributed to macrolide (*mph(A)*) and tetracycline (*tet(A)*,  
284 *tet(G)*) resistance, however, isolates exhibited high levels of resistance to tetracycline (>64 µg/ml) (Supplementary  
285 Table S1). ~~This may indicate that isolates require antibiotic exposure to enable transcription of these genes.~~ Commonly  
286 no new genes were detected after 12 hours of sequencing with the exception of *fosA* in 2\_GR\_12. Although *fosA* was  
287 detected when including the failed reads, a low MAPQ score ( $\leq 10$ ) was apparent. Similar to the DNA real-time  
288 detection, several genes not found in the final assembly were identified (Supplementary Table S5). With the exception  
289 of 20\_GR\_12, this included *aadB* and *strB* for all isolates. Additional genes detected included *ARR-7* in 1\_GR\_13,  
290 *strA* in 2\_GR\_12 and for 16\_GR\_13, *blaCTX-M-64*, *blaOXA-436* and *strA*. Similar genes or gene families were  
291 identified when comparing DNA and direct RNA sequencing. Overall, genes were detected more readily via DNA  
292 ~~sequencing however, there were rather than RNA sequencing, possibly due to a lack of RNA expression in the absence~~  
293 ~~of the antibiotic to which resistance is encoded. There were only~~ a few instances where RNA sequencing detected  
294 resistance ~~quicker more quickly than DNA sequencing~~: *aac(3)-IIa* in 16\_GR\_13 and *sul2* and *cataI* in 2\_GR\_12.  
295 Similar results were observed when investigating data yield rather than time ~~which compensates for the slower~~  
296 ~~translocation speed associated with direct RNA sequencing~~ (Supplementary Figure S4).

### 297 **Levels of expression of resistance genes**

298 RNA sequencing accumulated over approximately 40 hours yielded between 0.9 and 1.7 million reads for these  
299 isolates (Supplementary Figure S3). However, only a low proportion ( $\leq 14.64\%$ ) of these reads passed base-calling  
300 using Albacore 2.2.7 (Supplementary Table S6). Aligning passed reads alone to the final assembly,  $\geq 98\%$  of reads  
301 were mappable, however,  $\leq 40\%$  of these had a MAPQ score  $\geq 10$ . When all reads (pass and fail) were aligned, the  
302 majority were not mappable to the reference genome ( $\geq 76.69\%$ ) and commonly exhibited a low MAPQ score ( $\leq 10$ ).  
303 ~~Low mapping quality could be attributed to assignment of reads to multiple copies of genes in the genome.~~  
304 ~~Furthermore, the ONT error rates could lead to misassignment of reads to genes.~~ In light of this, we decided to  
305 benchmark a number of different base-callers, including Albacore 2.2.7, Guppy 3.03 as well as Chiron v0.5 which  
306 was trained in-house (Supplementary Table S6, Figure S5). Chiron base-called more reads compared to Albacore 2.2.7  
307 and Guppy 3.0.3, however, fewer reads aligned to the reference genome and had a slightly lower identity rate. ~~Albacore~~  
308 ~~2.2.7 had the highest average accuracy across isolates (84.87%) closely followed by Guppy 3.0.3 (84.62%) and then~~

309 [Chiron v0.5 \(78.19%\) \(Supplementary Table S6\)](#). These results reflect the fact that base-calling algorithms have not  
310 yet been optimised for direct RNA sequencing, and even less so for bacterial RNA sequencing. The poly(A) length  
311 was commonly found to be approximately 400 to 700 bp across isolates (Supplementary Figure S6). Taking into  
312 consideration the Albacore 2.2.7 base-called reads, a proportion of these reads were found to map to rRNA including  
313 1\_GR\_13 (18%), 2\_GR\_12 (37%), 16\_GR\_13 (24%) and 20\_GR\_12 (23%). Overall, at least 58% of genes (with at  
314 least 1 read mapping to the gene) were identified to be expressed across isolates (1\_GR\_13 (68%), 2\_GR\_12 (58%),  
315 16\_GR\_13 (75%) and 20\_GR\_12 (69%).

316 Amongst the four isolates, levels of expression for resistance genes on the chromosome (*blaSHV-11*, *fosA* and *oqxAB*)  
317 were low ( $\leq 122$  counts per million mapped reads (~~cpm~~)) (Figure 2). The remaining resistance genes were located on  
318 plasmids. Resistance genes exhibiting high levels of expression (300 cpm) were apparent in 1\_GR\_13 (*blaTEM-1B*,  
319 *blaVIM-27*, *sul1*, *aph(3')-Ia*), 2\_GR\_12 (*aac(6')-Ib*, *catA1*, *blaKPC-2*), 16\_GR\_13 (*aac(6')Ib-cr*, *aac(3)-IIa*, *blaCTX-*  
320 *M-15*, *blaTEM-1B*, *blaOXA-48*) and 20\_GR\_12 (*blaKPC-2*, *aac(6')Ib*). Counts for *aac(6')-Ib* and *aac(6')-Ib-cr* in  
321 2\_GR\_12 and 20\_GR\_12 were grouped. The gene *aac(6')-Ib-cr* is a shortened version of *aac(6')-Ib* and both were  
322 identified in the same genome position, hence, only *aac(6')-Ib* is displayed in Figure 2. [Relative expression](#)  
323 [Expression estimates](#) did not differ significantly when analysing passed reads alone or all reads. [We estimated the](#)  
324 [90% confidence interval in cpm estimates using a beta-distribution \(Supplementary Figure S7-figure ...\)](#). -All highly  
325 expressed genes were detected within 6 hours as per the real-time detection emulation. As anticipated, low levels of  
326 expression were observed for fosfomycin (*fosA*), tetracycline (*tet(A)*, *tet(B)*) and macrolide (*mph(A)*) resistance.

327 A subset of 11 resistance genes which represent resistance across various classes of antibiotics were investigated to  
328 validate ~~differential~~ gene expression in these RNA extractions via qRT-PCR (Figure 3). These included resistance  
329 towards aminoglycosides (*aac(6')Ib*, *strA*),  $\beta$ -lactams (*blaKPC-2*, *blaOXA-10*, *blaTEM-1*), phenicols (*cmlA1*),  
330 trimethoprim (*dfpA14*), fosfomycin (*fosA*), quinolone (*oqxA*), sulphonamides (*sul2*) and tetracyclines (*tet(A)*). A  
331 similar trend was observed between direct RNA sequencing and qRT-PCR results (Spearman's rank correlation  
332 coefficient: 0.83; Pearson correlation: 0.86) (Figure 3). The highest expression of a resistance gene was observed for  
333 *blaKPC-2* although only one copy was present in a lower copy number plasmid in 2\_GR\_12 and 20\_GR\_12 (Figure  
334 2, Figure 3 and Table 1). Additionally, low levels of expression for *fosA* and *tet(A)* were apparent despite exhibiting  
335 resistance towards fosfomycin and tetracycline (Figure 3, Supplementary Table S1). Direct RNA sequencing was  
336 unable to detect low levels of expression whilst qRT-PCR could detect these genes (Figure 3).

337 Across the transcriptome, antibiotic resistance genes were identified to harbour high ~~differential~~ expression between  
338 isolates (Figure 4). Virulence genes were comparable across these strains similar to all remaining or background genes.  
339 The top differentially expressed genes were determined (Supplementary Figure S87) and several were associated with  
340 polymyxin resistance pathways. Heightened expression was seen in polymyxin-resistant isolates 1\_GR\_13, 2\_GR\_12,  
341 16\_GR\_13 in comparison to the single susceptible isolate (20 GR 12) in particular, genes associated with Ara4N  
342 synthesis. These genes include 4-deoxy-4-formamido-L-arabinose-phosphoundecaprenol deformylase (*arnD*), UDP-  
343 4-amino-4-deoxy-L-arabinose formyltransferase and UDP-4-amino-4-deoxy-L-arabinose-oxoglutarate  
344 aminotransferase.

#### 345 **Transcriptional biomarkers for polymyxin resistance**

346 Three of the isolates harboured resistance towards polymyxins via disruptions in *mgrB* which included 1\_GR\_13,  
347 2\_GR\_12 and 16\_GR\_13. 1\_GR\_13. ~~Isolate 1 GR 13 has~~~~These isolates have~~ an insertion sequence (IS) element,  
348 IS*Kpn26*-like, at nucleotide position 75 in the same orientation as *mgrB* ~~whilst~~. 2\_GR\_12 ~~has this IS element in the~~  
349 ~~opposite orientation plus also contained an insertion at the same position, however, in the opposite orientation and~~  
350 additional mutations in *phoP* (A95S) and *phoQ* (N253T). 16\_GR\_13 ~~harbours~~~~possessed~~ an IS element, IS*IR*-like, 19  
351 bp upstream of *mgrB*. Direct RNA sequencing revealed only ~~low level~~~~low-level~~ expression of *mgrB* ~~in isolates~~  
352 (1\_GR\_13 (78.4 cpm), 2\_GR\_12 (16.3 cpm), 16\_GR\_13 (0 cpm), 20\_GR\_12 (2.3 cpm)). The expression levels of  
353 various genes associated with this pathway were verified via qRT-PCR ~~which include genes~~ *phoP*, *phoQ*, *pmrA*, *pmrB*,  
354 *pmrC*, *pmrD*, *pmrE*, *pmrH* and *pmrK* (Figure 5). Direct RNA sequencing revealed a slight increase in transcription of  
355 *phoPQ* ( $\geq 2$ -fold) relative to ~~the expression in~~ 20\_GR\_12. A  $\geq 13$ -fold increase in expression was observed for *pmrH*  
356 and  $\geq 8$ -fold elevation for *pmrK*. Similar trends for expression were also reported using qRT-PCR (Figure 5B).

357

#### 358 **Discussion**

359 XDR *K. pneumoniae* infections pose as a major threat to modern medicine. A rapid diagnostic would help to guide  
360 appropriate treatment options [1, 6]. The MinION sequencing technology employed in this study has potential to detect  
361 antibiotic resistance in a timely manner. Three of the four *K. pneumoniae* isolates examined in this study harboured  
362 non-susceptibility to all antibiotics or antibiotic combinations assayed, and hence would be classified as PDR  
363 according to published guidelines [5048]. ONT sequencing was able to resolve both the assembly of plasmids



364 harbouring high levels of resistance (through DNA sequencing) and the expression from the resistome in the absence  
365 of antibiotic treatment (via RNA sequencing).

366 The ability for ONT to sequence long fragments of DNA has significantly aided the assembly of bacterial genomes  
367 and plasmids [16-18]. In this study, multiple megaplastids ( $\geq 100$  kbp) were identified which were previously  
368 unresolved via Illumina sequencing [28]. These harboured replicons IncA/C2 or a dual replicon, IncFIIK and IncFIB.

369 The IncA/C, IncF and IncN plasmids have been commonly associated with multidrug resistance [51,48]. Although  
370 several plasmids in this study revealed similarity to previously reported isolates via NCBI, various sequences deviated.

371 In particular, the IncA/C2 plasmid exhibited multiple regions unique to these isolates. Several IncA/C2 megaplastids  
372 have been previously described which harbour various resistance genes. However, the extent of resistance observed  
373 in our study is extreme when compared to prior reports [520, 534]. Prior studies have shown the IncFIIK and IncFIB  
374 replicons to localise on the same plasmid and also megaplastids with multidrug resistance [6]. The IncFIB<sub>p<sub>QII</sub></sub> plasmid  
375 in this study contained various  $\beta$ -lactam resistance genes (*blaKPC-2*, *blaOXA-9*, *blaTEM-1A*) which has been  
376 identified previously [542]. Similarly, *blaOXA-48* segregated with the IncL/M replicon [553,564], however,  
377 deviations in this plasmid were identified.

378 The real-time analysis capability entailed in MinION sequencing has the potential to rapidly determine antibiotic  
379 resistance profiles of pathogenic bacteria. Previously this device has been utilised to assemble bacterial genomes,  
380 discern species and detect antibiotic resistance [12-15]. This study investigated the potential time required to discern  
381 resistance via a real-time emulation as previously described [14]. The majority ( $\geq 70\%$ ) of resistance genes were  
382 detected via DNA sequencing within 2 hours. Several genes not identified in the final assembly were detected after 2  
383 hours of sequencing. This may be attributed to the high similarity ( $\geq 80\%$ ) amongst various genes, in particular, those  
384 associated with aminoglycoside,  $\beta$ -lactam, rifampicin and phenicol resistance. Furthermore, the error rate associated  
385 with ONT sequencing, and the accumulation of these errors over time, may result in the false annotation of these  
386 genes. Nanopore DNA sequencing currently has an accuracy ranging from 850 to 950% (90% in our study), which  
387 limits its ability to detect genomic variations [17, 57]. Several resistance genes only differ by a few nucleotides which  
388 significantly impacts the resistance phenotype and the antibiotics which can be utilised to treat these infections.  
389 However, software tools such as Nanopolish (<https://github.com/jts/nanopolish>) and Tombo  
390 (<https://github.com/nanoporetech/tombo>) (similarly used to re-train Chiron v0.5 for direct RNA sequencing data) have  
391 the potential to correct these reads and would be helpful to integrate to increase the accuracy of detecting resistance

392 genes. We utilised native DNA sequencing in this study which retains epigenetic modifications such methylation  
393 which can hinder the accuracy of reads and subsequent calling of antibiotic resistance [58]. Furthermore, a small  
394 number of resistance genes were identified that were not present in the final assembly, however these all had MAPQ  
395 values less than 10 and less than 30 mapped reads. Some of these may be due to low-level kit contamination, while  
396 some of the false positives have sequence similarity to true positives and may be due to inaccuracies in base-calling.  
397 We further investigated the transcriptome of these isolates to potentially elucidate the correlation between genotype  
398 and the subsequent resistant phenotype. Detection of antibiotic resistance via sequencing commonly uses DNA due to  
399 the instability of RNA and the lengthy sample processing such as rRNA depletion [12-15, 58]. However, RNA  
400 provides additional information regarding the functionality of genes such as identifying conditions in which a  
401 resistance gene is present but not active which gives rise to a false positive via DNA alone. Conversely, if expression  
402 is only induced in the presence of an antibiotic, the absence of RNA transcripts results in a false negative. This study  
403 grew *K. pneumoniae* strains in the absence of antibiotic and ~~Several resistance genes only differ by a few nucleotides~~  
404 ~~which significantly impacts the resistance phenotype and the antibiotics which can be utilised to treat these infections.~~  
405 ~~Furthermore, direct RNA sequencing has an average error rate of 12% [21]. Hence, it is essential for the technology~~  
406 ~~to increase its accuracy in order to correctly and rapidly diagnose antibiotic resistance.~~  
407 ~~Investigating the transcriptome of these isolates can potentially elucidate the correlation between genotype and the~~  
408 ~~subsequent resistant phenotype. One of the advantages of RNA sequencing is that it can identify conditions in which~~  
409 ~~a resistance gene is present but not expressed, potentially resulting in a susceptible phenotype. However, if expression~~  
410 ~~is only induced in the presence of an antibiotic, the absence of RNA transcripts may falsely suggest susceptibility.~~  
411 ~~Direct RNA sequencing revealed high levels of transcription from genes associated with aminoglycoside,  $\beta$ -lactam,~~  
412 ~~sulphonamide and trimethoprim resistance within 6 hours of our study. In particular, the highest levels of expression~~  
413 ~~were observed for the  $\beta$ -lactamase gene *blaKPC-2* in 2 GR 12 and 20 GR 12. Alterations in the promoter region~~  
414 ~~have previously been reported to influence high levels of expression [59]. Notably, the promoter or operon (co-~~  
415 ~~transcribed genes) can largely influence expression of genes. The detection of quinolone, rifampicin, and phenicol~~  
416 ~~resistance correlated to the levels of transcription within samples. All isolates exhibited low levels of expression for~~  
417 ~~fosfomycin, macrolide and tetracycline resistance, despite exhibiting phenotypic resistance to fosfomycin and~~  
418 ~~tetracycline [28]. *FosA*, an enzyme involved in fosfomycin degradation, is commonly encoded chromosomally in *K.*~~  
419 ~~*pneumoniae* and a combination of expression and enzymatic activity contributes to resistance [60]. Notably, Klontz~~

Formatted: Not Highlight

Formatted: Font: Italic

420 *et al* identified that chromosomally integrated FosA, similarly observed in our study, from *K. pneumoniae* harboured  
421 a higher catalytic efficiency. A higher catalytic efficiency may reason why our strains only require a low abundance  
422 of expression and still retain fosfomycin resistance. Genes *tet(A)* and *tet(G)* encode efflux pumps which, in the absence  
423 of tetracycline, are lowly expressed and the lack of antibiotic supplementation in this study confirms this observation  
424 [61]. Detecting inducible resistance (antibiotic exposure required for gene expression) such as tetracycline resistance  
425 highlights one of the advantages of investigating the transcriptome.

426 There are several other variables to consider when interpreting expression levels in bacterial RNA sequencing data.  
427 These include the extent prior exposure to antibiotics in the clinic alters transcription and the copy number of resistance  
428 genes and the plasmids these are encoded on. Limitations were observed when base-calling bacterial direct RNA  
429 sequencing and may be attributed to trimming the long artificial poly(A) tail and interference of RNA modifications.  
430 This entailed an increased error rate of  $\leq 23\%$  across base-callers (12% identified in a prior study [21]) and a poor  
431 alignment rate  $\leq 23\%$ . Whether this transcription is due to prior exposure to these antibiotics in the clinic and the  
432 longevity of this expression post exposure warrants further investigation. The changes in transcription levels in  
433 response to antibiotic exposure also need to be assessed in future experiments. Furthermore, the time required to detect  
434 resistance may be hindered by the slower translocation speed associated with direct RNA sequencing (70 bases/  
435 second) compared to DNA sequencing (450 bases/ second) [57]. Our findings show that the slower time-to-detection  
436 of resistance genes in direct RNA sequencing was due to both the level of expression as well as the slower translocation  
437 speed, and hence using cDNA would only partially overcome this limitation

438 Furthermore, direct RNA sequencing has an average error rate of 12% [21]. Hence, it is essential for the technology  
439 to increase its accuracy in order to correctly and rapidly diagnose antibiotic resistance.

440 Furthermore, insufficient rRNA depletion and low base-calling of data could be impacting the detection of this low  
441 level expression.

442 Another variable to consider when evaluating differential expression is the operon or promoter which can further be  
443 explored via cloning. In particular, the highest levels of expression were observed for *blaKPC 2* in 2\_GR\_12 and  
444 20\_GR\_12. Alterations in the promoter region have previously been reported to influence high levels of expression  
445 [55]. Furthermore, despite low levels of transcription for fosfomycin (*fosA*) and tetracycline (*tet(A)*, *tet(G)*),  
446 phenotypically these isolates consistently retain resistance [28]. FosA, an enzyme involved in the degradation of  
447 fosfomycin, is commonly encoded chromosomally in *K. pneumoniae* and a combination of expression and enzymatic

448 activity contributes to resistance [56]. Genes *tet(A)* and *tet(G)* encode efflux pumps which, in the absence of  
449 tetracycline, are lowly expressed [57]. Detecting inducible resistance such as tetracycline resistance highlights one of  
450 the advantages of investigating the transcriptome. Additionally, copy number of plasmids can further alter the levels  
451 of expression detected for these resistance genes.

452 In this study we also investigated pathways attributed to polymyxin resistance. Three of these strains exhibited an  
453 IS element upstream of within *mgrB*, the negative regulator of PhoPQ [29]. Elevated expression was apparent for  
454 *phoPQ* and also the *pmrHFIIKLM* operon in our polymyxin-resistant isolates harbouring a disruption in *mgrB*. This  
455 has previously been witnessed for other *K. pneumoniae* isolates harbouring *mgrB* disruptions and is a potential  
456 transcriptional marker for polymyxin resistance [29, 464, 6258, 6359]. However, this study is limited to four isolates  
457 and one mechanism associated with polymyxin resistance. Other pathways have previously been identified including  
458 the role of other two component regulatory system TCSs such as CrrAB [640]. The ability to use relative expression  
459 of key genes to detect polymyxin resistance requires further validation, including an increased sample size of resistant  
460 and non-resistant isolates. Furthermore, additional functional experiments such as complementation assays would be  
461 required in order to validate the contribution of a certain mutation to the transcriptome and subsequent resistance.

462

## 463 **Conclusions**

464 This study has utilised MinION sequencing to assemble four XDR *K. pneumoniae* genomes and has revealed several  
465 unique plasmids harbouring multidrug resistance. The vast majority of this resistance was detectable within 2 hours  
466 of sequencing. ~~Although a small number of resistance genes were identified that were not present in the final assembly,~~  
467 ~~however these all had MAPQ values less than 10 and a small number of mapped reads. Some of these may be due to~~  
468 ~~low-level kit contamination, while some of the false positives have sequence similarity to true positives and may be~~  
469 ~~due to inaccuracies in base calling.~~ Exploiting this analysis in real-time would allow for a rapid diagnostic, however,  
470 the presence of a resistance gene does not necessarily indicate resistance is conferred and requires additional  
471 phenotypic characterisation. This research also established a methodology and analysis for bacterial direct RNA  
472 sequencing. The ~~differential~~ expression of resistance genes were successfully detected via this technology and can be  
473 exploited for bacterial transcriptomics. Once base-calling algorithms have been optimised, this could allow for a whole  
474 transcriptome interrogation of full-length full-length transcripts regulated by operons, where more than one gene is co-  
475 expressed in a transcript, and the evaluation of the poorly characterised RNA modifications ~~epitranscriptome~~. ~~This~~

476 ~~research established a methodology and analysis for bacterial direct RNA sequencing. The differential expression of~~  
477 ~~resistance genes were successfully detected via this technology and can be exploited for bacterial transcriptomics.~~

478 Overall, this study has begun to unravel the association between genotype, transcription and subsequent resistant  
479 phenotype in these XDR/ PDR *K. pneumoniae* clinical isolates, establishing the groundwork for developing a  
480 diagnostic that can rapidly determine bacterial resistance profiles.

481

#### 482 **Availability of supporting data**

483 The datasets supporting the results presented here are available in the National Center for Biotechnology Information  
484 repository BioProject PRJNA307517 ([www.ncbi.nlm.nih.gov/bioproject/PRJNA307517](http://www.ncbi.nlm.nih.gov/bioproject/PRJNA307517)). ONT DNA sequencing  
485 data has been deposited on the Sequence Read Archive ([www.ncbi.nlm.nih.gov/sra/](http://www.ncbi.nlm.nih.gov/sra/)) under study SRP133040.  
486 Accession numbers are as follows: 1\_GR\_13 (SRR6747887), 2\_GR\_12 (SRR6747886), 16\_GR\_13 (SRR6747885)  
487 and 20\_GR\_12 (SRR6747884). ONT direct RNA sequencing data (pass and fail reads) have been deposited on the  
488 Sequence Read Archive ([www.ncbi.nlm.nih.gov/sra/](http://www.ncbi.nlm.nih.gov/sra/)) under study SRP133040. Accession numbers are as follows:  
489 1\_GR\_13 (SRR7719054), 2\_GR\_12 (SRR7719055), 16\_GR\_13 (SRR7719052) and 20\_GR\_12 (SRR7719053).

#### 490 **Abbreviations**

491 Ara4N: 4-amino-4-deoxy-L-arabinose; caMHB: cation-adjusted Muller Hinton Broth; CLSI: Clinical & Laboratory  
492 Standards Institute; CI: Confidence interval; cpm: counts per million; EUCAST: The European Committee on  
493 Antimicrobial Susceptibility Testing; FDR: False discovery rate; HMW: High molecular weight; IS: Insertion  
494 sequence; LB: Lysogeny broth; MAPQ: Mapping quality; MIC: Minimum inhibitory concentration; NCBI: National  
495 Center for Biotechnology Information; ONT: Oxford Nanopore Technologies; PDR: Pandrug-resistant; RAST: Rapid  
496 Annotation using Subsystem Technology; rRNA: Ribosomal RNA; XDR: Extensively drug-resistant.

#### 497 **Competing Interests**

498 The authors declare that there are no competing interests.

#### 499 **Funding**

500 LJMC is an NHMRC career development Fellow APP1103384. MAC is an NHMRC Principal Research Fellow  
501 (APP1059354) and currently holds a fractional Professorial Research Fellow appointment at the University of  
502 Queensland with his remaining time as CEO of Inflazome Ltd. a company headquartered in Dublin, Ireland that is  
503 developing drugs to address clinical unmet needs in inflammatory disease by targeting the inflammasome. MEP is an

504 Australian Postgraduate Award scholar. MATB is supported in part by a Wellcome Trust Strategic Award  
505 104797/Z/14/Z. This work was supported by the Institute for Molecular Bioscience Centre for Superbug Solutions  
506 (610246).

#### 507 **Author Contributions**

508 MEP, LJMC, MATB and MAC conceived this study. MEP, SHN and HT performed the sequencing analysis.  
509 Laboratory work was carried out by MEP and TPSD. MEP wrote the paper with input from all authors.

510

#### 511 **Acknowledgements**

512 We would like to acknowledge Dr Ilias Karaikos and Dr Helen Giamarellou for providing the bacterial strains in this  
513 study. We also acknowledge Dr Evangelos Bellos for his guidance on the RNA sequencing analysis and Dr Devika  
514 Ganesamoorthy for the initial advice on the direct RNA sequencing library preparation. We would like to acknowledge  
515 [Dr Intawat Nookaew](#) for providing yeast direct RNA sequence data.

516

#### 517 **References**

- 518 1. Martin RM, Bachman MA. Colonization, Infection, and the Accessory Genome of *Klebsiella pneumoniae*.  
519 *Front Cell Infect Microbiol*. 2018;8:4.
- 520 2. Magill SS, Edwards JR, Bamberg W, et al. Multistate point-prevalence survey of health care-associated  
521 infections *N Engl J Med*. 2014;370:1198-208.
- 522 3. Kalanuria AA, Ziai W, Mirski, M. Ventilator-associated pneumonia in the ICU. *Crit Care*. 2014;18:208.
- 523 4. Talha KA, Hasan Z, Selina F, et al. Organisms associated with ventilator associated pneumonia in intensive  
524 care unit. *Mymensingh Med J*. 2009;18:S93-7.
- 525 5. Podschun R, Ullmann U. *Klebsiella spp* as nosocomial pathogens: epidemiology, taxonomy, typing methods,  
526 and pathogenicity factors. *Clin Microbiol Rev*. 1998;11:589-603.
- 527 6. Navon-Venezia S, Kondratyeva K, Carattoli A, *Klebsiella pneumoniae*: a major worldwide source and  
528 shuttle for antibiotic resistance. *FEMS Microbiol Rev*. 2017;41:252-75.
- 529 7. Karaikos I, Giamarellou H. Multidrug-resistant and extensively drug-resistant Gram-negative pathogens:  
530 current and emerging therapeutic approaches. *Expert Opin Pharmacother*. 2014;15:1351-70.

531 8 Chen L, Todd R, Kiehlbauch J, et al. Notes from the Field: Pan-Resistant New Delhi Metallo-Beta-  
532 Lactamase-Producing *Klebsiella pneumoniae* - Washoe County, Nevada, 2016 *MMWR Morb Mortal Wkly*  
533 *Rep.* 2017;66:33.

534 9 Zowawi HM, Forde BM, Alfaresi M, et al. Stepwise evolution of pandrug-resistance in *Klebsiella*  
535 *pneumoniae*. *Sci Rep.* 2015;5:15082.

536 10 Sommer MOA, Munck C, Toft-Kehler RV, et al. Prediction of antibiotic resistance: time for a new preclinical  
537 paradigm? *Nat Rev Microbiol.* 2017;15:689-96.

538 11 Gardy JL, Loman NJ. -Towards a genomics-informed, real-time, global pathogen surveillance system. *Nat*  
539 *Rev Genet.* 2018;19:9-20.

540 12 Lemon JK, Khil PP, Frank KM, et al. Rapid Nanopore Sequencing of Plasmids and Resistance Gene  
541 Detection in Clinical Isolates. *J Clin Microbiol.* 2017;55:3530-43.

542 13 Votintseva AA, Bradley P, Pankhurst L, et al. Same-Day Diagnostic and Surveillance Data for Tuberculosis  
543 via Whole-Genome Sequencing of Direct Respiratory Samples. *J Clin Microbiol.* 2017;55:1285-98.

544 14 Cao MD, Ganesamoorthy D, Elliott AG, et al. Streaming algorithms for identification of pathogens and  
545 antibiotic resistance potential from real-time MinION™ sequencing. *Gigascience.* 2016;5:32.

546 15 Quick J, Ashton P, Calus S, et al. Rapid draft sequencing and real-time nanopore sequencing in a hospital  
547 outbreak of *Salmonella*. *Genome Biol.* 2015;16:114.

548 16 Wick RR, Judd LM, Gorrie CL, et al. Completing bacterial genome assemblies with multiplex MinION  
549 sequencing. *Microb Genom.* 2017;3:e000132.

550 17 Li R, Xie M, Dong N, et al. Efficient generation of complete sequences of MDR-encoding plasmids by rapid  
551 assembly of MinION barcoding sequencing data. *Gigascience.* 2018;7:1-9.

552 18 George S, Pankhurst L, Hubbard A, et al. Resolving plasmid structures in Enterobacteriaceae using the  
553 MinION nanopore sequencer: assessment of MinION and MinION/Illumina hybrid data assembly  
554 approaches. *Microb Genom.* 2017;3:e000118.

555 19 Garalde, DR, Snell, EA, Jachimowicz, D, et al. Highly parallel direct RNA sequencing on an array of  
556 nanopores. *Nat Methods.* 2018;15:201-6.

557 20 Ozsolak F, Milos PM. RNA sequencing: advances, challenges and opportunities. *Nat Rev Genet.* 2011;12:  
558 87-98.

559 21 Jenjaroenpun P, Wongsurawat T, Pereira R, et al. Complete genomic and transcriptional landscape analysis  
560 using third-generation sequencing: a case study of *Saccharomyces cerevisiae* CENPK113-7D. *Nucleic Acids*  
561 *Res.* 2018;46:e38.

562 22 Workman RE, Tang A, Tang PS, et al. Nanopore native RNA sequencing of a human poly(A) transcriptome.  
563 *bioRxiv.* 2018;459529.

564 23 Moldovan N, Tombacz D, Szucs A, et al. Third-generation Sequencing Reveals Extensive Polycistronism  
565 and Transcriptional Overlapping in a *Baculovirus*. *Sci Rep.* 2018;8:8604.

566 24 Keller MW, Rambo-Martin BL, Wilson MM, et al. Direct RNA Sequencing of the Coding Complete  
567 Influenza A Virus Genome. *Sci Rep.* 2018;8:14408.

568 25 Depledge DP, [Srinivas KPPuthankalam-SK](#), Sadaoka T, et al. [DirectNative](#) RNA sequencing on nanopore  
569 arrays redefines the transcriptional complexity of a viral pathogen. *Nat Commun*.[bioRxiv](#)  
570 [20198;10:754373522](#).

571 26 Smith AM, Jain M, Mulroney L, et al. Reading canonical and modified nucleotides in 16S ribosomal RNA  
572 using nanopore direct RNA sequencing. *PLoS One*.[bioRxiv.](#) 20197;14:e0216709132274.

573 27 Sorek R, Cossart P. Prokaryotic transcriptomics: a new view on regulation, physiology and pathogenicity.  
574 *Nat Rev Genet.* 2010;11:9-16.

575 28 Pitt ME, Elliott AG, Cao, MD, et al. Multifactorial chromosomal variants regulate polymyxin resistance in  
576 extensively drug-resistant *Klebsiella pneumoniae*. *Microb Genom.* 2018;4:mgen1090000158.

577 29 Olaitan AO, Morand S, Rolain JM. Mechanisms of polymyxin resistance: acquired and intrinsic resistance  
578 in bacteria. *Front Microbiol.* 2014;5:643.

579 30 Teng H, Cao MD, Hall MB, et al. Chiron: translating nanopore raw signal directly into nucleotide sequence  
580 using deep learning. *GigaScience.* 2018;7:10.1093/gigascience/giy037.

581 31 Li H. Aligning sequence reads, clone sequences and assembly contigs with BWA-MEM. *arXiv.*  
582 2013;13033997.

583 32 Zankari E, Hasman H, Cosentino S, et al. Identification of acquired antimicrobial resistance genes. *J*  
584 *Antimicrob Chemother.* 2012;67:2640-4.

585 33 Lassmann T, Frings O, Sonnhammer EL. Kalign2: high-performance multiple alignment of protein and  
586 nucleotide sequences allowing external features. *Nucleic Acids Res.* 2009;37:858-65.



587 34 Allison L, Wallace CS, Yee CN. When is a string like a string? In: Artificial Intelligence and Mathematics.  
588 *Ft Lauderdale FL*. 1990.

589 35 Bankevich A, Nurk S, Antipov D, et al. SPAdes: a new genome assembly algorithm and its applications to  
590 single-cell sequencing. *J Comput Biol*. 2012;19:455-77.

591 36 Cao MD, Nguyen SH, Ganesamoorthy D, et al. Scaffolding and completing genome assemblies in real-time  
592 with nanopore sequencing. *Nat Commun*. 2017;8:14515.

593 37 Wick RR, Judd LM, Gorrie CL, et al. Unicycler: Resolving bacterial genome assemblies from short and long  
594 sequencing reads. *PLoS Comput Biol*. 2017;13:e1005595.

595 38 Koren S, Walenz BP, Berlin K, et al. Canu: scalable and accurate long-read assembly via adaptive k-mer  
596 weighting and repeat separation. *Genome Res*. 2017;27:722-36.

597 39 Li H. Minimap and miniasm: fast mapping and *de novo* assembly for noisy long sequences. *Bioinformatics*.  
598 2016;32:2103-10.

599 40 Vaser R, Sovic I, Nagarajan N, et al. Fast and accurate *de novo* genome assembly from long uncorrected  
600 reads. *Genome Res*. 2017;27:737-46.

601 41 Darling AE, Tritt A, Eisen JA, et al. Mauve assembly metrics. *Bioinformatics*. 2011;27:2756-7.

602 42 Aziz RK, Bartels D, Best AA, et al. The RAST Server: rapid annotations using subsystems technology. *BMC*  
603 *Genomics*. 2008;9:75.

604 43 Carattoli A, Zankari E, Garcia-Fernandez A, et al. *In silico* detection and typing of plasmids using  
605 PlasmidFinder and plasmid multilocus sequence typing. *Antimicrob Agents Chemother*. 2014;58:3895-903.

606 44. Li H, Handsaker B, Wysoker A, et al. The sequence alignment/map format and SAMtools. *Bioinformatics*,  
607 2009;25:2078-9.

608 445 Quinlan AR. BEDTools: The Swiss-Army Tool for Genome Feature Analysis. *Curr Protoc Bioinformatics*.  
609 2014;47:11.12.1-34.

610 465 Cannatelli A, D'Andrea MM, Giani T, et al. *In vivo* emergence of colistin resistance in *Klebsiella pneumoniae*  
611 producing KPC-type carbapenemases mediated by insertional inactivation of the PhoQ/PhoP *mgrB* regulator.  
612 *Antimicrob Agents Chemother*. 2013;57:5521-6.

613 476 Robinson JT, Thorvaldsdottir H, Winckler W, et al. Integrative genomics viewer. *Nat Biotechnol*. 2011;29;  
614 24-6.

Formatted: Not Highlight

Formatted: Font: Italic, Not Highlight

Formatted: Not Highlight

- 615 [48.](#) [Robinson MD, McCarthy DJ, Smyth GK. edgeR: a Bioconductor package for differential expression analysis](#)  
616 [of digital gene expression data. \*Bioinformatics\*. 2010;26:139-40.](#)
- 617 [497](#) Livak KJ, Schmittgen TD. Analysis of relative gene expression data using real-time quantitative PCR and  
618 the 2<sup>-</sup>(Delta Delta C(T)) Method. *Methods*. 2001;25:402-8.
- 619 [5048](#) Magiorakos AP, Srinivasan A, Carey RB, et al. Multidrug-resistant, extensively drug-resistant and pandrug-  
620 resistant bacteria: an international expert proposal for interim standard definitions for acquired resistance.  
621 *Clin Microbiol Infect*. 2012;18,268–81.
- 622 [5149](#) Carattoli A. Resistance plasmid families in Enterobacteriaceae. *Antimicrob Agents Chemother*. 2009;53:  
623 2227-38.
- 624 [520](#) Desmet S, Nepal S, van Dijl JM, et al. Antibiotic Resistance Plasmids Cointegrated into a Megaplasmid  
625 Harboring the *bla*OXA-427 Carbapenemase Gene. *Antimicrob Agents Chemother*. 2018;62:e01448-17.
- 626 [534](#) Papagiannitsis CC, Dolejska M, Izdebski R, et al. Characterisation of IncA/C2 plasmids carrying an In416-  
627 like integron with the *bla*VIM-19 gene from *Klebsiella pneumoniae* ST383 of Greek origin. *Int J Antimicrob*  
628 *Agents*. 2016;47:158-62.
- 629 [542](#) Chen L, Chavda KD, Melano RG, et al. Comparative genomic analysis of KPC-encoding pKpQIL-like  
630 plasmids and their distribution in New Jersey and New York Hospitals. *Antimicrob Agents Chemother*.  
631 2014;58:2871-7.
- 632 [553](#) Poirel L, Bonnin RA, Nordmann P. Genetic features of the widespread plasmid coding for the carbapenemase  
633 OXA-48. *Antimicrob Agents Chemother*. 2012;56:559-62.
- 634 [564](#) Potron A, Poirel L, Nordmann P. Derepressed transfer properties leading to the efficient spread of the plasmid  
635 encoding carbapenemase OXA-48. *Antimicrob Agents Chemother*. 2014;58:467-71.
- 636 [57](#) [Rang FJ, Kloosterman WP, de Ridder J. From squiggle to basepair: computational approaches for improving](#)  
637 [nanopore sequencing read accuracy. \*Genome Biol\*. 2018;19:90.](#)
- 638 [58](#) [Tamma PD, Fan Y, Bergman Y, et al. Applying rapid whole-genome sequencing to predict phenotypic](#)  
639 [antimicrobial susceptibility testing results among carbapenem-resistant \*Klebsiella pneumoniae\* clinical](#)  
640 [isolates. \*Antimicrob Agents Chemother\*. 2018;63: pii: e01923-18.](#)
- 641 [595](#) Cheruvanky A, Stoesser N, Sheppard AE, et al. Enhanced *Klebsiella pneumoniae* Carbapenemase Expression  
642 from a Novel Tn4401 Deletion. *Antimicrob Agents Chemother*. 2017;61:e00025-17.

Formatted: Font: Italic

Formatted: Font: Italic

Formatted: Font: Italic

Formatted: Font: Italic

643 ~~6056~~ Klontz EH, Tomich AD, Gunther S, et al. Structure and Dynamics of FosA-Mediated Fosfomycin Resistance  
644 in *Klebsiella pneumoniae* and *Escherichia coli*. *Antimicrob Agents Chemother*. 2017;61:e01572-17.

645 ~~6157~~ Saenger W, Orth P, Kisker C, et al. The Tetracycline Repressor-A Paradigm for a Biological Switch. *Angew  
646 Chem Int Ed Engl*. 2000;39:2042-52.

647 ~~6258~~ Cheng YH, Lin TL, Pan YJ, et al. Colistin resistance mechanisms in *Klebsiella pneumoniae* strains from  
648 Taiwan. *Antimicrob Agents Chemother*. 2015;59:2909-13.

649 ~~6359~~ Haeili M, Javani A, Moradi J, et al. MgrB Alterations Mediate Colistin Resistance in *Klebsiella pneumoniae*  
650 Isolates from Iran. *Front Microbiol*. 2017;8:2470.

651 ~~640~~ Baron S, Hadjadj L, Rolain JM, et al. Molecular mechanisms of polymyxin resistance: knowns and  
652 unknowns. *Int J Antimicrob Agents*. 2017;48:583-91.

653

Formatted: Not Highlight

Formatted: Normal, Left, Indent: Left: 0", First line: 0",  
Line spacing: single

654

655 **Table and Figure Legends**

656

657

| Isolate  | ST  | Contig | Length (bp)    | Coverage | Contig ID*                                           | Resistance Genes**                                                                                                                                |
|----------|-----|--------|----------------|----------|------------------------------------------------------|---------------------------------------------------------------------------------------------------------------------------------------------------|
| 1_GR_13  | 147 | 1      | <b>5181675</b> | 1        | C                                                    | <i>blaSHV-11, fosA, oqxA, oqxB</i>                                                                                                                |
|          |     | 2      | <b>192771</b>  | 1.95     | P: IncA/C2                                           | <i>aadA1, ant(2'')-Ia, aph(6)-Id, ARR-2, blaOXA-10, blaTEM-1B, blaVEB-1, cmlA1, dfrA14, dfrA23, rmtB, strA, sul1, sul2, tet(A), tet(G)</i>        |
|          |     | 3      | <b>168873</b>  | 2        | P: IncFIB <sub>pKpn3</sub> , IncFII <sub>pKP91</sub> | <i>aadA24, aph(3')-Ia, aph(6)-Id, dfrA1, dfrA14, strA</i>                                                                                         |
|          |     | 4      | <b>108879</b>  | 1.53     | P: IncFIB <sub>pKPHS1</sub>                          | -                                                                                                                                                 |
|          |     | 5      | <b>55018</b>   | 14.10    | -                                                    | -                                                                                                                                                 |
|          |     | 6      | <b>53495</b>   | 2.36     | P: IncR, IncN                                        | <i>aadA24, aph(3')-Ia, aph(6)-Id, blaVIM-27, dfrA1, mph(A), strA, sul1</i>                                                                        |
| 2_GR_12  | 258 | 1      | <b>5466424</b> | 1        | C                                                    | <i>blaSHV-11, fosA, oqxA, oqxB</i>                                                                                                                |
|          |     | 2      | 197872         | 1.3      | P: IncFIB <sub>pKpn3</sub> , IncFIIK                 | <i>aadA2, aph(3')-Ia, catA1, dfrA12, mph(A), sul1</i>                                                                                             |
|          |     | 3      | 175636         | 1.49     | P: IncA/C2                                           | <i>aadA1, ant(2'')-Ia, aph(3'')-Ib, aph(6)-Id, ARR-2, blaOXA-10, blaTEM-1A, blaVEB-1, cmlA1, dfrA14, dfrA23, rmtB, sul1, sul2, tet(A), tet(G)</i> |
|          |     | 4      | 95481          | 1.61     | P: IncFIB <sub>pQil</sub>                            | <i>blaKPC-2, blaOXA-9, blaTEM-1A</i>                                                                                                              |
|          |     | 5      | <b>43380</b>   | 1.91     | P: IncX3                                             | <i>blaSHV-12</i>                                                                                                                                  |
|          |     | 6      | <b>13841</b>   | 4        | P: ColRNAI                                           | <i>aac(6')-Ib, aac(6')Ib-cr</i>                                                                                                                   |
| 16_GR_13 | 11  | 1      | <b>5426917</b> | 1        | C                                                    | <i>blaSHV-11, fosA, oqxA, oqxB</i>                                                                                                                |
|          |     | 2      | <b>187670</b>  | 0.88     | P: IncFIB <sub>pKpn3</sub> ; IncFIIK                 | <i>aac(3)-IIa, aac(6')Ib-cr, aadA2, aph(3')-Ia, blaCTX-M-15, blaOXA-1, catB4, dfrA12, mph(A), sul1</i>                                            |
|          |     | 3      | <b>155161</b>  | 0.99     | P: IncA/ C2                                          | <i>aadA1, ant(2'')-Ia, aph(3'')-Ib, aph(6)-Id, ARR-2, blaOXA-10, blaTEM-1B, blaVEB-1, cmlA1, rmtB, sul1, sul2, tet(A), tet(G)</i>                 |
|          |     | 4      | <b>63589</b>   | 1.49     | P: IncL/ M <sub>pOXA-48</sub>                        | <i>blaOXA-48</i>                                                                                                                                  |
|          |     | 5      | <b>5234</b>    | 188.49   | -                                                    | -                                                                                                                                                 |
|          |     | 6      | <b>4940</b>    | 97.77    | P: ColRNAI                                           | -                                                                                                                                                 |
| 20_GR_12 | 258 | 1      | <b>5395894</b> | 1        | C                                                    | <i>blaSHV-11, fosA, oqxA, oqxB</i>                                                                                                                |
|          |     | 2      | <b>170467</b>  | 1.77     | P: IncFIB <sub>pKpn3</sub> ; IncFIIK                 | <i>aph(3')-Ia, blaKPC-2, blaOXA-9, blaTEM-1A</i>                                                                                                  |
|          |     | 3      | <b>50979</b>   | 1.42     | P: IncN                                              | <i>aph(3'')-Ib, aph(6)-Id, blaTEM-1A, dfrA14, sul2, tet(A)</i>                                                                                    |
|          |     | 4      | <b>43380</b>   | 1.78     | P: IncX3                                             | <i>blaSHV-12</i>                                                                                                                                  |
|          |     | 5      | <b>13841</b>   | 10.82    | P: ColRNAI                                           | <i>aac(6')-Ib, aac(6')Ib-cr</i>                                                                                                                   |

658

659 **Table 1:** Final assembly of XDR *K pneumoniae* isolates and location of antibiotic resistance genes

660 \*Contig ID represents chromosome (C) or plasmid (P): replicon determined via PlasmidFinder 1.3.

Formatted: Normal, Left, Line spacing: single

Formatted Table

661 \*\*Resistance genes identified using ResFinder 3.0 ( $\geq 90\%$  sequence similarity,  $\geq 60\%$  minimum length) and displayed  
662 in alphabetical order. **Bold** indicates a circular contig.

663  
664 **Figure 1:** Time required to detect antibiotic resistance genes via the real-time emulation analysis using MinION DNA  
665 and direct RNA sequencing. (A) 1\_GR\_13, (B) 2\_GR\_12, (C) 16\_GR\_13 and (D) 20\_GR\_12. Legend colours identify  
666 the class of antibiotic to which the gene confers resistance, / on y-axis indicates reads detected more than one resistance  
667 gene and # is a family of genes detected ( $>3$ ). An asterisk (\*) indicates the inability for direct RNA sequencing to  
668 detect this gene. Albacore 2.2.7. base-called sequences were used and all reads (pass and fail) were included in this  
669 analysis.

670 **Figure 2:** ~~Direct RNA sequencing~~ Relative expression of resistance genes ~~aligned to completed genomes expressed~~  
671 ~~as counts per million mapped reads~~ (post removal of reads mapping to rRNA) ~~normalised to housekeeping gene,~~  
672 ~~rpsL, via direct RNA sequencing. Strains investigated include:~~ (A) 1\_GR\_13, (B) 2\_GR\_12, (C) 16\_GR\_13 and (D)  
673 20\_GR\_12. X-axis depicts the resistance genes and are grouped based on the location in the genome where P indicates  
674 a plasmid followed by replicon identity. Albacore 2.2.7 base-called pass and fail reads were used for analysis.  
675 ~~Quantitated as counts per million mapped reads (cpm) (post removal of reads mapping to rRNA) and~~ Dotted line is  
676 ~~set to 300 cpm.~~

677 **Figure 3:** Correlation between resistance genes detected via direct RNA sequencing and validated using qRT-PCR.  
678 Relative expression was calculated via normalizing to the housekeeping gene, *rpsL* for both direct RNA sequencing  
679 ( $\log_2(\text{gene}/rpsL)$ ) and qRT-PCR ( $2^{-\Delta\Delta CT}$ ). Due to high similarity between certain genes, several primers recognise more  
680 than one gene. These include *aac(6')Ib*: *aac(6')Ib-cr*, *aadA24*; *strA*: *aph(3'')-Ib* and *blaTEM-1*: *blaTEM-1A*, *blaTEM-*  
681 *1B*.

682 **Figure 4:** Correlation between the four XDR *K pneumoniae* isolates for gene expression via direct RNA sequencing.  
683 Top panels display spearman correlation coefficients. The diagonal panel shows the density of gene expression levels  
684 in counts per million mapped reads (~~cpm~~) for each sample (post removal of rRNA mapped reads). Bottom panels  
685 depict the correlation of gene expression between isolates as a scatter plot. Colours indicate categorization of gene:  
686 antimicrobial resistance genes (AMR) as per ResFinder 3.0, virulence genes (VIR) determined via RAST and all other  
687 genes or background genes (BG) are displayed. Cpm was capped at 2000.

688 **Figure 5:** Expression of genes associated with the polymyxin resistance pathway. Comparison between (A) direct  
689 RNA sequencing (solid shapes without asterisks) and (B) qRT-PCR (solid shapes with asterisks). Direct RNA  
690 sequencing data is calculated as  $\log_2(\text{gene}/\text{ppsL})$  and qRT-PCR as  $\text{gene}/\text{ppsL}$ . All isolates except 20 GR\_12  
691 harboured resistance to polymyxin. Isolates harbouring resistance to polymyxins (MIC: >2 µg/mL) include 1\_GR\_13,  
692 2\_GR\_12 and 16\_GR\_13. The bars indicate the average of qRT-PCR and direct RNA sequencing. An asterisks (\*)  
693 indicates the qRT-PCR data point and bars represent mean.

Formatted: Font: Italic

Formatted: Font: Italic

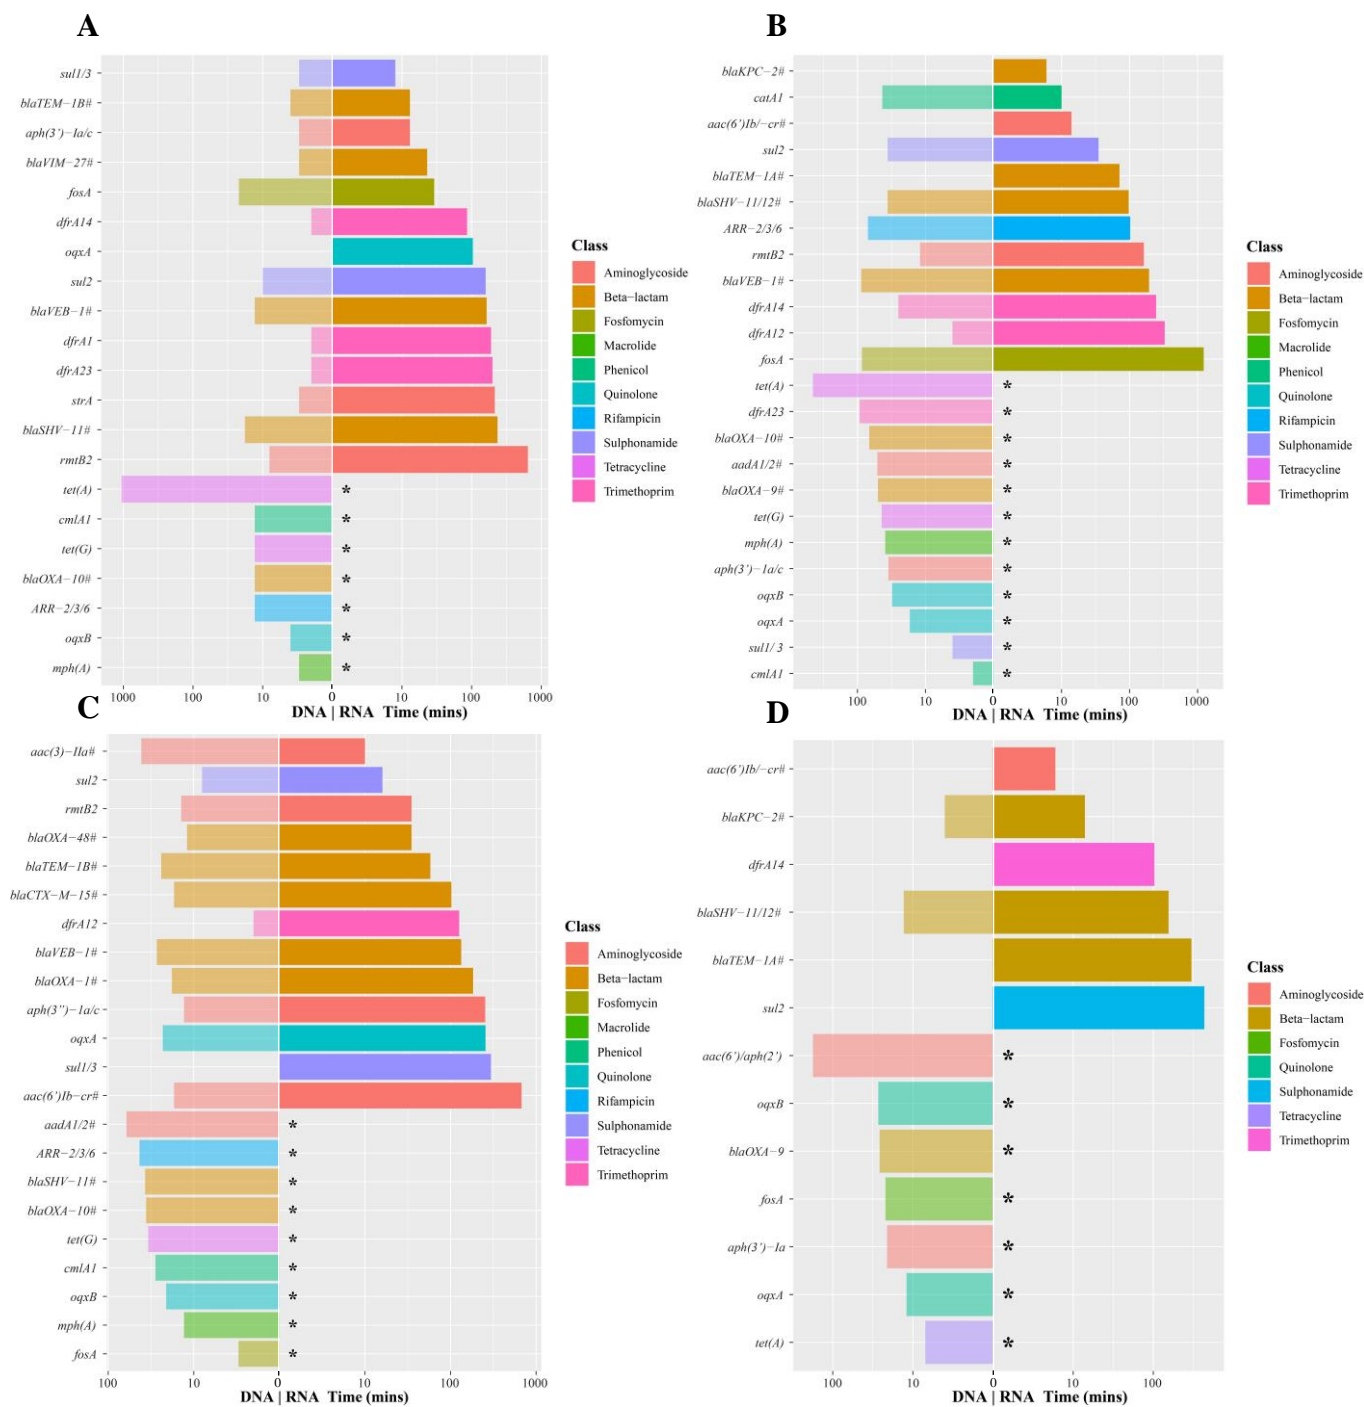

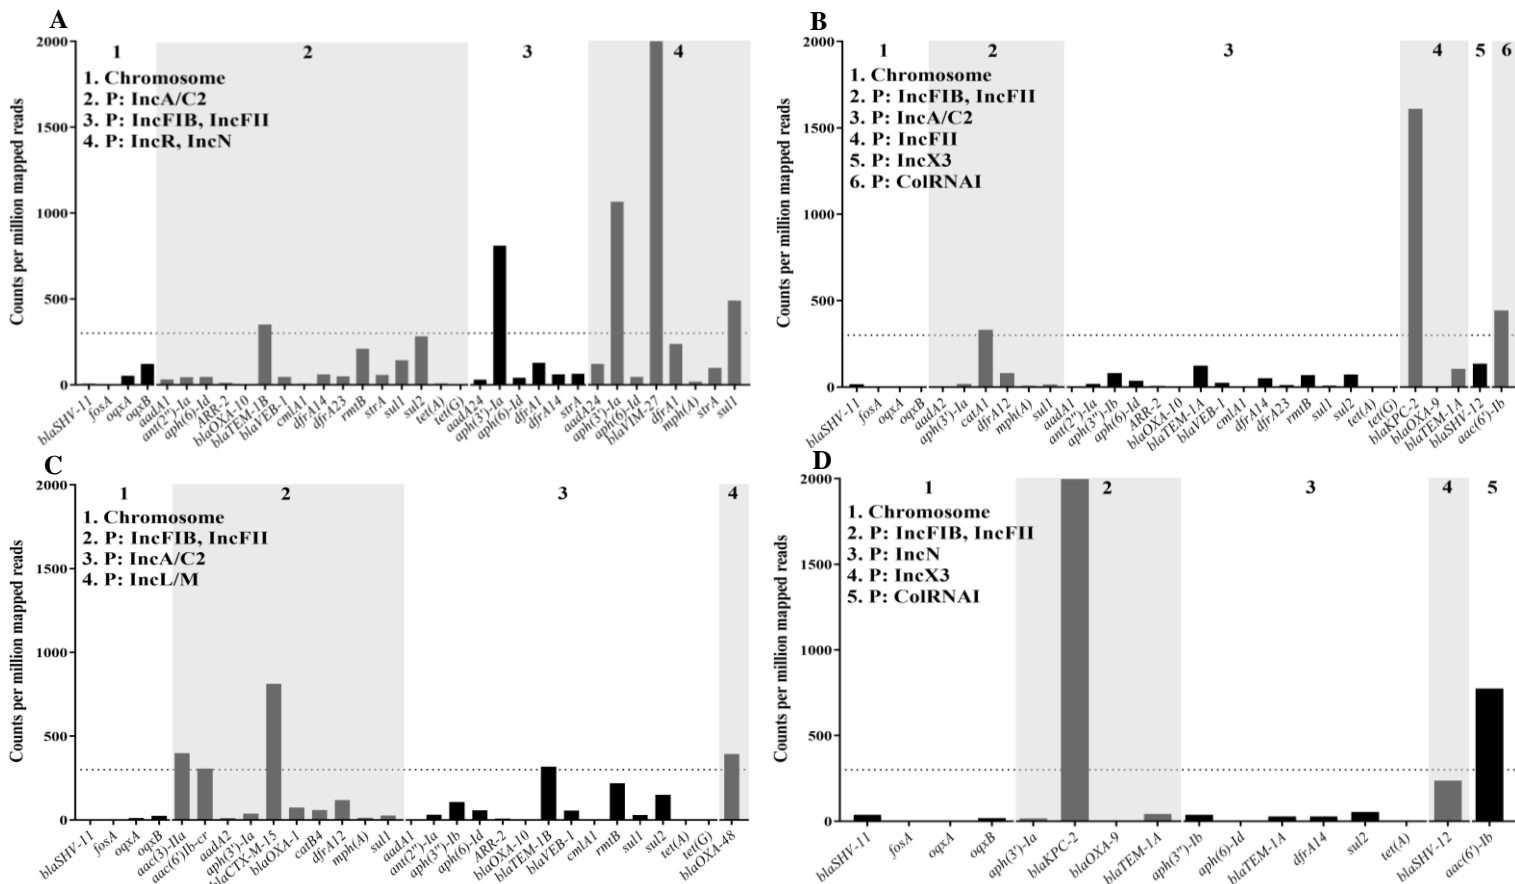



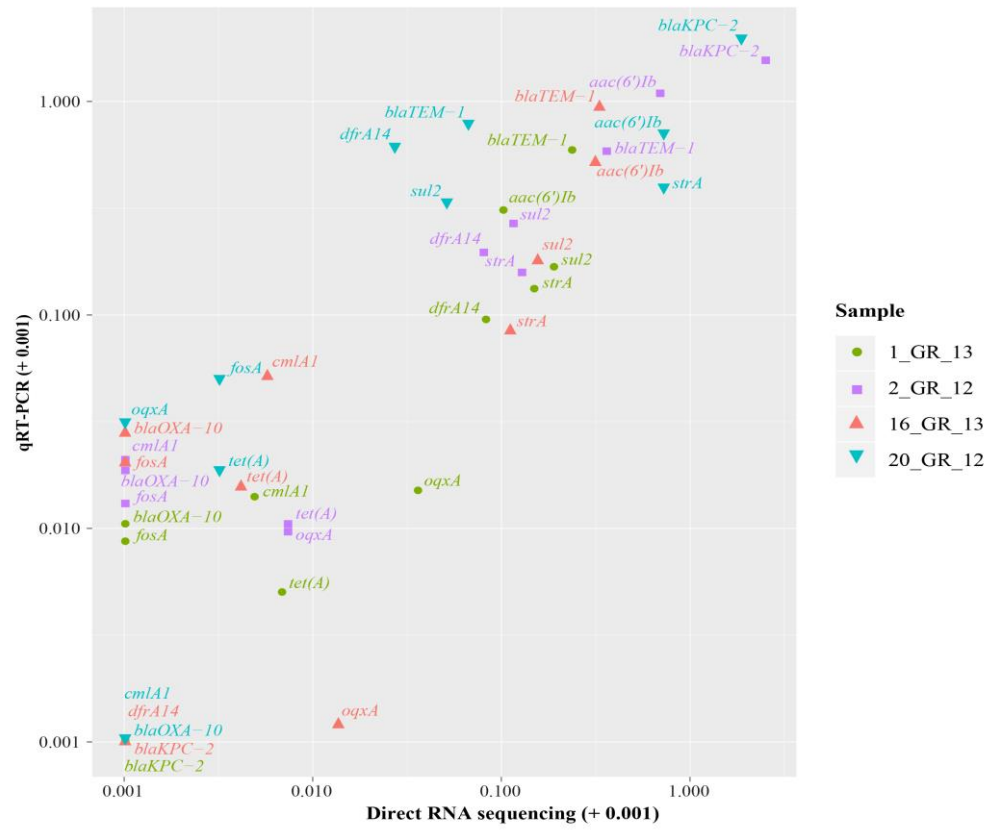

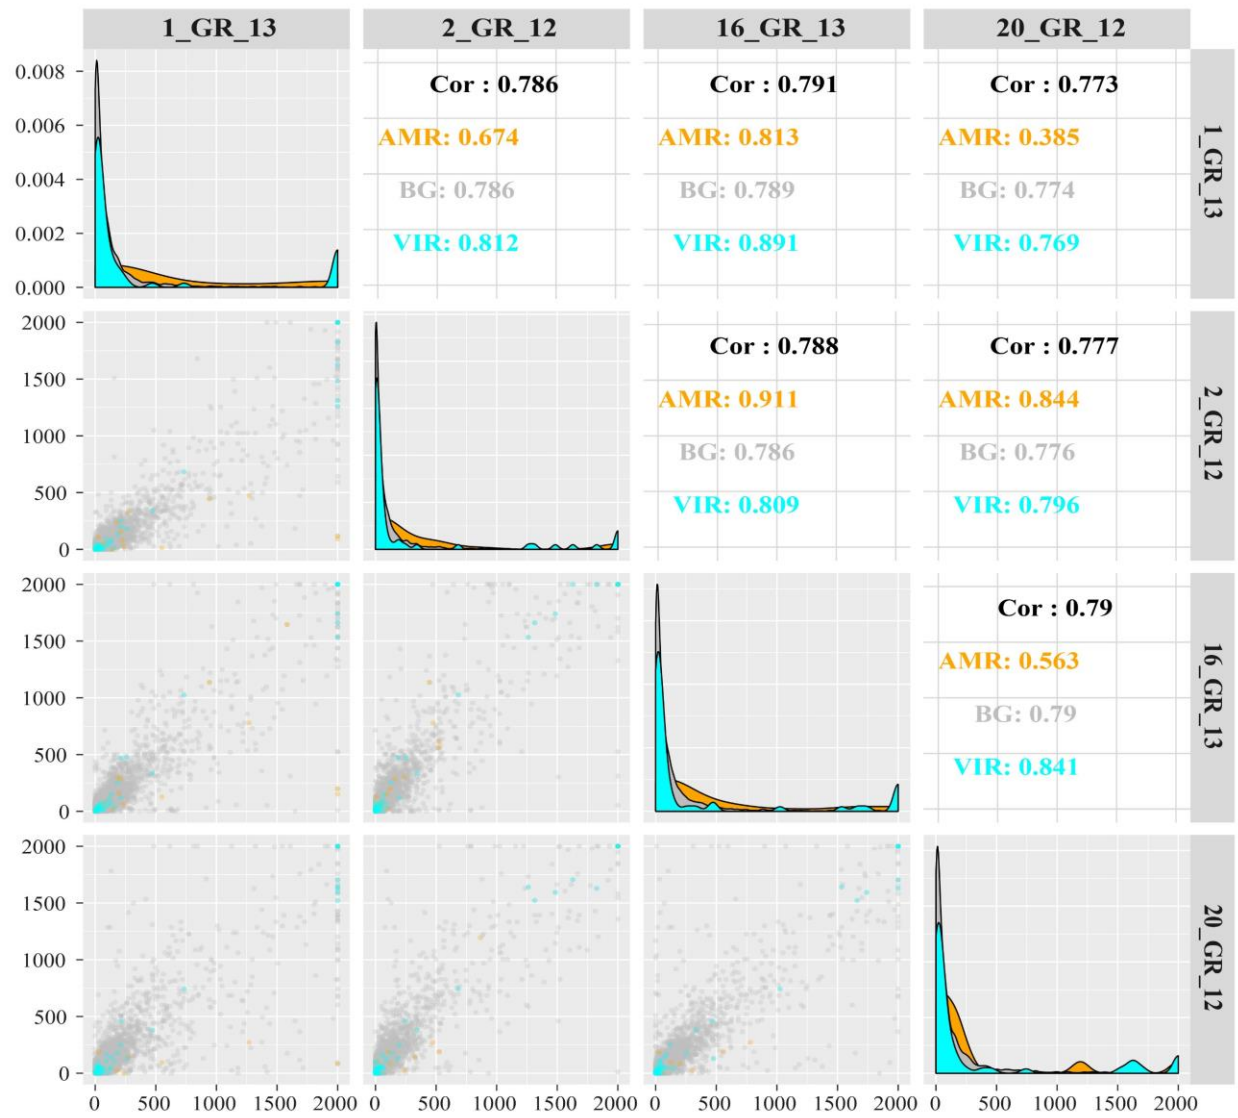

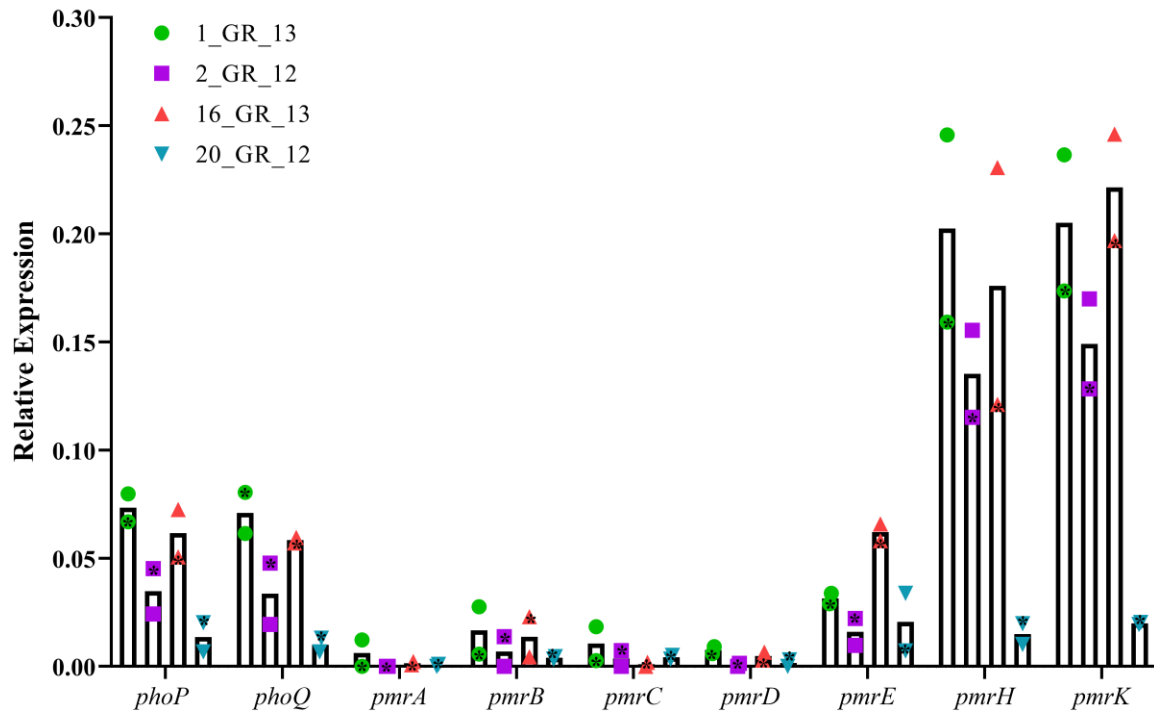

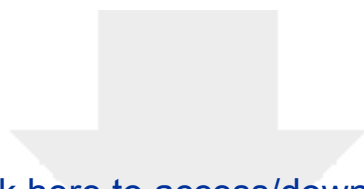

Click here to access/download

**Supplementary Material**

**#SI\_GS\_Evaluating\_XDRKP#\_FINAL.docx**

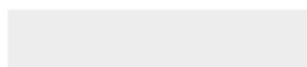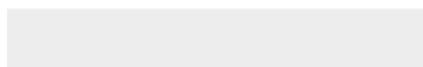

## “Evaluating the Genome and Resistome of Extensively Drug-Resistant *Klebsiella pneumoniae* using Native DNA and RNA Nanopore Sequencing”

GIGA-D-19-00200

Response to Reviewers

Dear Dr. Scott Edmunds,

We thank the reviewers for the opportunity to revise this manuscript (GIGA-D-19-00200). Their comments have helped us significantly strengthen the work. We have now provided additional information including rationale for using direct RNA sequencing and particular analysis methodologies. Figures have also been modified to aid with the interpretation of data. To highlight the adjustments completed, we have also uploaded a mark-up version of the manuscript. Please find below a point-by-point response to the reviewers' comments.

### Reviewer reports:

#### Reviewer #1:

In the manuscript "Evaluating the Genome and Resistome of Extensively Drug-Resistant *Klebsiella pneumoniae* using Native DNA and RNA Nanopore Sequencing" by Pitt et al., the authors describe datasets generated from multiple sequencing modalities of antibiotic-resistant clinical isolates, and discuss the potential of this technology for rapid detection of AMR. Although these methods and sequencing characterization and analysis are of importance to the field, there are several issues which remain to be addressed.

#### Specific points:

It would be useful to better establish the rationale for why direct detection of RNA transcripts matters, and what additional information direct RNA sequencing gets you that rapid cDNA conversion and sequencing can't. Perhaps the largest issue is - "Why rRNA-seq?" There doesn't seem to be an obvious benefit, given the poor time to detection compared to just DNA sequencing. Expression levels are useful, but could be determined from Illumina sequencing. Without splicing there are no isoforms to contend with, and the error rate adds difficulty in interpretation and determination of primary protein sequence. Additionally, most clinical bacterial characterization work doesn't use RNA-seq, and addressing the problems clearly (i.e. rRNA depletion, RNA instability) should be done at the outset.

Response: We have now provided additional information to highlight the benefits of using direct RNA sequencing in the introduction and discussion. The time to detect antibiotic resistance using direct RNA sequencing was slower compared to DNA, however, this is only the first generation of the technology. The latest kit, SQK-RNA002, has shown advancements in data generation which unfortunately was not available during the time of this study. “Our findings show that the slower time-to-detection of resistance genes in direct RNA sequencing was due to both the level of expression as well as the slower translocation speed, and hence using cDNA would only partially overcome this limitation.” (Discussion: Line 396, also refer to Supplementary Figure S4). “Furthermore, library preparation time is halved for direct RNA sequencing due to the absence of cDNA synthesis” (Introduction: Line 57). Indeed, expression levels can be determined via Illumina sequencing, however, in the context of a diagnostic tool, Illumina platforms require the completion of the sequencing run (~48 hours) to output data and analysis to be performed.

Nanopore technologies can output data as soon as it is generated to enable real-time analysis. Although bacteria lack splicing, long read sequencing has the potential to detect operon sites where several transcripts are co-expressed (refer to Line 59 and 417). Due to difficulties extracting RNA from these strains and downstream processing for sequencing, these transcripts were short and not enough data was generated to confidently detect operon sites (Supplementary Figure S3). Furthermore, native RNA sequencing has the potential to detect RNA modifications associated with antibiotic resistance which are removed when converted to cDNA and is unique to this technology (Introduction: Line 55). Although RNA is unstable and requires several additional processing steps compared to DNA, advancements on this part could be made in the future and hence, the potential for this to be used to detect antibiotic resistance was explored. We have now made note of the limitations associated with RNA sequencing in the clinic (Discussion: Line 368). Additionally, RNA has the potential to determine the functionality of a resistance genes as the presence of these genes does not necessarily mean they confer resistance (Discussion: Line 369).

Under the "DNA extractions and HMW DNA isolation methods section", this section should be rewritten for clarity - it was confusing to determine which isolations worked and which didn't, and why. It's still important to include details of why protocol modifications were made, but if these could be incorporated into methods better that would aid in understanding.

Response: This section has now been rewritten ("High molecular weight DNA isolation", page 4). Several modifications were implemented primarily due to difficulties lysing these highly antibiotic-resistant *K. pneumoniae* strains potentially due to a thickened capsule wall. This resulted in capsule contamination (carbohydrate) as determined via Nanodrop (Line 96). This was very cumbersome for isolate 2\_GR\_12 which was noted to have an increased carbohydrate contamination potentially due to the capsule and required a further purification step (Line 97).

Under "real-time resistome detection emulation" as well as "assembly of genomes" sections, it would be helpful to include a rationale on why certain software tools were chosen over others, given you tried many options. For example, why was BWA-MEM chosen over minimap2?

Response: In light of the vast amount of software tools available, we selected the four most commonly used tools for bacterial assembly. These incorporated both hybrid assemblers (Unicycler, npScarf) and the remaining two using only Nanopore reads (Canu, Minimap2/ Miniasm/ Racon). We trialed analysis using minimap2 initially, however, a lower alignment rate was observed potentially due to the majority of reads being less than 1000 bp (Supplementary Figure S3). This has now been mentioned in the supplementary section: Supplementary Table S6 and noted in the main text (Line 148) which also notes adjusted parameters used for BWA-MEM when using ONT reads.

How were you able to distinguish multiple copies of resistance genes from duplicated misassemblies?

Response: Both the fragment distribution (Supplementary Figure S1) and the read-length distribution (Supplementary Figure S3 A-D) indicate substantial number of reads of length greater than 10kb. The vast majority of bacterial repeats are shorter than 10kb, meaning that we are able to correctly place these repeats in the assembly. Furthermore, these long reads were able to span the duplicated resistance gene regions and correctly assemble these plasmids.

Would it actually be faster to detect with cDNA sequencing, given faster motor protein translocation rate and likely higher copy number of transcripts of interest? It would be useful to include thoughts on this in the discussion.

Response: While the sequencing speed of cDNA is currently faster than direct RNA (450 bases/second vs 70 bases per second) the library preparation for direct RNA is much quicker (105 minutes vs 270 minutes). Moreover, it is anticipated that future direct RNA sequencing kits will run at the same translocation speed as cDNA. We considered the translocation speed impeding on the detection method, hence, why we included an analysis total yield required to detect resistance genes as well as time to call the resistance genes (Line 266, Supplementary Figure S4). We have now added an additional sentence in the discussion: “Our findings show that the slower time-to-detection of resistance genes in direct RNA sequencing was due to both the level of expression as well as the slower translocation speed, and hence using cDNA would only partially overcome this limitation.” (Line 396).

You say "Nanopore DNA sequencing currently has an accuracy ranging from 80 to 90%, which limits its ability to detect genomic variations", but there are post-processing tools available to increase accuracy and ability to detect SNVs - this should be included in the discussion.

Response: Agreed, there are tools to improve the accuracy which we have now made note of in the discussion: “However, software tools such as Nanopolish (<https://github.com/jts/nanopolish>) and Tombo (<https://github.com/nanoporetech/tombo>) (similarly used to re-train Chiron v0.5 for direct RNA sequencing data) have the potential to correct these reads and would be helpful to integrate to increase the accuracy of detecting resistance genes.” (Line 359).

Further the detection of SNV mutations and indels is critical with respect to the detection of chromosomal mutations in these samples. Additional consideration of methylation signatures is crucial, as they can cause systematic error (PMID: 30373801) if not corrected.

Response: We have now noted the influence of DNA modifications on the accuracy of Nanopore sequencing and included this publication. “We utilised native DNA sequencing in this study which retains epigenetic modifications such methylation which can hinder the accuracy of reads and subsequent calling of antibiotic resistance [58].” (Line 362).

"All isolates exhibited low levels of expression for fosfomycin, macrolide and tetracycline resistance, despite exhibiting phenotypic resistance to fosfomycin and tetracycline", but are high levels of expression essential for phenotypic resistance? Are these low levels surprising? It would be helpful to link to papers discussing this.

Response: Additional information has now been included to identify why low expression of particular genes was observed. Limited literature is available on these specific genes in *K. pneumoniae* with transcriptional and antimicrobial susceptibility testing. We have included the following sentence regarding fosfomycin resistance facilitated via the *fosA* gene: “Notably, Klontz *et al* identified that chromosomally integrated FosA, similarly observed in our study, from *K. pneumoniae* harboured a higher catalytic efficiency. A higher catalytic efficiency may reason why our strains only require a low abundance of expression and still retain fosfomycin resistance” (Line 382). Low levels of expression for tetracycline are not surprising as this resistance is well characterized and found to be inducible (antibiotic exposure is required for expression of genes). This has been reworded: “Genes *tet(A)* and *tet(G)* encode efflux pumps which, in the absence of tetracycline, are lowly expressed and the lack of antibiotic supplementation in this study confirms this

observation [61]. Detecting inducible resistance (antibiotic exposure required for gene expression) such as tetracycline resistance highlights one of the advantages of investigating the transcriptome.” (Line 384)

Figure 5 - instead of switching back and forth between panels A and B, a scatterplot comparing the two directly like Fig 3 would be more useful.

Response: This figure has now been amended with the data on a single graph.

Why do you think only 23% RNA reads aligned? Did you try to identify the unaligned reads (like sort out contamination, noise)? It would be beneficial to include at least a blast/centrifuge style analysis trying to determine the source of the unaligned reads. Additionally, a k-mer analysis of the unaligned reads could help determine their origin.

Response: We identified that various failed reads were <10 bp (Supplementary Figure S3) which were filtered before alignment with BWA-MEM (k -11, seed length of 11 bp). Preliminary BLASTn analysis of unmapped reads identified a bacterial origin. The primary issue with the direct RNA sequencing data is the base-calling. When adapting Chiron v0.5 for this data, squiggle plots (raw nanopore data) identified insufficient trimming of the artificial poly(A). Furthermore, RNA modifications in bacteria remain largely unknown and this has the potential to interfere with the raw nanopore current change and subsequent base-calling. This has now been included in the discussion: “Limitations were observed when base-calling bacterial direct RNA sequencing and may be attributed to trimming the long artificial poly(A) tail and interference of RNA modifications.” (Line 391).

How much of the poor alignment is due to the method of preparation (i.e. polyA tailing, etc.)? Did the authors perform optimization of the extraction and library prep for bacterial RNA? What about using an alternative tail and RNA adaptor?

Response: We trialed phenol/ chloroform RNA extractions however, this process was lengthy and resulted in a low yield of RNA and increased impurities. The PureLink RNA Mini Kit protocol is relatively quick (<30 mins/ sample). We attempted an on-column DNase treatment during this protocol but the best DNA depletion was observed using TURBO DNase which doesn't work on column (requires 37°C incubation). Our optimized RNA extraction resulted in Bioanalyzer RNA integrity scores of  $\geq 8.5$  which has now been included in Line 116 (RIN scale 0-10, 10 is no degradation using 16S and 23S pecks as reference). We considered altering the library preparation including using an adapter similar to Smith *et al* (reference 26) which recognizes the Shine-Dalgarno sequence, however, there are deviations in this sequence and multi antisense adapters would be required so all transcripts are sequenced. Hence, the poly(A) tailing kit was more feasible as it will tag all 3'transcripts which allows for only the native RNA strand to be sequenced. Unfortunately, we were unaware of the efficiency of the polymerase until post sequencing analysis was performed (Supplementary Figure S6), hence, a shorter incubation can be implemented for future studies.

Viral direct RNA seq has been done (PMID: 30765700 and 30258076 for example) - it would be good to cite these or related papers.

Response: The updated publication of PMID: 30765700 rather than the preprint has been included in the references and PMID: 30258076 was originally incorporated in the introduction as reference 24 (refer to Line 54 for references referring to viral direct RNA sequencing). To our knowledge, all the publications on direct RNA sequencing are in the references.



Some minor points:

"This research also established a methodology and analysis for bacterial direct RNA sequencing." is repeated in the conclusions.

Response: This duplicated sentence has now been removed from the conclusions section.

Figure 2 colorblocking is a little confusing - could be more straightforward to break up the figure into separate panels per strain contig, for example with a ggplot facet\_grid.

Response: Figure 2 has now been modified so genes belonging to particular contigs are easier to identify. This included adjusting the transparency of the colorblocking and splitting the x-axis similar to the ggplot facet\_grid format.

### **Reviewer #2:**

This manuscript presents a rapid resistance-gene discovery experiment, using genome sequencing and assembly to identify potentially-active genes, combined with differential expression to determine drug-free resistome activity. This manuscript is differentiated from most other direct-RNA and cDNA nanopore research, in that it is the \*expression\* rather than the \*structure\* of the genes is evaluated here. Bearing in mind that I cannot comment much on the biology side of things, I consider this manuscript to be a reasonable presentation of the experimental work that has been described, and recommend that it be accepted pending minor changes to figures, and clarification of multi-mapping results. I would like to thank the authors for making their Nanopore sequence data public prior to review submission; it demonstrates a good open research ethic.

My specific comments regarding the manuscript follow:

\*\* Text \*\*

L133: This references a fairly old version of Canu (i.e. v1.5), which seems a bit strange given that Guppy v3.0.3 is also mentioned (L260). I note that Canu v1.8 was released before Guppy v3.0.3, and would be interested to know why this version of Canu was chosen.

Response: Genome assemblies were conducted initially in this study and the transcriptomics at a later date. As we were able to complete the assemblies adequately using the hybrid assembler Unicycler and utilize Illumina reads to correct ONT sequencing errors, we did not run analysis on the most recent version of Canu. Furthermore, Guppy was integrated later as we had multiple issues with the base-calling of direct RNA sequencing and we hoped this update in the software would ameliorate this problem.

L144: I don't have an encyclopaedic knowledge of bwa-mem command-line options. It would be helpful to explain what the options mean. I'm particularly interested in why the default options were not appropriate, and what (if any) compensations were made for multi-mapped reads.

Response: This section has now been updated: "Similar parameters to the BWA-MEM ont2d function were used but seed length was reduced (-k 14) to compensate for shorter reads: -k 11 [minimum seed length, bp] -W20 [bandwidth] -r10 [gap extension penalty] -A1 [match score] -B1 [mismatch penalty] -O1 [Gap open penalty] -E1 [Gap extension penalty] -L0 [Clipping penalty]). Multi-mapping reads were removed via SAMtools (secondary alignment: flagged as 256)..." (Line 149).

L144: Why was minimap2 not used here? It was written by the same author as bwa-mem, but is specifically written to incorporate corrections to improve mapping for noisy Nanopore Direct RNA-seq [e.g. see <https://github.com/lh3/minimap2#getting-started>]

Response: Preliminary analysis using minimap2 showed fewer reads aligning to the reference (now noted in the legend of Supplementary Table S6). It has been noted by Li H (doi: 10.1093/bioinformatics/bty191) that BWA-MEM is more suited to short read data and has a slightly improved accuracy compared to minimap2. We've further noted the bias towards BWA-MEM in Line 148: "BWA-MEM was selected due to shorter transcripts being produced by bacteria (Supplementary Figure S3) and the lack of introns and alternative splicing."

L145: I notice from L198 that there are gene copies in the data, with potentially high identity. Is there a particular reason why reads were mapped to the genome, rather than to transcriptome that merges essentially-identical genes?

Response: As described in the "Real-time resistome detection emulation" section (line 127), the resistance gene detection was carried out by mapping to a database of resistance genes which was clustered based on 90% identity threshold. However, in the section "RNA alignment and expression profiling" (Line 146) we mapped reads to the genome. In this case, if a read mapped to multiple locations equally well, then BWA-MEM randomly allocates to one position (primary alignment). Several instances of multiple copy numbers of resistance genes (Line 215) occurred which will influence the quantification of expression when aligned to the genome. Interestingly, there were some slight deviations in the expression of perfectly duplicated genes with unique flanking regions (refer to *strA* and *sulI* in Figure 2A, contig 2 and 4) which may indicate that these genes are controlled by an operon (co-transcribed genes). This is an advantage of aligning to the genome. We also took this into consideration when graphing Figure 3 and combined all reads mapping to duplicated genes, such as *strA*, before normalizing to a housekeeping gene (*rpsL*).

L153: Why was a more well-known differential expression package not used here (e.g. DESeq2 or EdgeR) for evaluating differential expression? Is there an advantage of VGAM for plasmid or small genome differential expression?

Response: The beta-binomial distribution (implemented in VGAM) was used as a statistic to identify genes with significantly fewer or greater reads mapping in one sample versus another. It was chosen because it represents the uncertainty in the proportion estimated from count data. However, we agree that EdgeR and DESeq2 are also able to adequately estimate this uncertainty and hence we have redone the analysis using EdgeR (Supplementary Figure S7, Methods: "Whole transcriptome gene expression and estimation of expression confidence intervals", Line 157). The list of differentially expressed genes is very similar to that identified using VGAM (at least 90% identical).

L198 (see also L145): How identical were these genes? Would this identity affect genome mapping? In situations with multiple copies of near-identical genes, do you have any evidence to suggest that only one copy was active?

Response: These genes are 100% similar and will impact mapping to the genome. Unless expressed by an operon and the full-length sequences are retrieved, only then could this distinguish which genes are active. This issue will still arise if transcripts are mapped to the transcriptome. The only definitive way to determine this would be to perform knock-down studies of these regions and subsequently evaluate expression.

L218: What was the MAPQ probability for these genes? If the MAPQ probability is less than 3, it means that a gene could be equally-well placed at least two different sites ( $-\log_{10}(0.5) * 10 \approx 3$ ), which is expected given the gene duplication in your assemblies. I don't think this would indicate that the mapping is bad, as such, although there may be other reasons for a poor mapping.

Response: Agreed, the MAPQ score was commonly  $\leq 10$  for these duplicated reads. We have made a note of low mapping quality due to multiple copies of genes: "Low mapping quality could be attributed to assignment of reads to multiple copies of genes in the genome. Furthermore, the ONT error rates could lead to misassignment of reads to genes." (Line 275).

L228 (see also L198): more information about the similarity between the "correct" and "incorrect" gene would be useful; I notice that L335 mentions an identity for some genes of "greater than or equal to 80%". Do you have other evidence that systematic sequencing error would lead to reads being assigned to the incorrect gene?

Response: Various resistance genes harbor  $\geq 80\%$  similarity when taking into consideration genes deposited on the ResFinder database. In several instances, this is only 1 nucleotide and if sequencing errors arise, have the potential for misidentification. We can determine this accumulation of sequencing errors via observing the real-time emulation for DNA sequencing in Supplementary S5. After 5 hours (300 minutes), we could witness multiple genes being detected that were not identified in the final assembly and the Illumina only SPAdes assembly.

L245 (see also L218): Were there multiple *fosA* transcripts in the genome? I can't see from Table 1 any indication of this, but maybe it's not clear enough for me. If not, can you suggest other reasons for the low MAPQ score? It seems like a lot of results are being thrown away because the MAPQ is low.

Response: Only one copy of *fosA* is encoded on the chromosome for all isolates (Line 194). All genes with multiple copies have been noted in Line 215. The mapping quality is most likely due to the low expression of this gene and difficulties with base-calling (issues removing the long artificial poly(A) tail and interference of RNA modifications (Line 393). Once base-calling tools have been optimized for bacterial direct RNA sequencing, MAPQ scores will be a better quality.

L336 (see also L228 and L198): Would 80% identity lead to a misclassification by BWA-MEM?

Response: Yes, as some genes are very similar (potentially only one nucleotide difference), this has the potential to result in misclassification of resistance genes in the real-time emulation. Especially when we identified a 10% error rate in our ONT DNA sequencing (Line 356) and  $\leq 23\%$  for direct RNA sequencing (Line 394).

L341: I get a bit frustrated by people discussing accuracy from previous (typically quite old) nanopore papers as if it were a fixed thing, especially in a study that has produced a lot of other nanopore data. Nanopore technology changes quickly, and basecalling accuracy has made substantial improvements in particular over the last year. I'm not convinced a paper published in January 2018 would give a good estimate for accuracy called with guppy 3.0.3 (or 3.1.5, which is the latest that I'm aware of at the time of this review). Feel free to cite it, but I'd like to know [in the same breath] what the direct RNA accuracy was in \*your\* reads. L260-264 briefly discuss using different base-callers; how does that accuracy change depending on the base-caller?

Response: We have now included information regarding accuracy between base-callers: “Albacore 2.2.7 had the highest average accuracy across isolates (84.87%) closely followed by Guppy 3.0.3 (84.62%) and then Chiron v0.5 (78.19%) (Supplementary Table S6).” Line 279. The abstract also notes that we could identify accuracy up to 86% for direct RNA sequencing (Line 20).

**\*\* Figures \*\***

Figure 1:

- Would work better as a side-by-side bar plot. The split graph makes it look like one side is negative, and the other side is positive.
- Order by colour / class rather than abundance, with brackets indicating classifications.

Response: We initially considered side-by-side bar plots however, this would result in approximately 40 bars on the y-axis which is difficult to follow. We have now split the x-axis to better delineate between DNA and RNA data. Furthermore, an overlay of this data based on yield rather than time has been included in the supplementary results (Figure S4). The main text is written in the context of time to detect a particular gene conferring resistance to an antibiotic class, hence, why we ordered this as time of detection rather than grouping the antibiotic classes.

Figure 2:

- This figure is unclear to me. If this figure is relative expression (e.g. the statistic used for the correlation plot in Figure 3), then the presented data should be relative proportions, probably in log space (e.g.  $\log_2(\text{gene}/\text{rpsL})$ ).
- Why was *rpsL* chosen for normalisation?

Response: Unfortunately, the wrong figure legend was included for Figure 2 and has been amended. This data is counts per million (cpm) mapped reads rather than normalized to *rpsL*. We didn't adjust to relative proportions for this figure (or Figure 4, which is also in cpm) as the main text mentions cpm values. However, for comparisons of direct RNA to qRT-PCR (e.g. Figure 3 and Figure 5) we did normalize relative to housekeeping gene *rpsL*. This housekeeping gene has been used previously in literature (reference 46). We also have data for another housekeeping gene, *rpoB*, which generated similar results.

Figure 3:

- Were there any sample replicates? Are you able to estimate error in any measurements?
- The colour is confusing for this graph. You could try gene name for colour, and different plot symbols for different samples.

Response: All qRT-PCR measurements were done in triplicates (Line 170). There are no sample replicates for direct RNA sequence data. This is because the primary aim of the paper is to evaluate time-to-detection of antibiotic resistance genes across multiple samples (emulating a clinical setting in which a single replicate would be sequenced for each sample, particularly in the context of not having access to direct RNA multiplexing and so running a single sample in a single flow cell). However, we can estimate variation in the proportion of reads mapping to each gene (and hence the counts-per-million) by assuming the observed read counts are generated from a binomial distribution, so we can estimate a 90% CI in the expression levels using the conjugate beta prior. We show these estimates in Supplementary Figure S7.

Regarding the colours, there are 4 samples and eleven genes, so we didn't think colouring by gene would work (too many genes). We selected to colour by sample, and indicate the gene names on the plot. We have followed the suggestion of using different symbols per isolate.

Figure 4:

- What do the bottom panels describe (e.g. gene expression level scatter plots comparing each sample with each other sample)? This is not stated in the figure legend.

Response: Yes, the bottom panels include the expression levels between differing isolates in a scatter plot. This has now been added to the legend.

Figure 5:

- I recommend changing this to a side-by-side bar plot, as the text indicates that the comparison of A vs B is important.

Response: This figure has now been amended with the data on a single graph.

### **Reviewer #3:**

The manuscript by Pitt et al interrogated the genome and transcriptome of PDR and XDR *K. pneumoniae* isolates using the Oxford Nanopore MinION device. This is the very first study which adopted nanopore approaches in direct bacterial mRNA sequencing. The authors established a methodology for adding poly(A) tail onto mRNA transcripts which will benefit future bacterial sequencing and diagnosis related studies. However, authors failed to explain clearly the advantage of using Nanopore for RNA sequencing to Illumina platform. In another word, why we need to develop RNA sequencing using Nanopore since it is not an efficient way to do it and very complicated. In addition, the manuscript indeed showed that the coverage of RNA seq is very low and the correlation is not good. In my view, if there is no specific need to do RNA seq using Nanopore platform, there is no need to develop it since the Illumina platform is very good already in this application.

Response: Please refer to our first response to Reviewer #1.

In addition, I also have the following major comments:

1. Line 169, section "Antibiotic resistance and the location of acquired resistance in the genome "The authors reported the AMR genes and their location in this section. Since this is a technical manuscript, can the authors provide some sequencing information? The volume of data generated with time, coverage of each sequenced sample, the accuracy of the sequence, and the comparison of different assembly methods could be briefly discussed.

Response: We've now included additional information regarding the DNA sequencing: "MinION DNA sequencing for all isolates was run for  $\geq 20$  hours which generated 1.19 GB (215X) for 1\_GR\_13, 0.39 GB (67X) for 2\_GR\_12, 0.56 GB (101X) for 16\_GR\_13 and 0.64 GB (115X) for 20\_GR\_12 (Supplementary Table S2). Across the differing assembly tools, the chromosome sequence commonly circularised as a 5.0-5.4 Mb contig including plasmids ranging between 13-193 kb with the exception of 2\_GR\_12. Aligning ONT reads to the final assembly revealed that this DNA sequencing had a 90% accuracy rate across isolates." (Line 184) A comparison of several assembly methods is given in Supplementary Table 2, but we don't discuss this in much detail in the paper as it is not the focus of this work.

2. Line 256, only a low proportion of these RNA sequencing reads passed base-calling. Is it also related to the sample preparation apart from the inaccuracy of the base-calling software?

Response: Indeed, RNA sample preparation could influence the subsequent quality of the data and we attempted several protocol optimizations. We trialed phenol/ chloroform RNA extractions however, this process was lengthy and resulted in a low yield of RNA and increased impurities. The PureLink RNA Mini Kit protocol is relatively quick (<30 mins/ sample). We attempted an on-column DNase treatment during this protocol but the best DNA depletion was observed using TURBO DNase which doesn't work on column (requires 37°C incubation). Our optimized RNA extraction resulted in Bioanalyzer RNA integrity scores of  $\geq 8.5$  which has now been included in Line 116 (RIN scale 0-10, 10 is no degradation using 16S and 23S pecks as reference). Unfortunately, we were unaware of the efficiency of the polymerase until post sequencing analysis was performed (Supplementary Figure S6), hence, a shorter incubation can be implemented for future studies. However, the majority of inaccuracy appears to be due to the base-calling software unable to accurately trim the long artificial poly(A) tail and potential interference to the raw read signal via RNA modifications (Line 391).

3. Would the authors compare the genome and transcriptome a little bit to link these data?

Response: We have drawn various comparisons between the genome and transcriptome to link the sequencing data. In particular, tables and figures comparing both RNA and DNA include Figure 1, Table S5, Figure S3 and Figure S4 with corresponding sections in the main text. Additional information in the discussion has been provided to highlight the pros and cons regarding interpreting antibiotic resistance using either DNA or RNA. "We further investigated the transcriptome of these isolates to potentially elucidate the correlation between genotype and the subsequent resistant phenotype. Detection of antibiotic resistance via sequencing commonly uses DNA due to the instability of RNA and the lengthy sample processing such as rRNA depletion [12-15, 58]. However, RNA provides additional information regarding the functionality of genes such as identifying conditions in which a resistance gene is present but not active which gives rise to a false positive via DNA alone. Conversely, if expression is only induced in the presence of an antibiotic, the absence of RNA transcripts results in a false negative." (Line 367). "Furthermore, the time required to detect resistance may be hindered by the slower translocation speed associated with direct RNA sequencing (70 bases/ second) compared to DNA sequencing (450 bases/ second) [57]. Although cDNA would overcome this limitation, our findings show that detection was primarily due to level of expression when evaluating data yield rather than time." (Line 394).

4. Line 381, "a number of resistance genes were identified that were not present in the final assembly. The authors were expected to discuss why this happens and how to deal with these false positive data.

Response: The discussion on this topic has now been extended: "Furthermore, a small number of resistance genes were identified that were not present in the final assembly, however these all had MAPQ values less than 10 and less than 30 mapped reads. Some of these may be due to low-level kit contamination, while some of the false positives have sequence similarity to true positives and may be due to inaccuracies in base-calling." (Line 363).
